# Supplementary material for: ISBP: Understanding the Security Rule of Users' Information-Sharing Behaviors in Partnership
Source: PLoS One. 2016 Mar 7;11(3):e0151002. doi: 10.1371/journal.pone.0151002 (PMC4780783; doi:10.1371/journal.pone.0151002)
Supplement: S1 File — We hired 860 participants from Sojump to attend our survey, but 86 participants were eliminated from further analysis for not passing the cheating test. (XLS) [file pone.0151002.s001.xls]

## Sheet: Sheet1
Sid	Start	Finish	IP	VisitBy	Gender	Age	Major/Work	(1)Geography location showed on your phone app	(2)Time showed on your phone app	(3)Voice record on your phone	(4)Data phone of your phone	(5)App downloaded on your phone	(6)Website browsed on your phone	(7)Calender events	(8)Phone model and type	(9)Daily data usage	(10)Homepage of your phone browser	(11)Race	(12)Permanent address	(13)Current location	(14)Work focus	(15)Monthly salary	(16)Daily time spent on reading	(17)YY/MM/DD	(18)Highest level of education completed	(19)Political Ideologies	(20)Bank deposit	(21)Population density	(22)Home path	(23)Time spent on watching TV	(24)Information related to your child(ren)	(25)Degree of interpersonal harmony	(26)News section you like to read	(27)Favorite sports	(28) Online bills	(29)Email message	(30)Bank loan
1	2015/3/20 13:54:53	1219seconds	182.32.173.122(山东-济南)	Poster Link	femaile	>30	notComputer	family member	family member	family member	family member	friends┋family member	family member	family member	friends┋family member┋strangers	family member	family member	friends┋family member	family member	family member	friends┋family member	none	family member	family member	friends┋family member┋strangers	family member	none	family member	family member	family member	family member	family member	friends┋family member	family member	family member	none	family member
2	2015/3/20 14:07:43	2005seconds	169.234.49.195(未知-未知)	Poster Link	male	<=30	Computer	friends┋family member	family member┋strangers┋friends	family member	friends┋family member┋strangers	friends┋family member┋strangers	family member	family member	friends┋family member┋strangers	family member	family member	friends┋family member┋strangers	friends┋family member	family member┋friends	friends┋family member	family member	friends┋family member┋strangers	friends┋family member┋strangers	friends┋family member	family member┋strangers┋friends	family member	family member	family member	family member	family member	family member	friends┋family member┋strangers	friends┋family member┋strangers	family member	family member	family member
3	2015/3/20 14:14:11	162seconds	112.224.20.119(山东-青岛)	Mobile Phone	femaile	>30	notComputer	family member	family member	family member	family member	family member	none	none	friends┋family member┋strangers	family member	family member	friends┋family member┋strangers	friends┋family member	family member	friends┋family member┋strangers	family member	family member	family member	friends┋family member	family member┋friends	none	friends┋family member	family member┋friends	family member	family member	family member	family member	family member	none	none	family member
4	2015/3/20 15:08:03	280seconds	120.192.27.114(山东-济南)	Poster Link	male	>30	notComputer	family member	family member	none	family member	none	none	none	friends┋family member	family member	none	friends┋family member┋strangers	friends┋family member	none	friends┋family member	family member┋friends	friends┋family member	family member┋friends	friends┋family member┋strangers	friends┋family member┋strangers	family member	friends┋family member┋strangers	friends┋family member	family member┋friends	family member	family member	friends┋family member	family member┋strangers┋friends	none	none	none
5	2015/3/20 15:13:03	236seconds	120.192.27.114(山东-济南)	Poster Link	male	>30	notComputer	none	family member	none	family member	none	none	none	friends┋family member┋strangers	none	none	friends┋family member┋strangers	friends┋family member	none	friends┋family member	family member	friends┋family member	family member┋friends	friends┋family member	family member┋strangers┋friends	none	friends┋family member┋strangers	none	friends┋family member	none	friends┋family member	family member┋friends	friends┋family member	none	none	none
6	2015/3/20 15:24:10	253seconds	120.192.27.113(山东-济南)	Poster Link	male	<=30	Computer	friends┋family member	family member┋strangers┋friends	family member	family member	friends┋family member	none	family member	friends┋family member	family member┋friends	friends┋family member	family member┋friends	friends┋family member	family member┋friends	friends┋family member	family member┋friends	friends┋family member	family member┋friends	friends┋family member	family member┋friends	none	friends┋family member┋strangers	friends┋family member	none	family member	friends┋family member	family member┋friends	friends┋family member	family member	none	none
7	2015/3/20 15:28:30	92seconds	120.192.27.2(山东-济南)	Mobile Phone	femaile	<=30	notComputer	friends┋family member	friends	friends┋family member	none	none	none	friends┋family member	family member┋friends	none	none	friends┋family member	family member┋friends	friends┋family member	family member┋friends	family member	friends┋family member	family member	friends┋family member	family member┋friends	friends┋family member	family member┋friends	friends┋family member	family member┋friends	friends┋family member	family member┋friends	friends┋family member	family member	none	none	none
8	2015/3/20 15:29:14	654seconds	120.192.27.114(山东-济南)	Poster Link	femaile	>30	notComputer	family member	family member	family member	family member	none	none	family member	friends┋family member	none	none	friends┋family member┋strangers	friends┋family member	family member	friends┋family member	family member	none	none	friends┋family member┋strangers	friends┋family member┋strangers	none	none	family member	none	none	none	family member	family member	none	none	none
9	2015/3/20 15:29:34	164seconds	120.192.27.6(山东-济南)	Poster Link	male	<=30	notComputer	friends┋family member	family member┋friends	friends┋family member	family member┋strangers┋friends	family member	friends	none	friends┋family member	family member┋friends	strangers	friends┋family member	family member┋friends	friends┋family member	family member┋friends	friends┋family member	family member┋friends	friends┋family member	family member┋strangers┋friends	family member┋strangers┋friends	family member┋friends	friends┋family member┋strangers	friends┋family member	family member┋friends	friends┋family member	family member┋friends	friends┋family member┋strangers	friends┋family member┋strangers	friends┋family member	none	none
10	2015/3/20 15:38:37	116seconds	120.192.27.7(山东-济南)	Poster Link	male	<=30	notComputer	friends	friends	none	friends	family member	none	none	friends	none	none	none	friends	friends	none	none	none	friends	friends	none	none	none	friends	none	none	none	friends	none	none	none	none
11	2015/3/20 15:38:46	131seconds	120.192.27.118(山东-济南)	Poster Link	femaile	<=30	notComputer	friends┋family member	family member	none	friends┋family member	family member┋friends	none	family member	friends┋family member	family member┋friends	friends┋family member	family member┋friends	friends┋family member	family member┋friends	friends┋family member	family member	friends┋family member	family member┋friends	friends┋family member	family member┋friends	family member	friends┋family member	family member┋friends	family member	family member	friends┋family member	family member┋friends	friends┋family member	none	none	none
12	2015/3/20 15:39:05	150seconds	120.192.27.4(山东-济南)	Poster Link	femaile	<=30	notComputer	friends┋family member	family member┋friends	none	friends┋family member	family member┋friends	friends┋family member	family member┋friends	friends┋family member	family member┋friends	friends┋family member	family member┋strangers┋friends	family member	friends┋family member	family member┋friends	friends┋family member	family member┋friends	friends┋family member	family member┋friends	family member	family member	friends┋family member┋strangers	family member	family member	family member	friends┋family member	family member┋friends	friends┋family member┋strangers	friends┋family member	none	none
13	2015/3/20 15:39:58	58seconds	120.192.27.4(山东-济南)	Poster Link	male	<=30	Computer	friends┋family member	family member┋friends	friends┋family member	family member	family member	family member	family member	family member	family member	family member	family member	family member	family member	family member	family member	family member	family member	family member	family member	family member	family member	family member	family member	family member	family member	family member	family member	family member	family member	family member
14	2015/3/20 15:40:51	35seconds	210.72.26.48(北京-北京)	Poster Link	male	<=30	notComputer	family member	family member	family member	family member	family member	family member	family member	family member	family member	family member	family member	family member	family member	family member	family member	family member	family member	family member	family member	family member	family member	family member	family member	family member	family member	family member	family member	family member	family member	family member
15	2015/3/20 15:41:02	125seconds	120.192.27.1(山东-济南)	Poster Link	male	<=30	notComputer	none	friends┋family member	family member┋friends	none	none	none	none	family member	none	none	friends┋family member	family member┋friends	friends┋family member	family member┋friends	none	family member	friends┋family member	family member┋friends	none	none	friends┋family member	family member	none	none	none	none	friends┋family member	none	none	none
16	2015/3/20 15:41:47	99seconds	159.226.110.27(北京-北京)	Poster Link	male	<=30	notComputer	friends┋family member	family member┋friends	none	none	friends	none	none	friends┋family member	none	none	none	none	friends┋family member	family member┋friends	none	none	none	none	none	none	none	none	none	none	none	none	none	none	none	none
17	2015/3/20 15:42:18	74seconds	120.192.27.114(山东-济南)	Poster Link	femaile	<=30	notComputer	family member	family member	family member	friends	friends	friends	friends	friends	strangers	friends	family member	family member	family member	family member	family member	family member	family member	family member	family member	family member	family member	family member	family member	family member	family member	family member	family member	family member	family member	family member
18	2015/3/20 15:44:11	143seconds	218.59.235.194(山东-枣庄)	Poster Link	male	<=30	Computer	friends┋family member	family member┋friends	friends┋family member	none	friends┋family member	none	none	friends┋family member	none	none	friends┋family member	family member┋friends	friends┋family member	family member┋friends	friends┋family member	none	friends┋family member	family member┋friends	friends┋family member	family member┋friends	friends	friends	none	friends┋family member	friends	none	none	none	none	family member
19	2015/3/20 15:46:18	113seconds	58.22.113.198(福建-福州)	Mobile Phone	femaile	<=30	notComputer	family member	none	none	friends┋family member┋strangers	family member	family member	friends	friends┋family member	family member┋friends	friends┋family member	family member┋friends	family member	family member	family member	family member	family member	friends	strangers	strangers	family member	strangers	friends	friends	friends	friends	friends	friends	friends	friends	friends
21	2015/3/20 15:48:10	146seconds	159.226.117.46(北京-北京)	Poster Link	femaile	<=30	Computer	friends┋family member	family member┋friends	family member	friends┋family member	family member┋friends	none	none	friends┋family member	family member┋strangers┋friends	none	friends┋family member	family member┋friends	friends┋family member	family member	none	friends┋family member	family member┋friends	friends┋family member	family member	none	friends┋family member┋strangers	family member	family member	family member	friends┋family member	family member┋friends	friends┋family member	none	none	none
22	2015/3/20 15:56:58	95seconds	120.192.27.1(山东-济南)	Poster Link	femaile	<=30	notComputer	none	none	friends	friends	friends	none	none	friends┋family member	friends	none	friends┋family member	family member┋friends	friends┋family member	family member┋friends	family member	none	friends┋family member	family member┋friends	friends┋family member	family member	friends┋family member	family member┋friends	none	none	friends	friends	friends	none	none	none
23	2015/3/20 15:58:32	382seconds	120.192.27.7(山东-济南)	Mobile Phone	femaile	<=30	Computer	friends┋family member	family member┋strangers┋friends	family member┋friends	friends┋family member┋strangers	friends┋family member┋strangers	none	none	friends┋family member	family member┋strangers┋friends	family member┋strangers┋friends	family member┋friends	friends┋family member	family member┋friends	friends┋family member	family member┋friends	friends┋family member	family member┋friends	friends┋family member	family member┋friends	none	friends┋family member	family member┋friends	friends┋family member	family member┋friends	none	friends┋family member	family member┋friends	friends┋family member	family member┋friends	none
24	2015/3/20 16:00:20	176seconds	117.136.37.143(山东-青岛)	Mobile Phone	femaile	<=30	notComputer	friends┋family member	family member┋friends	friends┋family member	family member┋friends	friends┋family member┋strangers	friends┋family member	family member┋friends	friends┋family member┋strangers	none	none	friends┋family member	family member┋friends	friends┋family member	family member┋friends	friends┋family member	family member┋friends	friends┋family member	family member┋strangers┋friends	family member┋strangers┋friends	family member┋friends	friends┋family member┋strangers	friends┋family member	family member┋strangers┋friends	family member┋friends	friends┋family member┋strangers	friends┋family member┋strangers	friends┋family member┋strangers	friends┋family member	none	family member
26	2015/3/20 16:11:56	107seconds	120.192.27.5(山东-济南)	Poster Link	male	<=30	Computer	family member	family member	family member	family member	family member	family member	friends┋family member	family member┋friends	none	none	friends┋family member	family member┋friends	friends┋family member	family member┋friends	family member	none	friends┋family member	family member┋friends	friends┋family member	family member	friends┋family member	family member┋friends	friends┋family member	none	family member	friends┋family member	family member┋friends	friends┋family member	family member	none
27	2015/3/20 16:18:57	127seconds	219.246.36.37(甘肃-兰州)	Poster Link	femaile	<=30	notComputer	friends┋family member	family member┋friends	friends┋family member	family member┋friends	friends┋family member	family member┋friends	friends┋family member	family member┋friends	friends┋family member	family member┋friends	friends┋family member	family member┋friends	friends┋family member	family member┋friends	family member	friends┋family member	family member┋friends	friends┋family member	family member┋friends	family member	friends┋family member	family member┋friends	friends┋family member	family member┋friends	friends┋family member	family member┋friends	friends┋family member	family member	friends┋family member	family member
29	2015/3/20 16:26:16	194seconds	120.192.27.6(山东-济南)	Poster Link	femaile	<=30	notComputer	none	none	family member	friends	friends	family member	none	friends┋family member	none	none	none	friends┋family member	friends	friends	none	none	friends┋family member	family member┋friends	friends┋family member	none	friends	friends	none	friends	friends	friends	friends	friends	none	none
30	2015/3/20 16:41:32	1994seconds	221.123.141.2(江苏-未知)	Poster Link	femaile	<=30	Computer	family member	friends┋family member	none	none	none	none	friends┋family member	family member┋friends	none	none	friends┋family member	family member┋friends	friends┋family member	family member┋friends	family member	none	friends┋family member	family member┋friends	friends┋family member	family member	friends┋family member┋strangers	friends┋family member	family member	family member	friends┋family member	family member┋friends	friends┋family member	none	none	none
31	2015/3/20 18:28:28	202seconds	222.67.30.28(上海-上海)	Mobile Phone	femaile	>30	Computer	none	none	friends┋family member	none	none	family member	none	family member	none	none	friends┋family member	family member┋friends	family member	friends┋family member	family member	friends┋family member	family member┋friends	friends┋family member	family member┋friends	family member	friends┋family member	family member	family member	family member	friends┋family member	family member┋friends	friends┋family member	family member	none	family member
32	2015/3/20 21:37:38	100seconds	120.192.27.3(山东-济南)	Poster Link	male	<=30	Computer	none	none	friends┋family member	family member┋friends	none	none	friends┋family member	family member┋friends	friends┋family member	family member┋friends	friends┋family member	family member┋friends	friends┋family member	family member┋friends	friends┋family member	family member┋friends	friends┋family member	family member┋friends	friends┋family member	family member	friends┋family member	family member┋friends	friends┋family member	family member	family member	friends┋family member	family member┋friends	family member	none	none
33	2015/3/21 16:07:32	177seconds	223.99.197.192(山东-未知)	Mobile Phone	femaile	<=30	Computer	friends	friends	none	friends┋family member	family member┋friends	none	none	friends┋family member	none	friends┋family member	family member┋friends	friends┋family member	family member	family member	family member	family member	family member	friends┋family member	family member┋friends	family member	family member	friends┋family member	friends	family member	friends┋family member┋strangers	friends┋family member┋strangers	friends┋family member┋strangers	family member	none	family member
34	2015/3/21 16:15:59	645seconds	223.99.197.205(山东-未知)	Poster Link	male	<=30	Computer	friends	friends	family member	none	friends	friends	none	friends┋family member	friends	friends	friends┋family member┋strangers	friends┋family member	family member┋friends	friends	none	family member	friends┋family member	family member┋friends	friends┋family member	family member	friends┋family member┋strangers	friends┋family member	strangers	none	family member	friends	friends┋family member	none	none	none
35	2015/3/21 16:27:57	127seconds	223.99.197.204(山东-未知)	Mobile Phone	male	<=30	Computer	friends┋family member	none	none	none	friends┋family member┋strangers	none	none	none	none	none	friends┋family member┋strangers	friends┋family member	family member┋friends	friends┋family member	family member┋friends	none	friends┋family member	family member┋friends	friends┋family member	family member	none	friends┋family member	friends	friends	friends	friends	friends	friends	friends	friends
36	2015/3/21 16:51:56	201seconds	223.99.197.205(山东-未知)	Poster Link	male	<=30	notComputer	friends┋family member┋strangers	friends┋family member┋strangers	friends┋family member	family member┋strangers┋friends	family member┋friends	none	none	none	none	friends┋family member	family member┋friends	friends┋family member┋strangers	friends┋family member	family member	none	none	friends┋family member┋strangers	friends┋family member┋strangers	none	none	none	friends┋family member	none	friends┋family member	family member┋friends	friends┋family member	family member┋strangers┋friends	family member	none	none
37	2015/3/21 17:09:27	124seconds	223.99.197.196(山东-未知)	Mobile Phone	femaile	<=30	notComputer	family member	friends┋family member	family member┋friends	none	friends┋family member	family member┋friends	none	friends┋family member	none	none	friends┋family member┋strangers	none	friends┋family member	family member┋friends	family member	friends┋family member	family member┋friends	friends┋family member	family member┋friends	none	none	none	none	none	none	friends┋family member	family member┋friends	friends┋family member	none	none
38	2015/3/21 17:11:27	141seconds	223.99.197.207(山东-未知)	Mobile Phone	male	<=30	Computer	none	none	none	none	none	none	none	none	none	none	friends	family member	none	friends	family member	friends	friends	friends	friends	family member	friends	family member	none	none	family member	friends	friends	none	none	none
39	2015/3/21 17:15:32	141seconds	223.99.197.193(山东-未知)	Mobile Phone	male	>30	Computer	friends	friends	friends	friends┋family member	friends	friends	friends	family member	friends┋family member	friends	friends	friends	friends	friends	friends	friends	friends	friends	friends	none	friends	friends	friends	family member	friends	friends	friends	friends	friends	family member
40	2015/3/21 17:28:42	119seconds	223.99.197.203(山东-未知)	Mobile Phone	femaile	<=30	notComputer	family member	friends┋family member	family member	family member	friends┋family member┋strangers	family member	family member	friends┋family member┋strangers	friends┋family member	family member	friends┋family member	family member┋friends	friends┋family member	family member┋strangers┋friends	family member	family member	friends┋family member	family member┋strangers┋friends	family member┋strangers┋friends	family member	friends┋family member	family member	friends┋family member┋strangers	family member	family member	friends┋family member	family member┋friends	family member	family member	family member
41	2015/3/21 18:45:56	148seconds	112.224.20.71(山东-青岛)	Mobile Phone	male	<=30	Computer	friends┋family member	family member┋strangers┋friends	family member┋friends	friends┋family member┋strangers	friends┋family member┋strangers	friends	friends┋family member┋strangers	friends┋family member┋strangers	friends┋family member┋strangers	friends┋family member┋strangers	friends┋family member┋strangers	friends┋family member	family member┋friends	friends┋family member┋strangers	friends┋family member	family member┋strangers┋friends	family member┋strangers┋friends	family member┋strangers┋friends	family member┋strangers┋friends	family member	friends┋family member┋strangers	friends┋family member	family member┋friends	friends┋family member	family member┋friends	friends┋family member┋strangers	friends┋family member┋strangers	friends┋family member┋strangers	none	none
42	2015/3/21 19:44:46	150seconds	223.99.197.200(山东-未知)	Mobile Phone	femaile	<=30	notComputer	none	friends┋family member	family member	friends┋family member	family member┋friends	friends┋family member	none	friends┋family member	none	none	friends┋family member┋strangers	friends┋family member	family member┋friends	friends┋family member	family member	none	friends┋family member	family member┋friends	friends┋family member	family member	friends┋family member	family member	family member	family member	friends┋family member	family member┋friends	friends┋family member	family member┋friends	friends┋family member	family member┋friends
43	2015/3/21 19:45:36	121seconds	223.99.197.202(山东-未知)	Mobile Phone	male	<=30	notComputer	friends┋family member	family member	family member	friends┋family member	family member┋friends	family member	none	friends┋family member┋strangers	friends┋family member	family member┋friends	family member	family member	friends┋family member	family member┋friends	family member	friends┋family member	family member	family member	family member	family member	family member	family member	family member	family member	family member	friends┋family member	family member	family member	none	family member
44	2015/3/21 20:10:16	104seconds	223.99.197.205(山东-未知)	Mobile Phone	femaile	<=30	Computer	friends	friends	friends	friends	friends	friends	friends	friends	friends	friends	friends	friends	friends	friends	friends	friends	friends	friends	friends	friends	friends	friends	friends	friends	friends	friends	friends	friends	friends	friends
45	2015/3/21 20:26:33	196seconds	113.128.134.183(山东-济南)	Mobile Phone	male	>30	notComputer	none	friends┋family member┋strangers	none	none	none	none	none	friends┋family member┋strangers	none	none	friends┋family member┋strangers	friends┋family member	family member	friends┋family member┋strangers	family member	none	friends┋family member	family member┋strangers┋friends	family member┋friends	none	none	none	family member	none	none	friends┋family member	family member┋strangers┋friends	none	none	none
46	2015/3/21 20:30:29	157seconds	113.128.134.183(山东-济南)	Mobile Phone	femaile	>30	notComputer	family member	friends┋family member	family member	family member	family member	none	none	friends┋family member	family member	family member	friends┋family member	family member┋friends	family member	friends┋family member	family member	none	family member	family member	family member	none	family member	family member	family member	none	none	none	none	none	none	none
47	2015/3/21 20:34:02	129seconds	113.128.134.183(山东-济南)	Mobile Phone	femaile	>30	notComputer	family member	family member	none	family member	family member	none	none	friends┋family member	family member	family member	friends┋family member	family member┋friends	family member	friends┋family member	none	family member	family member	friends┋family member┋strangers	none	none	family member	family member	family member	none	none	family member	family member	none	none	none
48	2015/3/21 20:36:27	124seconds	113.128.134.183(山东-济南)	Mobile Phone	femaile	>30	notComputer	family member	friends┋family member	none	family member	family member	none	none	friends┋family member	family member	family member	friends┋family member	family member┋friends	family member	family member	family member	family member	family member	friends┋family member	none	none	friends┋family member	family member	family member	none	none	none	family member	none	none	none
49	2015/3/21 21:03:29	74seconds	223.99.197.202(山东-未知)	Mobile Phone	male	<=30	Computer	friends┋family member	family member┋friends	none	friends┋family member	family member	none	none	none	none	none	none	none	friends┋family member	none	none	friends┋family member	none	none	none	none	none	none	none	none	none	none	none	none	none	none
50	2015/3/21 22:59:09	101seconds	223.99.197.193(山东-未知)	Mobile Phone	femaile	<=30	notComputer	none	none	none	none	none	none	none	none	none	none	none	friends┋family member	none	none	none	none	friends┋family member	family member┋friends	none	none	friends┋family member	family member	friends	none	family member	family member	family member	family member	none	none
51	2015/3/22 7:55:45	227seconds	113.128.134.183(山东-济南)	Mobile Phone	femaile	>30	notComputer	family member	family member	none	family member	family member	none	none	friends┋family member┋strangers	family member	family member	friends┋family member┋strangers	friends┋family member	family member	friends┋family member	none	none	family member	friends┋family member┋strangers	friends┋family member	none	none	family member	family member	none	none	friends┋family member	family member┋friends	none	none	none
52	2015/3/22 7:59:13	197seconds	113.128.134.183(山东-济南)	Mobile Phone	male	>30	notComputer	none	none	none	family member	none	none	none	friends┋family member┋strangers	none	none	friends┋family member┋strangers	friends┋family member	none	friends┋family member┋strangers	friends┋family member┋strangers	none	friends┋family member	family member┋strangers┋friends	family member┋strangers┋friends	none	friends┋family member	family member	none	none	none	friends┋family member	family member┋friends	none	none	none
53	2015/3/22 8:01:48	146seconds	113.128.134.183(山东-济南)	Mobile Phone	male	>30	notComputer	none	none	none	none	none	none	none	friends┋family member	none	none	friends┋family member┋strangers	friends┋family member	none	friends┋family member	family member	none	family member	friends┋family member	family member┋strangers┋friends	none	none	family member	family member	none	family member	friends┋family member	family member┋strangers┋friends	none	none	none
55	2015/3/23 13:57:00	127seconds	113.128.41.241(山东-济南)	Mobile Phone	male	>30	notComputer	family member	family member	none	none	family member	none	none	friends┋family member┋strangers	none	none	friends┋family member┋strangers	friends┋family member	none	friends┋family member┋strangers	family member	family member	family member	friends┋family member┋strangers	friends┋family member┋strangers	none	friends┋family member	family member	family member	none	friends┋family member	family member┋strangers┋friends	family member┋strangers┋friends	none	none	none
56	2015/3/23 13:59:02	114seconds	113.128.41.241(山东-济南)	Mobile Phone	male	>30	notComputer	friends┋family member	family member	none	none	none	none	none	friends┋family member┋strangers	none	none	friends┋family member┋strangers	friends┋family member	family member	friends┋family member┋strangers	family member	family member	family member	friends┋family member┋strangers	friends┋family member┋strangers	none	friends┋family member┋strangers	family member	family member	none	family member	family member	friends┋family member┋strangers	none	none	none
57	2015/3/23 14:00:40	93seconds	113.128.41.241(山东-济南)	Mobile Phone	male	>30	notComputer	family member	family member	none	none	none	none	none	friends┋family member	none	none	friends┋family member┋strangers	family member	family member	friends┋family member┋strangers	none	family member	family member	friends┋family member┋strangers	friends┋family member┋strangers	none	friends┋family member	family member	family member	none	family member	friends┋family member	family member┋strangers┋friends	none	none	none
58	2015/3/23 14:02:20	91seconds	113.128.41.241(山东-济南)	Mobile Phone	femaile	>30	notComputer	none	family member	none	none	none	none	none	friends┋family member	none	none	friends┋family member	family member	family member	friends┋family member	none	family member	family member	friends┋family member	family member┋friends	none	family member	family member	family member	none	none	family member	family member	none	none	none
59	2015/3/23 14:03:54	88seconds	113.128.41.241(山东-济南)	Mobile Phone	femaile	>30	notComputer	family member	family member	none	family member	family member	family member	family member	friends┋family member	none	none	friends┋family member	family member┋friends	family member	friends┋family member	none	family member	family member	friends┋family member	family member┋friends	none	family member	family member	family member	none	family member	family member	family member	none	none	none
60	2015/3/23 14:06:02	124seconds	113.128.41.241(山东-济南)	Mobile Phone	femaile	>30	notComputer	family member	family member	none	none	none	family member	family member	friends┋family member	none	none	friends┋family member	family member┋friends	family member	friends┋family member	none	family member	family member	friends┋family member┋strangers	friends┋family member	none	family member	family member	family member	none	family member	family member	friends┋family member	none	none	none
61	2015/3/23 14:49:52	47seconds	120.192.27.2(山东-济南)	Poster Link	male	<=30	notComputer	family member	family member	family member	family member	family member	family member	family member	family member	family member	family member	family member	family member	family member	family member	family member	family member	family member	family member	family member	family member	family member	family member	family member	family member	family member	family member	family member	family member	family member	family member
62	2015/3/23 20:32:55	64seconds	202.127.144.66(上海-上海)	Mobile Phone	male	<=30	notComputer	friends	strangers	strangers	strangers	strangers	strangers	strangers	friends	strangers┋friends	strangers	friends	strangers	friends	strangers	strangers	friends	strangers	strangers	friends	strangers	strangers	strangers	none	none	family member	none	none	family member	friends	strangers
63	2015/3/23 20:34:11	34seconds	117.151.115.55(湖北-宜昌)	Mobile Phone	male	<=30	Computer	family member	family member	family member	family member	family member	family member	family member	family member	family member	family member	family member	family member	family member	family member	family member	family member	family member	family member	family member	family member	family member	family member	family member	family member	family member	family member	family member	family member	family member	family member
64	2015/3/23 20:34:38	109seconds	114.251.216.170(北京-北京)	Recommender System	femaile	<=30	notComputer	none	friends	friends	friends	friends┋family member	none	strangers┋friends	family member┋strangers┋friends	none	friends	friends┋family member	family member┋friends	friends┋family member	family member	family member	friends	friends┋family member	family member┋friends	friends┋family member	family member	friends┋family member	family member┋friends	none	family member	friends┋family member	none	none	friends	none	family member
65	2015/3/23 20:35:10	171seconds	222.180.154.208(重庆-重庆)	Mobile Phone	male	<=30	notComputer	none	none	none	friends┋family member	family member┋friends	friends┋family member	none	friends┋family member	family member┋friends	friends┋family member	family member┋friends	friends┋family member	family member┋friends	friends┋family member	family member┋friends	none	friends┋family member	family member┋friends	none	none	friends┋family member	family member	none	none	none	none	none	none	none	none
66	2015/3/23 20:39:24	247seconds	115.231.85.6(浙江-金华)	Recommender System	male	<=30	notComputer	friends	family member	strangers	friends	friends	strangers	none	friends	friends	friends	strangers	friends	none	strangers	strangers	none	strangers	strangers	friends	strangers	strangers	none	strangers	friends	strangers	none	friends	strangers	strangers	friends
67	2015/3/23 20:41:49	123seconds	27.184.221.20(河北-石家庄)	Recommender System	femaile	<=30	notComputer	none	none	none	none	none	friends	none	none	none	none	none	none	none	none	none	none	none	none	none	none	none	none	none	none	none	none	none	none	none	none
68	2015/3/23 20:42:26	118seconds	222.222.131.219(河北-保定)	Mobile Phone	male	<=30	notComputer	none	none	none	none	none	friends	friends	none	none	none	friends	friends	none	none	friends	friends	friends	friends	none	none	none	friends	none	none	friends	friends	none	none	none	none
69	2015/3/23 21:08:47	124seconds	125.88.255.0(广东-广州)	Mobile Phone	femaile	<=30	notComputer	friends┋family member	family member┋friends	friends┋family member	family member┋friends	friends┋family member	family member┋friends	friends┋family member	family member┋friends	family member	friends┋family member	family member┋friends	friends┋family member	family member┋friends	friends┋family member	family member┋friends	friends┋family member	family member┋friends	friends┋family member	family member┋friends	family member	friends┋family member	family member┋friends	friends┋family member	family member	family member	friends┋family member	family member┋friends	none	none	none
70	2015/3/23 21:12:18	96seconds	60.172.42.66(安徽-阜阳)	Recommender System	male	<=30	notComputer	family member	friends┋family member┋strangers	friends┋family member	family member	friends┋family member	family member┋friends	family member	friends┋family member┋strangers	friends┋family member┋strangers	friends┋family member┋strangers	friends┋family member┋strangers	friends┋family member┋strangers	friends┋family member	family member┋friends	family member	friends┋family member┋strangers	friends┋family member	family member┋strangers┋friends	family member┋strangers┋friends	family member	friends┋family member┋strangers	friends┋family member┋strangers	friends┋family member┋strangers	family member	family member	friends┋family member┋strangers	friends┋family member┋strangers	family member	none	none
71	2015/3/23 21:18:36	143seconds	221.181.237.141(江苏-连云港)	Recommender System	femaile	<=30	notComputer	friends	friends	family member	friends	strangers	none	family member	family member	strangers	strangers	family member	strangers	family member	family member	family member	friends	family member	strangers	strangers	family member	none	friends	none	strangers	friends	none	none	friends	none	family member
72	2015/3/23 21:19:01	213seconds	128.100.238.38(未知-未知)	Recommender System	male	>30	notComputer	none	none	none	none	none	none	none	none	none	none	none	none	none	none	none	none	none	none	none	none	none	none	none	none	none	none	none	none	none	none
74	2015/3/23 21:20:11	106seconds	113.57.19.189(湖北-武汉)	Recommender System	male	<=30	Computer	none	family member	family member	friends┋family member	friends	friends	none	friends┋family member	family member┋friends	friends┋family member	friends	friends	friends	friends	family member	friends┋family member	friends	friends	friends	family member	family member	family member	friends┋family member	family member	family member	friends	friends┋family member	family member	none	family member
75	2015/3/23 21:21:51	220seconds	115.57.254.164(河南-郑州)	Recommender System	male	>30	notComputer	none	none	none	friends	none	none	none	none	friends	friends	friends	friends	friends	friends	friends	family member	friends	friends	friends	family member	family member	friends	none	none	none	family member	none	family member	none	family member
76	2015/3/23 21:23:27	78seconds	115.57.254.164(河南-郑州)	Recommender System	male	>30	notComputer	none	none	none	none	none	none	none	family member	family member	family member	family member	family member	family member	family member	family member	family member	family member	family member	friends	family member	family member	family member	family member	friends	friends	friends	friends	family member	friends	family member
77	2015/3/23 21:26:43	97seconds	202.118.244.82(黑龙江-哈尔滨)	Recommender System	male	<=30	notComputer	none	none	none	none	friends	friends	none	none	none	friends	friends	friends	friends	friends	none	none	friends	none	none	none	none	none	none	none	none	none	none	none	none	none
78	2015/3/23 21:26:45	104seconds	210.72.153.252(北京-北京)	Recommender System	male	<=30	notComputer	none	friends	friends	none	none	none	none	friends	none	none	none	friends	friends	friends	none	none	friends	friends	none	none	none	none	friends	friends	friends	friends	friends	friends	none	none
79	2015/3/23 21:28:39	200seconds	221.0.170.99(山东-青岛)	Recommender System	male	<=30	notComputer	friends┋family member	family member	none	none	friends┋family member┋strangers	none	none	none	none	friends┋family member	none	friends┋family member	family member┋friends	none	none	none	family member	family member	family member	none	none	friends┋family member	family member┋friends	family member	friends┋family member	family member┋strangers┋friends	family member┋strangers┋friends	none	none	none
80	2015/3/23 21:30:06	89seconds	125.46.10.238(河南-平顶山)	Recommender System	male	>30	notComputer	family member	friends┋family member	family member	friends┋family member	family member	friends┋family member	family member┋friends	friends	friends┋family member	family member┋friends	friends	friends┋family member	family member┋friends	family member	family member	family member	family member	family member	family member	family member	family member	family member	friends┋family member	family member┋friends	friends	friends┋family member	family member┋strangers┋friends	family member┋friends	friends┋family member	family member
81	2015/3/23 21:39:52	119seconds	125.88.255.22(广东-广州)	Recommender System	male	>30	notComputer	none	none	none	none	none	none	none	family member	none	none	none	none	none	none	none	none	family member	family member	none	none	none	none	none	none	none	family member	none	friends	none	family member
82	2015/3/23 21:40:48	96seconds	222.60.228.139(河南-南阳)	Recommender System	male	>30	notComputer	none	strangers	strangers	strangers	friends	friends	friends	strangers	friends	family member	friends	strangers	strangers	none	strangers	strangers	friends	friends	friends	family member	family member	strangers	strangers	friends	strangers	friends	friends	friends	friends	strangers
83	2015/3/23 21:42:34	64seconds	126.46.59.86(未知-未知)	Mobile Phone	male	>30	notComputer	none	none	none	none	none	strangers	strangers	strangers	strangers	strangers	friends	friends	friends	friends	friends	strangers┋friends	strangers	friends	friends	strangers	friends	strangers	friends	none	strangers	friends	strangers	friends	strangers	strangers
84	2015/3/23 21:46:56	88seconds	10.218.141.82(未知-未知)	Mobile Phone	femaile	<=30	notComputer	friends	friends	family member	none	none	friends	friends	family member	family member	friends	friends	strangers	strangers	friends	friends	friends	family member	family member	friends	family member	family member	family member	friends	strangers	friends	strangers	family member	family member	family member	family member
85	2015/3/23 21:51:00	140seconds	220.176.143.67(江西-吉安)	Recommender System	male	>30	notComputer	family member	family member	none	none	friends┋family member	none	none	friends┋family member	none	none	friends	friends	friends	friends	family member	none	friends	friends	none	none	friends	friends	none	none	none	friends	friends	none	none	family member
86	2015/3/23 21:55:57	58seconds	223.81.192.45(山东-青岛)	Recommender System	male	>30	notComputer	none	none	none	family member	family member	family member	family member	family member	family member	family member	family member	family member	family member	family member	family member	family member	family member	family member	family member	family member	family member	family member	family member	family member	family member	family member	family member	family member	family member	family member
87	2015/3/23 21:59:20	139seconds	116.249.58.162(云南-迪庆)	Recommender System	male	<=30	notComputer	friends┋family member	family member┋friends	friends┋family member┋strangers	none	friends┋family member┋strangers	none	none	friends┋family member┋strangers	none	none	friends┋family member┋strangers	friends┋family member	none	friends┋family member	family member	friends┋family member┋strangers	friends┋family member	family member┋strangers┋friends	friends	none	friends┋family member┋strangers	friends┋family member	friends	family member	friends┋family member	family member┋strangers┋friends	family member┋friends	family member	none	family member
88	2015/3/23 22:03:19	103seconds	101.30.232.25(河北-未知)	Mobile Phone	male	<=30	notComputer	none	none	strangers	friends	friends	friends	friends	strangers	strangers	strangers	strangers	friends	friends	strangers	strangers	strangers	strangers	friends	friends	friends	strangers	strangers	strangers	friends	friends	strangers	none	friends	none	strangers
89	2015/3/23 22:04:45	138seconds	223.3.83.131(江苏-南京)	Recommender System	femaile	<=30	notComputer	family member	friends┋family member	none	friends	friends	friends	none	friends┋family member	friends	friends	friends┋family member	family member┋friends	friends┋family member	family member┋friends	family member	friends	friends┋family member	family member┋friends	friends┋family member	none	friends┋family member	family member┋friends	friends	friends┋family member	none	friends	friends	friends	none	none
90	2015/3/23 22:04:56	118seconds	36.251.133.141(福建-泉州)	Recommender System	male	<=30	notComputer	family member	family member	family member	family member	family member	family member	family member	family member	family member	none	none	none	friends	friends	none	none	none	friends	family member	none	none	family member	family member	family member	family member	family member	family member	family member	family member	family member
91	2015/3/23 22:08:46	108seconds	183.64.203.219(重庆-重庆)	Recommender System	male	<=30	notComputer	none	friends┋family member	family member┋friends	friends┋family member	family member┋friends	friends┋family member┋strangers	friends┋family member	family member┋strangers┋friends	family member┋friends	friends┋family member	family member┋friends	friends┋family member	family member┋friends	friends┋family member	family member┋friends	friends┋family member	family member┋friends	friends┋family member	family member┋friends	family member	friends┋family member	family member┋friends	friends┋family member	family member	friends┋family member	family member┋friends	friends┋family member	family member┋friends	none	family member
92	2015/3/23 22:10:03	133seconds	180.98.56.98(江苏-南京)	Mobile Phone	male	<=30	notComputer	none	none	none	none	none	none	none	none	none	none	none	none	none	none	none	none	none	none	none	none	none	none	none	none	none	none	none	none	none	none
93	2015/3/23 22:11:48	65seconds	111.14.85.46(山东-济南)	Mobile Phone	femaile	<=30	notComputer	family member	family member	friends┋family member	friends	family member	friends	friends	friends┋family member	friends	friends	friends	friends	strangers	strangers	friends	friends	friends	friends	strangers	friends	friends	friends	friends	friends	friends	friends	strangers┋friends	friends	friends	friends
94	2015/3/23 22:14:17	138seconds	59.42.191.14(广东-广州)	Mobile Phone	male	<=30	notComputer	none	none	friends	none	none	none	none	friends	none	none	friends	friends	friends	friends	friends	none	friends	friends	none	none	friends	none	none	none	none	none	none	none	none	none
95	2015/3/23 22:27:13	113seconds	114.247.56.241(北京-北京)	Recommender System	male	<=30	notComputer	none	family member	none	family member	family member	family member	none	family member	family member	family member	family member	family member	friends	family member	family member	family member	family member	family member	family member	family member	family member	family member	family member	family member	family member	family member	family member	family member	family member	family member
96	2015/3/23 22:35:36	210seconds	59.175.216.190(湖北-武汉)	Recommender System	male	<=30	notComputer	none	none	none	none	none	friends	none	none	none	none	none	friends┋family member	none	friends┋family member	family member	friends┋family member	family member┋friends	friends┋family member┋strangers	friends┋family member	family member	friends┋family member	none	none	none	friends┋family member	family member┋friends	friends┋family member	none	none	none
97	2015/3/23 22:36:22	47seconds	222.132.184.90(山东-泰安)	Recommender System	male	<=30	notComputer	friends	friends	friends	friends	friends	friends	friends	friends	friends	friends	friends	friends	friends	friends	family member	friends	friends	friends	friends	family member	friends	friends	friends	family member	friends	friends	friends	friends	friends┋family member	family member
98	2015/3/23 22:38:11	219seconds	60.209.124.210(山东-青岛)	Recommender System	male	>30	notComputer	family member	family member	friends	family member	friends	none	none	friends	family member	family member	strangers	friends	friends	friends	family member	family member	friends	friends	friends	none	friends	friends	family member	family member	strangers	friends	friends	family member	none	family member
99	2015/3/23 22:49:18	112seconds	221.7.131.190(广西-南宁)	Recommender System	male	<=30	notComputer	family member	family member	none	none	none	none	none	none	none	none	friends┋family member┋strangers	none	none	none	none	none	friends┋family member	family member┋friends	friends┋family member┋strangers	none	none	none	none	none	none	none	friends┋family member┋strangers	none	none	none
100	2015/3/23 23:02:52	159seconds	115.155.71.220(甘肃-兰州)	Recommender System	male	<=30	notComputer	none	none	friends	friends┋family member	none	none	none	friends┋family member	friends	none	friends	friends┋family member	family member	family member	family member	family member	family member	family member	family member	none	none	none	none	none	none	none	friends	friends	none	none
101	2015/3/23 23:03:22	172seconds	101.75.132.117(河北-未知)	Recommender System	femaile	<=30	notComputer	none	friends┋family member	none	friends┋family member┋strangers	friends	none	none	none	friends┋family member	family member	family member	family member	none	friends┋family member	family member	family member	family member	friends┋family member┋strangers	friends┋family member┋strangers	none	friends┋family member	family member	family member	family member	family member	friends┋family member	family member┋friends	none	none	family member
102	2015/3/23 23:03:47	130seconds	117.136.38.154(北京-北京)	Mobile Phone	male	<=30	notComputer	family member	friends┋family member	family member┋friends	friends┋family member┋strangers	none	none	none	friends┋family member┋strangers	friends┋family member┋strangers	none	friends┋family member┋strangers	friends┋family member	family member┋friends	friends┋family member	none	friends┋family member┋strangers	friends┋family member	family member┋strangers┋friends	family member┋strangers┋friends	family member┋friends	friends┋family member┋strangers	friends┋family member	family member┋friends	family member	friends┋family member	family member┋friends	friends	friends┋family member	none	none
103	2015/3/23 23:12:23	137seconds	115.201.67.118(浙江-台州)	Recommender System	male	<=30	notComputer	none	none	none	none	none	none	none	none	none	none	friends	friends	friends	family member	family member	none	family member	family member	family member	none	friends	friends	friends	family member	none	friends	friends	none	none	none
105	2015/3/23 23:23:42	83seconds	222.168.143.57(吉林-吉林)	Mobile Phone	femaile	<=30	notComputer	family member	none	none	none	none	none	family member	family member	family member	family member	family member	family member	family member	family member	friends	friends	family member	strangers┋family member	strangers	friends	family member	friends	friends	friends	friends	family member	friends	friends	friends	friends
106	2015/3/23 23:25:45	71seconds	117.136.3.251(内蒙古-呼和浩特)	Mobile Phone	male	<=30	notComputer	none	none	strangers	strangers	strangers	friends	strangers	strangers	strangers	strangers	strangers	strangers	strangers	strangers	strangers	strangers	strangers	strangers	strangers	strangers	strangers	strangers	strangers┋friends	friends┋strangers	strangers	strangers	strangers┋friends	strangers	friends	strangers
107	2015/3/23 23:32:20	188seconds	49.140.45.249(吉林-长春)	Recommender System	male	<=30	notComputer	family member	family member	none	friends	friends	strangers┋friends	family member	strangers┋friends	none	friends┋family member	friends┋strangers	friends┋family member	family member┋friends	friends┋family member	family member┋friends	none	friends┋family member┋strangers	friends┋family member┋strangers	friends┋family member	family member	friends┋family member	family member	family member	family member	friends┋family member	family member┋friends	friends┋family member┋strangers	friends┋family member	family member	family member
108	2015/3/23 23:42:25	53seconds	123.147.245.70(重庆-重庆)	Mobile Phone	male	<=30	Computer	strangers	friends	friends	friends	strangers	friends	strangers	friends	strangers	family member	friends	strangers	strangers	friends	friends	friends	strangers	strangers	friends	strangers	strangers	strangers	strangers	friends	friends	strangers┋friends	strangers	friends	friends	friends
109	2015/3/23 23:56:05	48seconds	14.18.39.225(广东-广州)	Recommender System	femaile	<=30	notComputer	friends	strangers	strangers	friends	friends	family member	family member	friends	friends	none	strangers	friends	family member	friends	strangers	none	none	friends	strangers	friends	family member	family member	strangers	strangers	friends	none	none	none	strangers	strangers
111	2015/3/24 0:23:06	116seconds	124.117.234.170(新疆-乌鲁木齐)	Recommender System	male	<=30	notComputer	none	none	none	none	family member	none	none	family member	none	none	none	none	none	none	none	none	friends┋family member	family member┋friends	friends┋family member	none	none	none	none	none	family member	family member	friends┋family member	none	none	none
112	2015/3/24 0:28:44	112seconds	117.136.24.55(湖南-长沙)	Mobile Phone	femaile	<=30	notComputer	none	friends┋family member┋strangers	none	none	none	none	none	friends┋family member┋strangers	none	none	none	none	none	none	none	none	none	none	none	none	none	none	none	none	none	none	none	none	none	none
113	2015/3/24 0:59:10	287seconds	138.246.2.199(未知-未知)	Recommender System	femaile	>30	Computer	friends┋family member	family member┋strangers┋friends	none	none	none	none	none	friends┋family member	none	none	none	friends┋family member┋strangers	friends┋family member	family member┋friends	none	none	none	friends┋family member	none	none	friends┋family member	none	none	none	none	none	none	none	none	none
114	2015/3/24 6:25:24	224seconds	111.206.89.3(北京-北京)	Recommender System	male	>30	notComputer	none	none	family member	family member	family member	none	family member	family member	none	none	friends┋family member	family member┋friends	none	family member	family member	friends	family member	friends	family member	family member	none	none	family member	friends	friends	friends	friends	none	none	none
115	2015/3/24 7:43:42	95seconds	124.193.121.80(北京-北京)	Recommender System	male	<=30	notComputer	none	none	none	none	none	none	none	none	none	none	none	none	none	none	none	none	none	none	none	none	none	none	none	none	none	none	none	none	none	none
116	2015/3/24 7:48:18	97seconds	223.104.20.87(河南-郑州)	Mobile Phone	male	<=30	notComputer	friends┋family member┋strangers	friends┋family member┋strangers	none	friends┋family member┋strangers	friends┋family member	family member┋friends	none	family member	friends	friends	friends	family member	friends	friends	friends	friends	friends	friends	friends	friends	friends	family member	friends┋family member	friends	family member	friends	friends	family member	family member	friends
117	2015/3/24 8:06:05	303seconds	124.16.167.136(北京-北京)	Recommender System	male	<=30	notComputer	friends┋family member	none	family member	friends┋family member	none	none	none	none	none	none	none	none	friends┋family member	none	none	none	none	none	none	family member	friends┋family member	family member┋friends	friends┋family member	family member	friends┋family member	family member	friends┋family member	family member	family member	family member
118	2015/3/24 8:08:00	107seconds	222.223.200.141(河北-石家庄)	Recommender System	male	>30	notComputer	family member	friends┋family member	family member┋strangers┋friends	family member	friends┋family member	family member┋friends	family member	family member	family member	family member	family member	family member	friends┋family member	family member┋friends	family member	family member	friends┋family member	family member	family member	family member	family member	family member	family member	family member	friends┋family member	family member┋friends	friends┋family member	family member	friends┋family member	family member
119	2015/3/24 8:10:35	213seconds	222.171.12.107(黑龙江-哈尔滨)	Recommender System	male	<=30	notComputer	none	friends┋family member┋strangers	none	friends┋family member	friends	none	none	none	friends┋family member	none	none	friends┋family member	none	none	none	none	friends┋family member┋strangers	friends┋family member┋strangers	none	none	friends┋family member┋strangers	none	none	none	none	friends┋family member┋strangers	friends┋family member┋strangers	none	none	none
120	2015/3/24 8:19:03	63seconds	202.118.73.32(辽宁-大连)	Recommender System	femaile	<=30	notComputer	none	none	none	none	none	none	none	none	none	none	friends	friends	friends	friends	friends	friends	family member	friends	friends	none	none	none	none	none	none	none	none	none	none	none
121	2015/3/24 8:26:33	303seconds	159.226.126.119(湖北-武汉)	Recommender System	male	>30	Computer	none	friends	friends	family member	friends	friends	friends	friends	friends	friends	friends	family member	family member	family member	family member	none	none	friends	friends	family member	friends	friends	friends	family member	friends	friends	strangers	family member	friends	family member
122	2015/3/24 8:33:05	197seconds	124.152.254.14(甘肃-兰州)	Recommender System	male	<=30	notComputer	none	friends	none	family member	none	none	none	family member	none	none	friends┋family member┋strangers	friends┋family member	family member┋friends	none	none	none	friends┋family member	family member┋strangers┋friends	family member┋friends	none	friends┋family member┋strangers	friends┋family member	none	none	friends	friends┋family member	none	none	none	none
123	2015/3/24 8:33:20	90seconds	202.136.209.227(上海-上海)	Recommender System	male	>30	notComputer	none	none	none	none	none	none	none	none	none	none	none	none	none	none	none	none	none	none	none	none	none	none	none	none	none	none	none	none	none	none
124	2015/3/24 8:37:22	132seconds	219.231.143.242(山东-济南)	Recommender System	male	<=30	notComputer	friends┋family member	family member┋friends	friends┋family member	family member┋friends	friends┋family member	family member┋friends	friends┋family member	family member┋friends	friends┋family member	family member	friends┋family member	family member┋friends	friends┋family member	family member┋friends	friends┋family member	family member┋friends	friends┋family member	family member┋friends	friends┋family member	family member	friends┋family member	family member	friends┋family member	family member	friends┋family member	family member┋friends	friends┋family member	family member┋friends	family member	family member
125	2015/3/24 8:46:11	119seconds	120.192.27.114(山东-济南)	Recommender System	male	>30	notComputer	family member	family member	none	none	none	none	none	friends┋family member	none	none	friends┋family member┋strangers	friends┋family member	none	friends┋family member┋strangers	none	none	family member	friends┋family member┋strangers	friends┋family member┋strangers	none	friends┋family member	none	family member	none	family member	family member	friends┋family member	none	none	none
126	2015/3/24 8:48:43	155seconds	223.240.208.113(安徽-合肥)	Recommender System	male	>30	notComputer	friends┋family member	family member┋strangers┋friends	family member┋friends	friends┋family member┋strangers	friends┋family member┋strangers	friends┋family member┋strangers	friends┋family member┋strangers	friends┋family member┋strangers	friends┋family member┋strangers	friends┋family member┋strangers	friends┋family member┋strangers	friends┋family member	family member┋friends	friends┋family member	family member┋friends	friends┋family member┋strangers	friends┋family member┋strangers	friends┋family member┋strangers	friends┋family member┋strangers	friends┋family member	family member┋strangers┋friends	family member┋strangers┋friends	family member┋strangers┋friends	family member┋friends	friends┋family member┋strangers	friends┋family member┋strangers	friends┋family member┋strangers	friends┋family member	family member┋strangers┋friends	family member┋strangers┋friends
127	2015/3/24 8:49:24	100seconds	120.192.27.114(山东-济南)	Recommender System	male	>30	notComputer	family member	family member	none	none	none	none	none	friends┋family member	none	none	friends┋family member┋strangers	friends┋family member	family member	friends┋family member┋strangers	none	family member	family member	friends┋family member┋strangers	friends┋family member┋strangers	none	friends┋family member	family member	family member	none	friends┋family member	family member	friends┋family member	none	none	none
128	2015/3/24 8:58:19	197seconds	61.142.9.102(广东-东莞)	Recommender System	male	>30	notComputer	friends┋family member	family member┋friends	friends┋family member	family member┋strangers┋friends	family member┋strangers┋friends	family member┋strangers┋friends	none	friends┋family member┋strangers	friends┋family member┋strangers	friends┋family member┋strangers	none	friends┋family member	family member┋friends	friends┋family member	family member	none	friends┋family member┋strangers	friends┋family member┋strangers	friends┋family member┋strangers	none	none	none	none	friends┋family member	family member┋strangers┋friends	family member┋strangers┋friends	family member┋strangers┋friends	none	none	none
129	2015/3/24 8:58:55	76seconds	58.218.185.120(江苏-徐州)	Recommender System	male	>30	notComputer	friends┋family member	family member┋friends	friends┋family member	family member┋strangers┋friends	family member┋strangers┋friends	friends	family member	friends	friends	family member	family member	family member	family member	family member	family member	family member	family member	friends┋family member	family member	none	family member	family member	family member	family member	family member	family member	family member	family member	family member	none
130	2015/3/24 9:07:30	31seconds	218.76.50.10(湖南-长沙)	Recommender System	male	<=30	notComputer	friends	friends	friends	friends	friends	friends	friends	friends	friends	friends	friends	friends	friends	friends	friends	friends	friends	friends	friends	friends	friends	friends	friends	friends	friends	friends	friends	friends	friends	friends
131	2015/3/24 9:10:34	42seconds	119.86.172.2(重庆-重庆)	Recommender System	male	<=30	notComputer	none	none	none	none	none	none	none	none	none	none	none	none	none	none	none	none	none	none	none	none	none	none	none	none	none	none	none	none	none	none
132	2015/3/24 9:11:50	2980seconds	211.137.2.213(辽宁-沈阳)	Recommender System	male	<=30	notComputer	none	none	none	friends	friends	none	none	friends	none	friends	friends	friends	friends	friends	none	friends	friends	friends	friends	none	friends	friends	friends	friends	friends	friends	none	none	friends	none
133	2015/3/24 9:12:58	87seconds	202.201.12.177(甘肃-兰州)	Recommender System	femaile	<=30	Computer	friends┋family member	family member	friends	none	friends	friends┋family member	none	none	strangers	friends	strangers	strangers	strangers	friends	family member	family member	friends	friends	family member	family member	family member	friends	friends	friends	family member	family member	friends	friends	family member	family member
134	2015/3/24 9:14:28	231seconds	112.224.65.167(山东-青岛)	Mobile Phone	male	<=30	notComputer	family member	none	friends	friends	friends	none	family member	family member	friends	family member	friends┋family member┋strangers	friends┋family member┋strangers	friends┋family member	family member┋strangers┋friends	family member	friends	friends┋family member┋strangers	friends┋family member	family member	none	friends┋family member	family member┋friends	friends┋family member	family member┋friends	friends┋family member	family member┋friends	friends	family member	family member	none
135	2015/3/24 9:15:21	118seconds	218.4.189.23(江苏-苏州)	Recommender System	femaile	<=30	notComputer	friends┋family member	family member┋strangers┋friends	none	friends┋family member	family member┋strangers┋friends	family member┋friends	friends┋family member	family member┋strangers┋friends	friends	friends┋family member	family member┋strangers┋friends	family member┋strangers┋friends	family member┋friends	friends┋family member	family member┋strangers┋friends	family member┋strangers┋friends	family member┋strangers┋friends	family member┋strangers┋friends	family member┋strangers┋friends	none	friends┋family member┋strangers	friends┋family member	family member┋friends	friends┋family member┋strangers	friends┋family member┋strangers	friends┋family member┋strangers	friends┋family member┋strangers	friends┋family member	none	friends┋family member
136	2015/3/24 9:15:39	165seconds	124.93.242.131(辽宁-大连)	Mobile Phone	femaile	<=30	notComputer	friends┋family member	family member┋friends	family member	family member	none	family member	family member	friends┋family member	none	none	friends┋family member	family member┋friends	family member	family member	family member	family member	friends┋family member	family member┋friends	family member	family member	friends┋family member	family member	family member	family member	family member	family member	none	family member	family member	family member
137	2015/3/24 9:25:06	107seconds	60.29.153.27(天津-天津)	Recommender System	femaile	<=30	notComputer	friends	friends	friends	friends	none	none	none	friends	friends	none	none	friends	friends	none	none	friends	none	none	none	none	none	none	none	none	none	friends	friends	none	none	none
138	2015/3/24 9:28:54	226seconds	210.47.0.237(吉林-长春)	Recommender System	femaile	<=30	notComputer	friends┋family member	family member┋friends	friends┋family member	family member┋strangers┋friends	family member	none	family member	none	friends┋family member	none	friends┋family member┋strangers	friends┋family member	none	family member	family member	friends┋family member	none	friends┋family member┋strangers	family member	family member	friends┋family member┋strangers	family member	friends┋family member┋strangers	family member	family member	friends┋family member┋strangers	friends┋family member┋strangers	none	none	none
140	2015/3/24 9:36:32	88seconds	58.213.104.130(江苏-南京)	Recommender System	male	<=30	notComputer	none	none	none	none	none	none	none	none	none	none	none	none	none	none	none	none	none	none	none	none	none	none	none	none	none	none	none	none	none	none
142	2015/3/24 9:46:13	121seconds	210.41.243.1(四川-成都)	Recommender System	male	<=30	notComputer	friends┋family member	family member┋strangers┋friends	family member┋friends	friends┋family member	family member┋strangers┋friends	none	none	friends┋family member┋strangers	friends┋family member	family member┋friends	friends┋family member	family member┋strangers┋friends	family member┋strangers┋friends	family member┋strangers┋friends	none	friends┋family member	family member┋strangers┋friends	family member┋strangers┋friends	family member┋strangers┋friends	none	friends┋family member┋strangers	friends┋family member┋strangers	friends┋family member	family member┋friends	friends┋family member┋strangers	friends┋family member	family member┋strangers┋friends	none	none	none
144	2015/3/24 9:50:45	460seconds	211.161.165.244(湖北-武汉)	Recommender System	femaile	<=30	notComputer	friends	none	friends┋family member	family member┋friends	friends	none	none	friends┋family member	none	none	family member	friends┋family member	family member┋friends	friends┋family member	family member	friends	friends┋family member	family member┋friends	friends┋family member	family member	friends	friends┋family member	family member	none	friends┋family member	family member┋friends	none	none	none	none
145	2015/3/24 9:54:23	78seconds	211.137.2.167(辽宁-沈阳)	Recommender System	male	<=30	notComputer	none	none	none	none	none	none	none	none	none	none	family member	family member	family member	family member	family member	family member	family member	family member	family member	family member	family member	family member	family member	family member	family member	family member	family member	family member	family member	family member
146	2015/3/24 9:56:10	44seconds	123.129.50.171(山东-东营)	Mobile Phone	femaile	<=30	notComputer	family member	strangers	friends	friends	friends	strangers	strangers	strangers	strangers	strangers	strangers	strangers	strangers	strangers	strangers	strangers	strangers	strangers	strangers	strangers	strangers	strangers	strangers	strangers	strangers	strangers	strangers	strangers	strangers	strangers
147	2015/3/24 9:58:14	106seconds	182.87.41.75(江西-鹰潭)	Recommender System	femaile	<=30	notComputer	none	none	none	none	none	none	none	none	none	none	family member	none	none	family member	family member	none	family member	family member	none	family member	none	none	none	family member	none	none	none	none	none	family member
148	2015/3/24 10:14:03	224seconds	222.33.38.89(辽宁-沈阳)	Recommender System	male	<=30	Computer	friends┋family member	family member┋friends	friends┋family member	none	friends┋family member	none	none	friends┋family member	none	none	friends┋family member┋strangers	friends┋family member	family member┋friends	friends┋family member	family member	friends┋family member	family member┋friends	friends┋family member	family member┋friends	none	friends┋family member	family member┋friends	friends┋family member	family member	friends┋family member┋strangers	friends┋family member┋strangers	friends┋family member┋strangers	family member	none	none
149	2015/3/24 10:35:27	164seconds	61.179.124.4(山东-济宁)	Recommender System	male	<=30	notComputer	friends┋family member	family member┋friends	friends┋family member	family member┋friends	friends┋family member┋strangers	friends┋family member	family member┋friends	friends┋family member┋strangers	friends	friends┋family member	family member┋friends	family member	friends┋family member	family member┋friends	friends┋family member	family member	friends┋family member	family member┋strangers┋friends	family member	family member	friends┋family member	family member┋friends	friends┋family member	family member┋friends	family member	friends┋family member	family member┋friends	friends┋family member	family member┋friends	friends┋family member
150	2015/3/24 10:51:26	134seconds	221.0.57.109(山东-济南)	Recommender System	male	<=30	notComputer	none	none	none	friends	none	none	none	none	none	none	friends	friends	friends	friends	family member	friends	family member	friends	family member	family member	friends	friends	friends	family member	family member	family member	family member	family member	friends	strangers
151	2015/3/24 10:52:01	74seconds	106.39.19.230(北京-北京)	Recommender System	male	<=30	notComputer	family member	family member	family member	family member	family member	none	family member	strangers	family member	family member	family member	family member	family member	family member	family member	family member	family member	family member	family member	family member	family member	family member	family member	family member	family member	family member	family member	family member	family member	family member
152	2015/3/24 10:52:27	106seconds	58.155.212.52(辽宁-大连)	Recommender System	femaile	<=30	notComputer	strangers┋friends	none	none	none	none	none	none	none	none	none	friends	friends	none	none	none	none	friends	friends	none	none	none	none	none	none	none	none	none	none	none	none
153	2015/3/24 10:59:11	83seconds	182.149.206.81(四川-成都)	Recommender System	male	<=30	notComputer	none	none	none	none	none	none	none	friends┋family member	family member	none	none	none	none	none	none	none	none	none	none	none	none	none	none	none	none	none	none	none	none	none
155	2015/3/24 11:12:23	106seconds	222.131.124.153(北京-北京)	Recommender System	femaile	>30	notComputer	none	none	none	none	none	none	none	none	none	none	friends	none	none	none	none	none	none	strangers	none	none	none	none	none	none	none	none	none	none	none	none
156	2015/3/24 11:26:22	36seconds	119.78.98.86(北京-北京)	Recommender System	femaile	>30	Computer	friends	family member	strangers	friends	strangers	friends	family member	family member	family member	friends	family member	friends	family member	family member	family member	strangers	strangers	friends	friends	friends	family member	family member	friends	friends	friends	family member	family member	family member	friends	family member
157	2015/3/24 11:45:08	164seconds	159.226.165.21(北京-北京)	Recommender System	femaile	<=30	notComputer	friends┋family member	family member┋friends	friends┋family member	family member┋friends	friends┋family member┋strangers	friends┋family member┋strangers	family member	friends┋family member┋strangers	friends┋family member┋strangers	friends	friends┋family member	family member┋friends	friends┋family member	family member┋friends	family member	friends┋family member┋strangers	friends┋family member┋strangers	friends┋family member┋strangers	friends┋family member┋strangers	family member	friends┋family member	family member┋friends	friends┋family member	family member	friends┋family member	none	friends┋family member	none	none	none
158	2015/3/24 11:49:51	127seconds	183.175.152.155(山西-太原)	Recommender System	male	<=30	notComputer	friends	strangers	strangers	none	none	none	none	none	none	none	none	none	none	none	none	none	none	none	none	none	none	none	none	none	none	none	none	none	none	none
159	2015/3/24 13:29:23	113seconds	118.206.185.198(山东-济南)	Recommender System	femaile	>30	notComputer	none	none	family member	family member	friends┋family member	none	none	friends┋family member	family member┋friends	none	friends┋family member	family member┋friends	friends┋family member	family member┋friends	family member	friends┋family member	family member┋friends	friends┋family member	family member┋friends	family member	friends┋family member┋strangers	friends┋family member	family member┋friends	friends┋family member	family member┋friends	friends┋family member	family member┋friends	friends┋family member	family member	family member
160	2015/3/24 14:54:30	134seconds	210.47.0.237(吉林-长春)	Recommender System	femaile	<=30	notComputer	friends┋family member┋strangers	friends┋family member	family member	none	none	none	family member	none	none	none	none	friends┋family member┋strangers	friends┋family member	family member┋friends	family member	none	friends┋family member	family member┋strangers┋friends	family member	family member	none	family member	none	family member	family member	none	none	none	none	family member
161	2015/3/24 15:01:44	190seconds	221.213.28.195(云南-昆明)	Recommender System	male	>30	notComputer	family member	family member	friends┋family member	family member	none	none	none	friends┋family member	family member┋friends	none	none	friends┋family member	family member	friends┋family member	family member	friends┋family member	family member┋friends	friends┋family member	family member┋friends	none	none	none	none	none	none	friends	friends	none	none	friends┋family member
162	2015/3/24 15:16:41	110seconds	122.5.32.10(山东-烟台)	Recommender System	male	>30	notComputer	none	none	none	none	none	none	none	none	none	none	none	none	none	none	none	none	none	none	none	none	none	none	none	none	none	none	family member	none	none	none
163	2015/3/24 15:17:45	139seconds	118.7.224.188(未知-未知)	Recommender System	male	<=30	notComputer	friends┋family member	family member┋friends	friends┋family member	none	none	none	none	friends┋family member┋strangers	none	friends┋family member┋strangers	friends┋family member┋strangers	friends┋family member	family member┋friends	none	none	friends┋family member┋strangers	family member	friends┋family member┋strangers	none	none	none	none	none	none	friends┋family member┋strangers	friends┋family member┋strangers	friends┋family member┋strangers	none	none	none
164	2015/3/24 15:52:41	105seconds	222.169.161.20(吉林-白山)	Recommender System	femaile	<=30	notComputer	friends┋family member	family member┋friends	friends┋family member	family member┋friends	friends┋family member	family member┋friends	family member	family member	family member	friends	family member	family member	family member	family member	family member	family member	family member	family member	family member	family member	family member	family member	family member	family member	family member	family member	family member	family member	family member	family member
165	2015/3/24 15:55:22	124seconds	223.104.13.147(河北-石家庄)	Mobile Phone	male	>30	notComputer	family member	family member	strangers┋family member	family member┋friends	family member	none	none	family member	none	none	family member	family member	family member	family member	family member	family member	none	none	family member	none	family member	family member	none	none	family member	family member	friends┋family member	none	none	none
166	2015/3/24 16:55:16	68seconds	222.178.10.243(重庆-重庆)	WeChat	male	<=30	notComputer	strangers	strangers	strangers	strangers	strangers	strangers	strangers	strangers	strangers	strangers	strangers	strangers	strangers	strangers	strangers	friends	strangers	friends	strangers	friends	strangers	friends	strangers	friends	friends	strangers	friends	strangers	friends	strangers
167	2015/3/24 16:59:42	162seconds	171.8.225.217(河南-郑州)	Mobile Phone	femaile	<=30	notComputer	none	none	friends	friends	friends	friends┋family member	none	none	friends	none	none	none	friends	friends	none	friends┋family member	none	friends┋family member	family member┋friends	friends┋family member	friends	friends	none	friends	friends	friends	friends	friends	friends	none
168	2015/3/24 18:21:34	71seconds	124.152.240.202(甘肃-兰州)	Recommender System	male	<=30	notComputer	none	none	none	none	none	none	none	friends	none	none	none	none	none	none	none	none	none	none	none	none	none	none	none	none	none	none	none	none	none	none
169	2015/3/24 18:23:36	125seconds	60.13.141.36(新疆-乌鲁木齐)	Recommender System	male	<=30	notComputer	friends┋family member	strangers	strangers┋family member	friends	friends┋family member	friends	family member	friends	friends	friends	strangers┋friends	family member┋friends	friends┋family member	family member┋friends	friends┋family member	friends	friends┋family member	family member┋friends	friends	friends┋family member	family member	friends┋family member	friends┋strangers	strangers┋friends	friends	strangers┋friends	friends	friends	strangers┋friends	family member
170	2015/3/24 18:35:18	130seconds	180.85.7.239(四川-成都)	Recommender System	femaile	<=30	notComputer	friends┋family member	family member┋friends	friends┋family member	family member┋friends	friends┋family member	family member┋friends	friends┋family member	family member┋friends	friends┋family member	family member┋friends	friends┋family member	family member┋friends	friends┋family member	family member┋friends	friends┋family member	family member┋friends	friends┋family member	family member┋friends	friends┋family member	family member┋friends	friends┋family member┋strangers	friends┋family member	family member┋friends	friends┋family member	family member┋friends	friends┋family member	family member┋friends	friends┋family member	family member┋friends	friends┋family member
171	2015/3/24 18:41:22	48seconds	220.115.185.173(广东-广州)	Recommender System	male	<=30	Computer	family member	family member	friends	family member	family member	family member	family member	family member	family member	family member	family member	family member	family member	family member	family member	family member	family member	family member	family member	friends	friends	strangers	friends	family member	friends	friends	family member	friends	friends	family member
172	2015/3/24 18:41:59	175seconds	223.104.10.140(江西-南昌)	Mobile Phone	male	<=30	notComputer	none	none	none	friends	friends	none	none	none	friends	none	friends	family member	friends┋family member	family member┋friends	friends┋family member	family member┋friends	friends┋family member	family member┋friends	friends┋family member	none	none	friends	none	none	friends	friends	friends┋family member	none	none	none
173	2015/3/24 18:54:21	268seconds	119.50.192.57(吉林-延边)	Recommender System	femaile	>30	notComputer	family member	none	family member	family member	none	friends┋family member	none	none	family member	none	none	none	none	none	friends┋family member	none	none	none	none	none	none	none	friends┋family member	none	none	none	none	none	none	none
174	2015/3/24 19:06:27	238seconds	218.65.113.227(江西-南昌)	Recommender System	femaile	<=30	notComputer	family member	friends	friends	friends	family member	friends	friends	friends	strangers	strangers	strangers	strangers	strangers	friends	friends┋family member	friends	friends┋family member	friends	friends	family member	strangers	family member	strangers	friends┋family member	family member┋friends	friends	strangers	family member	friends┋family member	family member
175	2015/3/24 19:14:46	116seconds	77.245.71.13(未知-未知)	Recommender System	femaile	<=30	notComputer	family member	family member	none	none	friends	none	friends┋family member	family member┋strangers┋friends	none	friends	strangers┋friends	friends┋strangers	strangers┋friends	family member┋friends	family member	none	friends┋family member┋strangers	friends┋family member	family member┋strangers┋friends	none	none	friends┋family member	none	none	friends┋family member┋strangers	none	none	none	none	none
176	2015/3/24 19:17:26	92seconds	120.192.27.1(山东-济南)	Recommender System	femaile	<=30	notComputer	none	none	none	none	none	none	none	none	none	none	none	none	none	none	none	none	none	none	none	none	none	none	none	none	none	none	none	none	none	none
177	2015/3/24 19:38:02	72seconds	182.120.118.177(河南-焦作)	Recommender System	male	<=30	notComputer	friends	strangers	none	friends	friends	family member	friends	strangers	friends	friends	family member	friends	strangers	friends	friends	strangers	friends	strangers	none	strangers	friends	strangers	family member	family member	family member	friends	friends	strangers	strangers	strangers
178	2015/3/24 20:41:15	47seconds	115.193.182.154(浙江-杭州)	Recommender System	femaile	>30	notComputer	friends	friends	friends	friends	friends	friends	friends	friends	friends	friends	friends	friends	friends	friends	friends	friends	friends	friends	friends	friends	friends	friends	friends	friends	friends	friends	friends	friends	friends	friends
180	2015/3/24 20:53:18	83seconds	219.235.89.9(黑龙江-大庆)	Mobile Phone	femaile	<=30	notComputer	family member	family member	family member	friends┋family member	family member┋strangers┋friends	none	none	friends┋family member┋strangers	friends┋family member┋strangers	none	friends┋family member┋strangers	friends┋family member	family member	family member	family member	friends┋family member┋strangers	friends┋family member	family member┋strangers┋friends	family member┋strangers┋friends	family member┋friends	friends┋family member┋strangers	friends┋family member	family member┋friends	friends┋family member	friends	friends	friends	friends	friends	friends
181	2015/3/24 21:20:26	72seconds	211.162.81.121(江苏-南京)	Recommender System	femaile	<=30	notComputer	friends	friends	none	none	none	none	none	friends	none	none	friends	none	friends	none	none	none	friends	friends	friends	none	none	none	none	none	friends	none	none	none	none	none
183	2015/3/24 21:53:42	127seconds	183.93.244.241(湖北-宜昌)	WeChat	male	>30	notComputer	friends┋family member	family member	family member	family member	family member	family member	friends┋family member	family member┋friends	family member	family member	family member	family member	family member	family member	family member	family member	family member	family member	family member	family member	family member	family member	family member	family member	family member	family member	family member	family member	family member	family member
184	2015/3/24 22:02:35	74seconds	223.104.9.174(四川-成都)	Mobile Phone	male	<=30	notComputer	none	friends	friends	friends	friends	friends	friends	friends	friends	friends	friends	friends	friends	friends	friends	friends	friends	friends	friends	strangers	strangers┋friends	friends	friends	friends	friends	strangers┋friends	friends	friends	friends	friends
185	2015/3/24 22:03:28	160seconds	39.186.168.143(浙江-金华)	Recommender System	male	<=30	notComputer	friends┋family member┋strangers	friends┋family member┋strangers	friends┋family member┋strangers	none	none	none	none	friends┋family member┋strangers	none	friends┋family member	family member┋friends	friends┋family member	family member┋friends	friends┋family member	family member┋friends	friends┋family member	family member┋friends	friends┋family member	family member┋friends	family member	friends┋family member	family member┋friends	family member	family member	none	friends	friends	none	none	none
186	2015/3/24 22:21:07	34seconds	210.76.208.170(北京-北京)	Recommender System	male	<=30	notComputer	none	none	none	none	none	none	none	none	none	none	none	none	none	none	none	none	none	none	none	none	none	none	none	none	none	none	none	none	none	none
187	2015/3/24 22:25:37	176seconds	183.252.52.149(福建-福州)	Recommender System	male	>30	notComputer	family member	family member	family member	family member	family member	family member	family member	friends┋family member	none	family member	friends┋family member┋strangers	friends┋family member┋strangers	friends┋family member┋strangers	strangers┋family member	none	strangers	friends┋family member	family member┋strangers┋friends	family member┋strangers┋friends	family member	family member	family member	family member	friends┋family member	family member┋friends	friends┋family member	family member┋friends	friends┋family member	family member	family member
188	2015/3/24 22:28:23	183seconds	60.211.228.206(山东-济宁)	Mobile Phone	femaile	<=30	notComputer	friends	friends	friends	friends	strangers┋friends	friends	friends	friends	friends┋family member	family member┋friends	friends┋family member┋strangers	friends	friends┋family member	family member┋friends	friends┋family member	friends	friends	friends┋family member	family member┋friends	family member	friends┋family member┋strangers	friends┋family member	none	none	friends┋family member	family member┋strangers┋friends	family member┋strangers┋friends	family member	friends┋family member	family member
189	2015/3/24 22:36:10	49seconds	110.178.41.135(山西-太原)	Recommender System	femaile	<=30	notComputer	none	none	none	none	none	none	none	none	none	none	none	none	none	none	none	none	none	none	none	none	none	none	none	none	none	none	none	none	none	none
190	2015/3/24 22:40:07	73seconds	111.117.107.21(辽宁-大连)	Recommender System	femaile	<=30	notComputer	none	none	none	family member	family member	none	none	none	none	none	none	none	none	none	none	none	none	none	none	none	none	none	none	none	none	none	none	none	none	none
192	2015/3/24 23:01:01	111seconds	183.156.1.217(浙江-杭州)	Recommender System	male	>30	Computer	friends	friends	friends	none	friends	none	none	none	none	friends	friends	friends	friends	family member	none	none	family member	family member	none	none	strangers	none	none	family member	none	none	none	none	none	none
193	2015/3/24 23:15:41	80seconds	222.178.10.253(重庆-重庆)	Recommender System	male	<=30	notComputer	family member	friends	none	none	none	none	none	friends	none	none	none	none	family member	friends	none	none	none	none	none	none	none	none	none	none	none	friends	none	none	none	none
194	2015/3/24 23:38:46	125seconds	117.136.45.158(江苏-南京)	Mobile Phone	femaile	<=30	notComputer	family member	none	family member	friends	friends┋family member┋strangers	friends	strangers	family member	strangers	friends┋family member	friends	friends	strangers	friends	friends	friends	friends	friends	friends	strangers	friends	friends	strangers	friends	strangers	friends	friends	strangers	family member	friends
195	2015/3/24 23:42:45	142seconds	221.11.20.101(陕西-西安)	Recommender System	male	<=30	notComputer	friends┋family member	friends	none	none	none	none	none	friends	none	friends┋family member	family member┋friends	friends┋family member	family member┋friends	friends┋family member	family member┋friends	friends┋family member	family member┋friends	friends┋family member	none	family member	friends┋family member┋strangers	friends┋family member	family member┋friends	family member	friends┋family member	family member┋friends	friends┋family member┋strangers	family member	none	family member
196	2015/3/25 0:06:51	222seconds	221.7.131.166(广西-南宁)	Mobile Phone	femaile	<=30	notComputer	family member	friends	family member	friends	friends	none	family member	friends┋family member	friends	none	friends┋family member	family member	family member	friends┋family member	family member┋friends	friends┋family member	family member┋friends	friends┋family member	family member┋friends	family member	family member	family member	friends┋family member	family member┋friends	friends┋family member	family member┋friends	friends┋family member┋strangers	family member	family member	family member
197	2015/3/25 0:09:51	52seconds	61.185.200.238(陕西-西安)	Recommender System	male	>30	notComputer	none	strangers	strangers	strangers	strangers	none	strangers	strangers	strangers	none	none	strangers	strangers	strangers	strangers	none	strangers	strangers	strangers	strangers	strangers	strangers	strangers	strangers	strangers	strangers	strangers	strangers	strangers	strangers
198	2015/3/25 7:46:36	139seconds	210.41.216.1(四川-成都)	Mobile Phone	male	<=30	notComputer	friends┋family member	family member┋friends	family member	none	friends	none	none	friends┋family member	none	none	friends┋family member	family member┋friends	friends┋family member	family member┋friends	none	none	friends┋family member	family member┋friends	none	none	friends┋family member	family member┋friends	none	none	none	strangers┋friends	friends	friends	none	none
199	2015/3/25 8:03:36	72seconds	222.171.178.70(黑龙江-哈尔滨)	Recommender System	male	>30	notComputer	none	friends┋family member	family member	friends┋family member	family member┋friends	family member	family member	friends┋family member	family member	family member	family member	family member	family member	family member	family member	family member	family member	family member	family member	family member	family member	family member	family member	family member	family member	family member	family member	family member	family member	family member
200	2015/3/25 8:05:59	181seconds	211.167.85.38(北京-北京)	Recommender System	male	<=30	notComputer	friends┋family member	none	friends┋family member	friends	friends┋family member	family member	family member	friends	friends	friends	friends	friends	friends	friends	friends	family member	family member	friends	friends	none	friends	friends	none	none	none	friends┋family member	family member┋friends	none	none	none
201	2015/3/25 8:07:40	66seconds	211.167.85.38(北京-北京)	Recommender System	male	<=30	notComputer	friends┋family member	family member┋friends	friends	friends	friends	friends	friends	friends	friends	none	none	none	none	none	none	none	none	friends┋family member┋strangers	friends┋family member	none	none	none	none	none	none	friends┋family member┋strangers	friends┋family member┋strangers	none	none	none
202	2015/3/25 8:16:25	157seconds	125.126.30.125(浙江-台州)	Recommender System	femaile	>30	notComputer	family member	friends┋family member	family member	friends┋family member	family member┋friends	friends┋family member	none	friends┋family member	family member┋friends	friends┋family member	family member┋friends	friends┋family member	family member┋friends	friends┋family member	family member┋friends	friends┋family member	family member┋friends	friends┋family member	family member┋friends	none	none	none	friends┋family member	family member┋friends	friends┋family member	family member┋friends	family member	none	none	none
203	2015/3/25 8:44:32	163seconds	117.88.108.20(江苏-南京)	Recommender System	femaile	<=30	Computer	friends┋family member	family member┋friends	friends┋family member	family member┋friends	friends┋family member	family member	family member	friends┋family member	family member	friends┋family member	family member┋friends	friends┋family member	family member┋friends	friends┋family member	family member┋friends	friends┋family member	family member┋friends	friends┋family member	family member┋friends	family member	friends┋family member	family member	family member	friends┋family member	family member┋friends	friends┋family member┋strangers	friends┋family member┋strangers	family member	none	family member
204	2015/3/25 8:50:39	174seconds	222.47.60.17(福建-厦门)	Recommender System	male	<=30	notComputer	none	none	none	friends┋family member┋strangers	friends┋family member┋strangers	friends	none	friends┋family member	none	none	friends┋family member┋strangers	friends┋family member┋strangers	friends┋family member	family member┋friends	family member	friends	friends┋family member┋strangers	friends┋family member┋strangers	friends┋family member	family member	friends	friends┋family member	family member	friends┋family member	family member┋friends	friends	friends	friends	none	family member
205	2015/3/25 9:09:57	230seconds	117.136.22.63(河南-郑州)	Mobile Phone	male	<=30	Computer	friends┋family member	family member┋friends	family member	friends┋family member┋strangers	friends┋family member	none	none	friends	none	none	friends┋family member┋strangers	friends┋family member	family member	friends┋family member	none	friends┋family member┋strangers	friends┋family member	family member┋friends	family member	none	friends┋family member	none	friends┋family member	none	none	none	friends┋family member	none	none	none
206	2015/3/25 9:16:10	197seconds	112.111.1.79(福建-福州)	Recommender System	male	>30	notComputer	friends	friends	friends	family member	family member	family member	family member	friends	family member	family member	none	friends	friends	family member	family member	friends	family member	family member	family member	family member	family member	family member	friends	family member	family member	friends	friends	family member	none	family member
207	2015/3/25 9:17:42	92seconds	124.225.196.51(海南-三亚)	Recommender System	male	<=30	notComputer	family member	family member	family member	family member	family member	none	none	friends┋family member	family member	family member	family member	family member	friends┋family member	family member	friends┋family member	family member	family member	family member	none	family member	friends┋family member	family member	none	none	none	none	none	none	none	family member
208	2015/3/25 9:21:26	136seconds	58.243.254.5(安徽-合肥)	Mobile Phone	male	<=30	Computer	none	friends┋family member	none	friends┋family member	family member┋friends	none	none	friends┋family member	family member┋friends	none	friends┋family member	family member┋friends	friends┋family member	family member┋friends	family member	friends┋family member	family member┋friends	friends┋family member	family member┋friends	family member	friends┋family member	family member┋friends	friends┋family member	family member┋friends	friends┋family member	family member┋friends	friends┋family member	family member┋friends	friends┋family member	family member
209	2015/3/25 9:24:08	213seconds	115.231.85.13(浙江-金华)	Recommender System	femaile	<=30	notComputer	none	none	none	friends┋family member	none	friends┋family member	family member	family member	friends┋family member	family member┋friends	friends┋family member	family member┋friends	family member	friends┋family member	family member	none	friends┋family member	family member┋strangers┋friends	none	family member	friends┋family member┋strangers	friends┋family member	family member	family member	friends┋family member	family member┋friends	family member	friends┋family member	family member	family member
210	2015/3/25 9:25:49	196seconds	175.167.152.221(辽宁-沈阳)	Mobile Phone	femaile	<=30	notComputer	none	friends┋family member	none	friends	friends┋family member	none	none	friends┋family member	none	friends┋family member	family member┋friends	friends┋family member┋strangers	none	friends┋family member	none	friends┋family member┋strangers	friends┋family member	family member┋friends	friends┋family member	none	friends┋family member┋strangers	friends┋family member	family member┋strangers┋friends	family member	friends┋family member	family member┋strangers┋friends	family member┋strangers┋friends	none	none	none
211	2015/3/25 9:31:30	115seconds	219.141.99.179(贵州-铜仁)	Recommender System	femaile	>30	notComputer	friends	friends	family member	friends	friends	friends	strangers	strangers	strangers	strangers	strangers	strangers	strangers	friends	friends	strangers	friends	strangers	strangers	friends	strangers	strangers	strangers	friends	strangers	strangers	strangers	strangers	strangers	friends
212	2015/3/25 9:34:44	290seconds	219.243.215.212(北京-北京)	Recommender System	femaile	<=30	notComputer	family member	friends┋family member	none	friends┋family member┋strangers	friends┋family member	none	none	friends┋family member┋strangers	friends┋family member	none	friends┋family member	family member┋friends	friends┋family member┋strangers	friends┋family member	none	none	friends┋family member	family member┋friends	none	none	none	friends┋family member┋strangers	friends┋family member	family member┋friends	friends┋family member	friends	friends┋family member	none	none	none
213	2015/3/25 9:43:23	82seconds	124.88.160.5(新疆-伊犁)	Recommender System	femaile	<=30	notComputer	none	none	none	none	none	none	none	none	none	none	none	none	none	none	none	none	none	none	none	none	none	none	none	none	none	friends	friends	none	none	none
214	2015/3/25 9:53:40	81seconds	123.139.23.170(陕西-西安)	Recommender System	male	<=30	notComputer	friends┋family member	friends	friends	friends	friends	friends	friends	friends	friends	friends	friends	friends	friends	friends	friends	friends	friends	friends	friends	family member	friends	friends	friends	friends	friends	friends	friends	friends	friends	friends
215	2015/3/25 9:56:38	159seconds	202.127.146.180(上海-上海)	Recommender System	femaile	<=30	notComputer	none	none	family member	friends┋family member	family member	none	friends┋family member	family member┋friends	none	none	friends┋family member	family member┋friends	none	friends┋family member	family member┋friends	friends	friends	friends	friends	family member	friends	family member	none	none	friends	friends┋family member	family member┋friends	friends┋family member	none	family member
216	2015/3/25 9:58:21	51seconds	223.198.43.40(海南-海口)	Recommender System	femaile	<=30	notComputer	family member	family member	family member	family member	family member	family member	family member	family member	family member	family member	family member	family member	family member	family member	family member	family member	family member	family member	family member	family member	family member	family member	family member	family member	family member	family member	family member	family member	family member	family member
217	2015/3/25 10:01:46	89seconds	220.163.43.226(云南-昆明)	Recommender System	male	>30	notComputer	friends	friends	family member	family member	family member	family member	friends	friends	family member	family member	friends	friends	friends	friends	friends	friends	family member	family member	family member	family member	friends	family member	friends	friends	friends	family member	friends	friends	family member	friends
219	2015/3/25 10:21:37	130seconds	106.39.41.162(北京-北京)	Recommender System	femaile	<=30	notComputer	none	none	none	friends┋family member	family member┋friends	none	family member	none	none	none	friends┋family member┋strangers	friends┋family member	family member┋friends	friends┋family member	family member┋friends	none	friends┋family member	family member┋friends	friends┋family member	none	none	friends┋family member	family member┋friends	none	friends┋family member	family member┋friends	friends┋family member	family member┋friends	friends┋family member	none
220	2015/3/25 10:27:52	104seconds	218.104.96.139(湖北-武汉)	Recommender System	male	<=30	notComputer	friends┋family member	family member┋friends	none	none	none	none	none	friends┋family member	none	none	none	none	friends┋family member	family member┋friends	family member	none	friends┋family member	family member┋strangers┋friends	family member┋friends	family member	friends┋family member┋strangers	friends┋family member	family member┋friends	family member	family member	friends┋family member	family member┋friends	none	none	none
221	2015/3/25 10:31:04	72seconds	124.152.254.16(甘肃-兰州)	Recommender System	male	>30	notComputer	none	friends	friends	family member	family member	family member	family member	friends	friends	friends	friends	none	friends	none	friends	none	friends	friends	friends	family member	family member	family member	family member	family member	family member	family member	strangers	friends	friends	family member
222	2015/3/25 10:40:09	69seconds	114.223.32.192(江苏-无锡)	Recommender System	male	>30	notComputer	none	none	none	none	none	none	none	none	none	none	none	none	none	none	none	none	none	none	none	none	none	none	none	none	none	none	none	none	none	none
224	2015/3/25 10:56:39	192seconds	27.20.54.119(湖北-荆州)	Recommender System	male	<=30	notComputer	family member	family member	none	friends┋family member	family member┋friends	friends	friends┋family member┋strangers	friends┋family member	family member┋friends	friends┋family member	family member┋friends	friends┋family member	family member┋friends	family member	family member	friends┋family member	family member	friends┋family member	family member┋friends	family member	friends	friends┋family member	family member┋friends	family member	friends┋family member	family member	friends	friends┋family member	none	family member
225	2015/3/25 10:58:50	54seconds	113.57.245.196(湖北-武汉)	Mobile Phone	male	<=30	notComputer	none	none	none	none	none	none	none	none	none	none	none	none	none	none	none	none	none	none	none	none	none	none	none	none	none	none	none	none	none	none
226	2015/3/25 11:00:40	80seconds	27.20.54.119(湖北-荆州)	Recommender System	male	<=30	notComputer	friends┋family member	family member┋friends	friends┋family member	family member┋friends	friends┋family member	family member┋friends	friends┋family member	family member┋friends	friends┋family member	family member┋friends	friends┋family member	family member┋friends	friends┋family member	family member	family member	friends┋family member	family member	friends┋family member	family member	family member	friends┋family member	family member┋friends	friends┋family member	family member	friends┋family member	family member┋friends	friends┋family member	family member┋friends	none	family member
227	2015/3/25 11:01:13	115seconds	211.83.105.4(四川-成都)	Mobile Phone	male	<=30	notComputer	friends	family member	family member	family member	friends	none	friends	friends	family member	friends	friends	family member	friends	friends	family member	friends	friends	friends┋family member┋strangers	strangers┋friends	family member	friends┋family member	family member┋friends	friends┋family member	family member	friends┋family member	family member┋friends	friends┋family member	family member┋friends	friends┋family member	family member┋friends
228	2015/3/25 11:04:01	129seconds	58.241.125.34(江苏-镇江)	Recommender System	male	<=30	notComputer	friends┋family member	family member┋friends	family member	friends┋family member	family member┋friends	family member	family member	friends┋family member┋strangers	friends┋family member	family member┋friends	friends┋family member	family member┋friends	friends┋family member	family member┋friends	family member	friends┋family member	family member┋friends	friends┋family member	family member┋strangers┋friends	family member	friends┋family member┋strangers	friends┋family member	family member	family member	friends┋family member	family member┋strangers┋friends	family member┋strangers┋friends	family member┋friends	family member	family member
229	2015/3/25 11:04:20	183seconds	210.77.76.186(甘肃-兰州)	Recommender System	male	>30	notComputer	family member	family member	none	friends┋family member	family member┋friends	none	none	family member	friends	family member	friends┋family member	family member┋friends	family member	friends┋family member	family member	friends┋family member	family member┋friends	friends┋family member	none	family member	friends┋family member┋strangers	friends┋family member	family member	family member	friends┋family member	family member	friends┋family member	family member	none	family member
230	2015/3/25 11:06:42	84seconds	27.20.54.119(湖北-荆州)	Recommender System	male	<=30	notComputer	friends┋family member	family member┋friends	friends┋family member	family member┋friends	friends┋family member	family member┋friends	friends┋family member	family member┋friends	friends┋family member	family member┋friends	friends┋family member	family member┋friends	friends┋family member	family member	family member	friends┋family member	family member	friends┋family member	family member┋friends	friends┋family member	family member┋friends	friends┋family member	family member┋friends	friends┋family member	family member┋friends	friends┋family member	family member┋friends	friends┋family member	none	family member
231	2015/3/25 11:08:01	89seconds	58.251.17.58(广东-深圳)	Recommender System	male	<=30	notComputer	friends┋family member	family member┋friends	none	none	none	none	none	friends┋family member	none	none	friends┋family member	family member┋friends	friends┋family member	family member┋friends	friends┋family member	family member┋friends	friends┋family member	family member┋friends	friends┋family member	family member	friends┋family member	family member┋friends	friends┋family member	family member┋friends	friends┋family member	family member┋friends	friends┋family member	family member┋friends	friends┋family member	family member
232	2015/3/25 11:09:56	50seconds	125.76.214.252(陕西-西安)	Mobile Phone	male	<=30	notComputer	family member	friends	friends	friends	family member	friends	family member	friends	strangers	none	none	strangers	strangers	friends	family member	strangers	friends	strangers	friends	strangers	family member	strangers	friends	strangers	friends	strangers	friends	family member	strangers┋family member	strangers
233	2015/3/25 11:10:10	167seconds	120.194.28.103(河南-郑州)	Recommender System	male	<=30	notComputer	family member	family member	family member	family member	family member	friends	family member	family member	friends┋family member	family member	family member	friends	friends┋family member	family member	friends┋family member	family member	friends┋family member	friends	family member	family member	friends┋family member	family member	friends	family member	friends	friends	family member	friends	strangers┋family member	friends
234	2015/3/25 11:11:53	135seconds	111.17.198.158(山东-德州)	Recommender System	male	<=30	notComputer	none	friends	friends┋family member	none	none	none	none	friends┋family member	none	none	friends┋family member	family member┋friends	friends┋family member	family member┋friends	friends┋family member	none	friends┋family member	family member┋friends	none	none	none	family member	none	none	none	strangers┋family member	family member┋friends	none	none	family member
236	2015/3/25 11:16:26	169seconds	58.216.216.230(江苏-常州)	Mobile Phone	male	<=30	notComputer	friends┋family member	family member┋friends	friends┋family member	family member┋friends	friends┋family member┋strangers	none	none	friends┋family member┋strangers	friends┋family member┋strangers	friends┋family member┋strangers	friends┋family member┋strangers	friends┋family member┋strangers	friends┋family member	family member	family member	friends┋family member┋strangers	friends┋family member┋strangers	friends┋family member┋strangers	friends┋family member┋strangers	family member	friends┋family member┋strangers	friends┋family member	family member┋strangers┋friends	family member	friends┋family member	family member┋strangers┋friends	family member┋strangers┋friends	none	none	none
237	2015/3/25 11:17:48	147seconds	221.181.104.200(上海-上海)	Mobile Phone	male	<=30	notComputer	strangers┋friends	friends┋strangers	none	none	none	none	none	strangers┋friends	none	none	friends┋family member┋strangers	strangers┋family member	family member┋strangers┋friends	family member┋strangers┋friends	family member┋friends	none	friends┋family member┋strangers	friends┋family member┋strangers	none	family member	friends┋family member	family member┋friends	friends┋family member	family member┋friends	friends┋family member	friends┋strangers	strangers┋friends	friends	none	none
238	2015/3/25 11:18:13	54seconds	222.82.246.50(新疆-乌鲁木齐)	Recommender System	male	>30	notComputer	friends┋family member	family member	family member	family member	family member	family member	family member	family member	family member	family member	friends┋family member	family member┋friends	friends┋family member	family member┋friends	friends┋family member	family member┋friends	friends┋family member	family member┋friends	friends┋family member	family member	family member	family member	family member	family member	family member	family member	family member	family member	family member	family member
239	2015/3/25 11:24:52	94seconds	60.247.55.223(北京-北京)	Mobile Phone	male	<=30	notComputer	friends┋family member	friends	family member	friends	friends┋family member	family member┋friends	family member	friends	friends	friends	friends	family member	friends	family member	friends┋family member	friends	friends	family member	friends	friends	family member	family member	friends	family member	friends	family member	friends	family member	friends	family member
240	2015/3/25 11:27:27	325seconds	113.57.244.131(湖北-武汉)	Mobile Phone	femaile	<=30	notComputer	none	none	friends┋family member	family member┋friends	friends┋family member	family member┋friends	none	friends┋family member	family member┋friends	none	friends┋family member	family member┋friends	friends┋family member	family member┋friends	friends┋family member	none	friends┋family member	family member┋friends	friends┋family member	none	none	none	none	friends┋family member	family member┋friends	friends┋family member	family member┋friends	none	none	none
241	2015/3/25 11:27:57	284seconds	218.75.158.13(湖南-常德)	Mobile Phone	femaile	<=30	notComputer	family member	none	none	none	none	none	none	friends┋family member	none	none	friends┋family member┋strangers	friends┋family member	family member	family member	family member	friends┋family member┋strangers	friends┋family member┋strangers	friends┋family member┋strangers	friends┋family member┋strangers	family member	family member	family member	friends┋family member	family member	friends┋family member	family member┋strangers┋friends	family member┋strangers┋friends	friends	none	none
242	2015/3/25 11:31:33	136seconds	58.16.46.15(贵州-贵阳)	Mobile Phone	male	<=30	notComputer	friends┋family member	family member┋friends	friends┋family member	none	friends	friends	none	friends	none	friends	friends┋family member	family member┋friends	friends┋family member	family member┋friends	friends┋family member	none	friends┋family member	family member┋friends	friends┋family member	family member	none	friends┋family member	none	friends┋family member	family member┋friends	friends┋family member	family member┋friends	none	friends┋family member	family member
243	2015/3/25 11:37:09	93seconds	111.31.240.162(天津-天津)	WeChat	male	<=30	notComputer	family member	family member	family member	family member	family member	family member	family member	family member	family member	family member	family member	family member	family member	family member	family member	family member	family member	family member	family member	family member	family member	family member	family member	family member	family member	family member	family member	family member	family member	family member
244	2015/3/25 11:48:39	127seconds	112.36.228.232(山东-济南)	Mobile Phone	male	<=30	notComputer	none	none	none	none	none	none	none	friends┋family member	none	none	friends┋family member	family member┋friends	friends┋family member	family member┋friends	friends┋family member	none	friends┋family member	family member┋friends	friends┋family member	family member	friends┋family member	family member┋friends	none	none	none	none	none	none	friends	none
245	2015/3/25 11:51:59	40seconds	221.232.151.69(湖北-武汉)	Recommender System	male	<=30	notComputer	family member	friends	family member	friends	family member	friends	family member	strangers	strangers	family member	friends	friends	family member	strangers	family member	strangers	family member	strangers	none	none	strangers	family member	friends	strangers	friends	strangers	none	strangers	family member	strangers
246	2015/3/25 12:33:59	116seconds	101.83.209.252(上海-上海)	Mobile Phone	male	<=30	notComputer	friends┋family member	friends	friends	friends┋family member	friends	friends┋family member	family member┋friends	friends┋family member	family member┋friends	friends┋family member	family member	friends┋family member	family member	friends┋family member	family member	friends┋family member	family member	family member	family member	family member	family member	friends	friends	friends┋family member	family member┋friends	family member	friends	family member	friends┋family member	family member
247	2015/3/25 12:40:20	160seconds	211.67.48.244(湖北-武汉)	Mobile Phone	male	<=30	notComputer	none	none	none	friends	friends┋family member┋strangers	friends	none	friends┋family member	friends	friends	friends┋family member┋strangers	friends┋family member	family member┋friends	friends	friends┋family member	friends	friends┋family member┋strangers	friends┋family member┋strangers	friends┋family member┋strangers	none	friends┋family member┋strangers	friends	friends┋family member┋strangers	none	strangers	strangers┋friends	friends┋strangers	strangers┋friends	none	none
248	2015/3/25 12:41:32	51seconds	59.37.161.173(广东-江门)	Recommender System	male	<=30	notComputer	friends┋family member	none	none	none	none	none	none	none	none	none	none	none	none	none	none	none	none	none	none	none	none	none	none	none	none	none	none	none	none	none
250	2015/3/25 13:14:39	137seconds	140.207.49.51(上海-上海)	Recommender System	male	<=30	notComputer	family member	family member	family member	none	none	none	none	none	none	none	friends┋family member┋strangers	friends┋family member┋strangers	family member	friends┋family member	none	friends┋family member┋strangers	none	none	none	none	friends┋family member┋strangers	friends┋family member┋strangers	friends┋family member┋strangers	none	friends┋family member┋strangers	friends┋family member┋strangers	friends┋family member┋strangers	none	none	none
251	2015/3/25 13:17:45	119seconds	117.177.110.161(四川-绵阳)	Mobile Phone	male	<=30	notComputer	none	friends┋family member┋strangers	none	none	none	none	none	friends┋family member┋strangers	none	none	none	none	none	none	none	none	none	none	none	none	none	none	none	none	none	none	none	none	none	none
252	2015/3/25 13:31:53	162seconds	113.24.154.25(山西-长治)	Mobile Phone	femaile	<=30	notComputer	friends┋family member	family member┋strangers┋friends	family member┋friends	none	none	none	none	friends┋family member┋strangers	friends┋family member┋strangers	none	friends┋family member	family member	family member	family member	family member	friends┋family member	family member┋friends	friends┋family member	family member┋friends	family member	friends┋family member	family member	friends┋family member	family member	friends┋family member┋strangers	friends┋family member	family member┋friends	none	none	family member
253	2015/3/25 15:01:54	49seconds	159.226.25.109(北京-北京)	Recommender System	male	<=30	notComputer	none	none	none	none	none	none	none	none	none	none	none	none	none	none	none	none	none	none	none	none	none	none	none	none	none	none	none	none	none	none
254	2015/3/25 15:26:20	116seconds	59.50.109.186(海南-海口)	Mobile Phone	male	<=30	notComputer	none	none	none	none	none	none	none	none	none	none	none	none	none	none	none	none	none	none	none	none	none	none	none	none	none	none	none	none	none	none
255	2015/3/25 15:29:20	62seconds	58.20.114.22(湖南-长沙)	Recommender System	male	>30	notComputer	none	none	none	none	none	none	none	friends	friends	none	none	none	none	none	none	none	friends	friends	none	none	none	none	none	none	none	none	none	none	none	none
256	2015/3/25 15:53:37	133seconds	211.138.16.228(河南-郑州)	Mobile Phone	male	<=30	notComputer	family member	friends	friends	none	friends	none	none	friends┋family member	none	none	friends	friends┋family member	family member┋friends	friends┋family member	family member┋friends	none	friends┋family member	family member┋strangers┋friends	family member┋friends	none	friends┋family member	family member┋friends	friends┋family member	family member┋friends	friends┋family member	family member	friends	strangers	none	family member
257	2015/3/25 15:53:39	110seconds	218.57.142.102(山东-济南)	Recommender System	male	<=30	notComputer	none	friends┋family member	family member	none	friends┋family member	none	friends┋family member	family member┋friends	friends	friends	friends┋family member	family member	family member	family member	family member	friends┋family member	family member┋friends	friends┋family member┋strangers	friends┋family member	family member	friends┋family member┋strangers	family member	friends┋family member	family member	family member	family member	friends┋family member┋strangers	family member	none	none
259	2015/3/25 16:00:20	57seconds	112.25.140.34(江苏-苏州)	Recommender System	male	<=30	notComputer	friends┋family member	family member┋friends	friends┋family member	family member┋friends	friends┋family member	family member┋friends	friends┋family member	family member┋friends	friends┋family member	family member┋friends	friends┋family member	family member┋friends	friends┋family member	family member┋friends	friends┋family member	family member┋friends	friends┋family member	family member┋friends	friends┋family member	family member┋friends	family member	friends┋family member	family member┋friends	friends┋family member	family member┋friends	friends┋family member	family member┋friends	friends┋family member	family member┋friends	friends┋family member
260	2015/3/25 16:01:11	94seconds	221.234.146.10(湖北-武汉)	Recommender System	male	<=30	Computer	friends┋family member	family member┋friends	friends┋family member	family member┋friends	friends┋family member	family member┋friends	friends┋family member	family member┋friends	friends┋family member	family member	friends┋family member┋strangers	friends┋family member┋strangers	friends┋family member┋strangers	friends┋family member	family member	friends┋family member┋strangers	friends┋family member┋strangers	friends┋family member┋strangers	friends┋family member┋strangers	family member	friends┋family member┋strangers	friends┋family member	family member┋strangers┋friends	family member┋friends	friends┋family member	family member┋friends	friends┋family member	family member┋friends	friends┋family member	family member
261	2015/3/25 16:03:32	43seconds	112.25.140.34(江苏-苏州)	Recommender System	male	<=30	notComputer	family member	family member	family member	family member	family member	family member	family member	family member	family member	family member	family member	family member	family member	family member	family member	family member	family member	family member	family member	family member	family member	family member	family member	family member	family member	family member	family member	family member	family member	family member
262	2015/3/25 16:07:33	103seconds	218.58.59.238(山东-青岛)	Recommender System	femaile	<=30	notComputer	friends┋family member	family member┋friends	friends┋family member	none	none	none	none	friends┋family member	none	none	friends┋family member┋strangers	friends┋family member	family member┋friends	friends┋family member	none	none	friends┋family member	family member┋strangers┋friends	family member┋strangers┋friends	none	friends┋family member┋strangers	none	none	friends┋family member	none	friends┋family member	family member┋friends	none	none	none
264	2015/3/25 16:28:10	66seconds	221.226.120.246(江苏-南京)	Recommender System	male	<=30	notComputer	none	none	none	none	none	none	none	none	none	none	none	none	none	none	none	none	none	none	none	none	none	none	none	none	none	none	none	none	none	none
265	2015/3/25 16:33:33	80seconds	111.225.126.127(河北-保定)	Mobile Phone	femaile	<=30	notComputer	none	none	none	strangers	strangers	friends	strangers	friends	strangers	strangers	strangers	friends	strangers	strangers	friends	strangers	friends	strangers	friends	friends	strangers	friends	strangers	strangers	friends	strangers	friends	strangers	friends	strangers
266	2015/3/25 16:45:09	63seconds	221.212.116.7(黑龙江-哈尔滨)	Recommender System	male	<=30	notComputer	friends	friends	friends	friends	friends	friends	friends	friends	friends	friends	friends	friends	friends	friends	friends	friends	friends	friends	friends	friends	friends	friends	friends	friends	friends	friends	friends	friends	friends	friends
267	2015/3/25 17:39:03	113seconds	221.238.159.212(天津-天津)	Recommender System	male	<=30	notComputer	none	none	none	none	none	family member	friends	friends	friends	family member	friends	friends	friends	friends	family member	none	friends	friends	friends	none	family member	family member	friends	friends	friends	friends	friends	friends	none	none
268	2015/3/25 17:47:12	42seconds	111.31.242.4(天津-天津)	Mobile Phone	male	<=30	Computer	family member	family member	family member	family member	family member	family member	family member	family member	family member	family member	family member	family member	family member	family member	family member	family member	family member	family member	family member	family member	family member	family member	family member	family member	family member	family member	family member	family member	family member	family member
269	2015/3/25 17:58:03	88seconds	60.221.244.102(山西-临汾)	Poster Link	femaile	>30	notComputer	friends┋family member	family member┋friends	friends┋family member	family member┋friends	friends┋family member	family member┋friends	friends┋family member	family member┋friends	family member	family member	family member	family member	friends┋family member	family member┋friends	family member	family member	friends┋family member	family member┋friends	friends┋family member┋strangers	family member	friends┋family member	family member	family member	family member	family member	friends┋family member	family member┋friends	family member	family member	family member
270	2015/3/25 18:06:06	46seconds	122.205.66.44(湖北-武汉)	Recommender System	male	<=30	notComputer	none	none	none	none	none	none	none	none	none	none	none	none	none	none	none	none	none	none	none	none	none	none	none	none	none	none	none	none	none	none
271	2015/3/25 18:06:45	107seconds	121.31.251.139(广西-贵港)	Mobile Phone	male	<=30	notComputer	friends┋family member	friends	friends	friends	friends	friends	friends	friends	friends	friends	friends	friends	friends	friends	friends	friends	friends	friends┋family member	family member	family member	friends	friends	friends	friends	family member	friends	friends	friends	friends	friends
272	2015/3/25 18:21:54	101seconds	111.14.137.76(山东-泰安)	Mobile Phone	male	<=30	notComputer	family member	friends┋family member	family member┋friends	friends	friends	family member	family member	family member	family member	family member	family member	family member	family member	family member	family member	family member	family member	friends┋family member	family member	family member	friends┋family member	family member	family member	friends┋family member	family member┋friends	friends┋family member	family member┋friends	family member	family member	family member
273	2015/3/25 18:28:58	173seconds	42.239.106.199(河南-商丘)	Mobile Phone	male	<=30	notComputer	none	none	none	friends	friends	friends	none	friends	none	none	friends┋family member	family member┋strangers┋friends	family member┋friends	friends┋family member	none	none	friends┋family member	family member┋friends	family member	family member	none	none	none	none	friends┋family member	friends	friends	none	friends	family member
274	2015/3/25 18:31:52	155seconds	117.136.30.24(重庆-重庆)	Mobile Phone	male	<=30	notComputer	friends┋family member	family member┋friends	friends┋family member	family member┋friends	strangers┋family member	family member	family member	friends┋family member	family member┋friends	friends┋family member	family member┋friends	friends┋family member	family member┋friends	friends┋family member	family member┋friends	friends┋family member	family member┋friends	friends┋family member	family member┋friends	family member	none	none	none	none	none	friends	friends┋family member	none	none	none
275	2015/3/25 18:51:40	71seconds	101.71.255.2(浙江-杭州)	Recommender System	male	<=30	Computer	none	none	friends	none	none	none	strangers	strangers	friends	friends	strangers	strangers	strangers	friends	friends	none	none	none	none	none	none	none	none	none	none	none	none	none	none	none
276	2015/3/25 19:21:34	188seconds	117.136.60.61(北京-北京)	Mobile Phone	male	<=30	notComputer	friends	none	none	none	friends	friends	none	friends	none	none	friends┋family member┋strangers	friends┋family member┋strangers	friends┋family member┋strangers	friends┋family member	family member┋friends	friends	friends┋family member	family member┋friends	friends┋family member	family member	friends┋family member	friends	friends┋family member	family member┋friends	friends┋family member	friends	friends	friends┋family member	none	none
280	2015/3/25 20:19:10	126seconds	106.120.105.2(北京-北京)	Mobile Phone	male	<=30	notComputer	friends	friends	none	friends┋family member	friends	friends	family member	friends	family member	friends	friends┋family member┋strangers	friends┋family member	family member┋friends	friends┋family member	family member	friends┋family member┋strangers	friends┋family member	family member┋strangers┋friends	family member┋friends	family member	friends┋family member	family member┋friends	friends┋family member	family member	family member	family member	friends┋family member	friends	none	none
281	2015/3/25 20:49:22	126seconds	112.13.121.174(浙江-绍兴)	Mobile Phone	femaile	<=30	notComputer	family member	family member	none	family member	friends	none	none	friends┋family member	family member┋friends	friends┋family member	family member┋friends	friends┋family member	family member┋friends	friends┋family member	family member┋friends	none	friends┋family member	family member┋friends	none	none	family member	family member	none	family member	family member	friends┋family member	family member┋friends	friends┋family member	none	family member
283	2015/3/25 21:26:15	159seconds	39.176.57.4(北京-北京)	Mobile Phone	male	<=30	notComputer	family member	friends	strangers	none	friends	family member	friends	strangers	none	strangers	friends	family member	friends	friends	friends	strangers	friends	strangers	friends	strangers	none	strangers	friends	friends	friends	strangers	strangers	strangers	friends	friends
284	2015/3/25 21:54:21	158seconds	123.64.8.24(广东-广州)	Mobile Phone	male	<=30	notComputer	friends┋family member	family member┋strangers┋friends	none	none	friends	none	friends	friends┋family member	family member┋friends	friends┋family member	family member┋strangers┋friends	family member┋strangers┋friends	family member┋friends	friends┋family member	family member	friends┋family member	family member┋strangers┋friends	family member┋strangers┋friends	family member┋friends	family member	friends┋family member	family member┋friends	friends┋family member	family member	friends┋family member	friends	friends	friends┋family member	none	family member
285	2015/3/25 22:02:05	55seconds	222.89.114.18(河南-开封)	Recommender System	male	<=30	notComputer	friends┋family member	family member┋friends	friends┋family member	family member┋friends	friends┋family member	family member┋friends	friends┋family member	family member┋friends	friends┋family member	family member┋friends	friends┋family member	family member┋friends	friends┋family member	family member┋friends	friends┋family member	family member┋friends	friends┋family member	family member┋friends	friends┋family member	family member┋friends	friends┋family member	family member┋friends	friends┋family member	family member┋friends	friends┋family member	family member┋friends	friends┋family member	family member┋friends	friends┋family member	family member┋friends
286	2015/3/25 22:05:17	78seconds	219.147.0.10(山东-淄博)	Recommender System	male	<=30	notComputer	none	none	none	none	friends	none	none	friends┋family member	friends	none	friends┋family member	family member┋friends	friends┋family member	family member┋friends	friends┋family member	family member┋friends	friends┋family member	family member┋friends	friends┋family member	family member┋friends	friends┋family member	friends	family member	friends	family member	friends	family member	friends	family member	friends
287	2015/3/25 22:09:08	134seconds	219.147.0.10(山东-淄博)	Recommender System	male	<=30	notComputer	none	none	none	none	friends	none	none	friends┋family member	family member┋friends	friends┋family member	family member	friends┋family member	family member┋friends	friends	friends┋family member	family member┋friends	friends	friends┋family member	family member┋friends	friends┋family member	family member┋friends	friends┋family member	family member┋friends	friends	friends	friends	friends	friends	friends	friends
288	2015/3/25 22:52:59	108seconds	124.77.23.8(上海-上海)	Recommender System	male	>30	notComputer	friends┋family member	none	friends┋family member	none	none	none	family member	none	none	none	none	none	none	family member	family member	family member	family member	family member	family member	family member	family member	family member	family member	family member	family member	family member	family member	family member	family member	family member
289	2015/3/26 0:05:55	181seconds	116.249.58.131(云南-迪庆)	Mobile Phone	male	<=30	notComputer	friends┋family member	family member┋friends	friends┋family member	none	none	none	none	friends	none	none	none	friends┋family member	friends	friends┋family member	none	none	friends┋family member	family member┋friends	friends┋family member	none	none	none	none	none	none	strangers┋friends	friends┋strangers	none	none	none
291	2015/3/26 8:12:28	127seconds	119.167.70.229(山东-青岛)	Recommender System	male	<=30	notComputer	friends	friends	none	friends	friends	friends	friends	friends	friends	friends	friends	friends	friends	friends	family member	family member	friends	friends	friends	family member	friends	friends	friends	family member	family member	strangers	friends	family member	none	family member
292	2015/3/26 8:15:51	77seconds	124.128.158.46(山东-济南)	Recommender System	femaile	<=30	notComputer	friends┋family member	family member┋friends	family member	family member	family member	none	none	friends┋family member	family member	friends┋family member	family member	none	family member	none	none	none	none	none	none	none	none	none	none	none	none	none	none	none	none	none
293	2015/3/26 8:17:27	26seconds	218.76.50.10(湖南-长沙)	Recommender System	male	<=30	notComputer	friends	friends	friends	friends	friends	friends	friends	friends	friends	friends	friends	friends	friends	friends	friends	friends	friends	friends	friends	friends	friends	friends	friends	friends	friends	friends	friends	friends	friends	friends
294	2015/3/26 8:17:59	125seconds	182.112.237.82(河南-周口)	Mobile Phone	male	<=30	notComputer	none	none	none	none	none	none	none	none	none	none	none	none	none	none	none	none	none	none	none	none	none	none	none	none	none	none	none	none	none	none
295	2015/3/26 8:19:52	55seconds	101.68.71.22(浙江-杭州)	Recommender System	male	>30	notComputer	family member	friends	friends	family member	friends	friends	friends	friends	friends	friends	friends	friends	friends	friends	friends	friends	friends	friends	friends	family member	friends	friends	friends	friends	friends	friends	friends	friends	friends	friends
296	2015/3/26 8:21:23	112seconds	218.27.205.73(吉林-延边)	Recommender System	femaile	<=30	notComputer	none	none	none	none	none	none	none	friends	friends	none	none	none	none	none	none	none	none	none	none	none	none	none	none	none	none	none	none	none	none	none
297	2015/3/26 8:23:56	192seconds	117.112.62.40(北京-北京)	Mobile Phone	femaile	<=30	notComputer	friends┋family member	none	none	friends┋family member	family member┋strangers┋friends	family member┋friends	none	friends┋family member	family member┋friends	friends┋family member┋strangers	friends┋family member	strangers	friends┋family member	family member┋friends	friends┋family member	family member┋strangers┋friends	family member	friends┋family member	none	family member	strangers	none	friends┋family member┋strangers	none	friends┋family member	none	none	none	none	none
298	2015/3/26 8:27:32	54seconds	58.23.8.148(福建-厦门)	Recommender System	male	<=30	notComputer	none	none	none	none	none	none	none	none	none	none	none	none	none	none	none	none	none	none	none	none	none	none	none	none	none	none	none	none	none	none
299	2015/3/26 8:29:19	220seconds	27.8.208.212(重庆-重庆)	Recommender System	male	>30	notComputer	none	none	strangers	none	none	friends	friends┋family member	family member┋friends	none	family member	family member	friends	family member	friends┋family member	family member	family member	family member	friends┋family member	family member	family member	none	family member	family member	family member	family member	none	none	family member	none	family member
300	2015/3/26 8:29:41	166seconds	42.103.125.95(黑龙江-哈尔滨)	Mobile Phone	femaile	<=30	notComputer	none	none	none	friends┋family member	friends	none	none	friends┋family member	none	none	friends┋family member	family member┋friends	friends┋family member	family member┋friends	friends┋family member	family member┋friends	friends┋family member┋strangers	friends┋family member┋strangers	friends┋family member┋strangers	none	none	none	none	family member	friends┋family member	none	none	none	none	none
301	2015/3/26 8:31:43	59seconds	27.25.137.174(湖北-十堰)	Recommender System	male	<=30	notComputer	none	none	none	none	none	none	none	none	none	none	none	none	none	none	none	none	none	none	none	none	none	none	none	none	none	strangers	strangers	strangers	strangers	strangers
302	2015/3/26 8:33:51	77seconds	42.103.118.43(黑龙江-哈尔滨)	Mobile Phone	femaile	<=30	notComputer	friends	friends	none	none	none	none	friends	strangers	none	none	friends	friends	family member	none	none	none	none	none	none	none	none	none	none	none	none	none	none	none	none	none
303	2015/3/26 8:43:49	83seconds	123.232.100.103(山东-济南)	Mobile Phone	femaile	<=30	notComputer	none	family member	none	none	none	none	none	none	none	none	strangers	none	none	none	none	none	none	none	none	none	none	none	none	none	none	none	none	none	none	none
304	2015/3/26 8:47:20	167seconds	180.95.224.35(甘肃-兰州)	Recommender System	male	<=30	notComputer	friends┋family member	family member┋strangers┋friends	family member┋strangers	friends┋family member┋strangers	friends┋family member	family member┋friends	friends┋family member	family member┋friends	friends┋family member┋strangers	friends┋family member	family member┋friends	friends┋family member	family member┋friends	friends┋family member	family member┋friends	friends┋family member	family member	friends┋family member	family member┋friends	friends┋family member	family member┋friends	friends┋family member	family member┋friends	friends┋family member	family member┋friends	friends┋family member	family member┋friends	friends┋family member	family member┋friends	friends┋family member
305	2015/3/26 8:47:32	142seconds	42.48.30.15(湖南-长沙)	Recommender System	male	<=30	notComputer	friends	friends	friends	none	friends┋family member┋strangers	none	none	friends┋family member	none	friends┋family member	family member┋strangers┋friends	family member┋strangers┋friends	family member┋friends	friends┋family member	family member┋friends	friends┋family member┋strangers	friends┋family member	family member┋strangers┋friends	family member┋strangers┋friends	none	friends	friends	friends┋family member┋strangers	friends┋family member	family member┋friends	friends┋family member┋strangers	friends┋family member┋strangers	none	none	none
306	2015/3/26 8:48:53	70seconds	211.167.248.2(北京-北京)	Recommender System	femaile	<=30	notComputer	none	none	none	none	none	none	none	none	none	none	none	none	none	none	none	none	none	none	none	none	none	none	none	none	none	none	none	none	none	none
307	2015/3/26 8:53:23	162seconds	115.33.54.40(北京-北京)	Mobile Phone	femaile	<=30	notComputer	family member	family member	family member	friends┋family member	family member┋friends	none	none	friends┋family member	family member┋friends	friends┋family member	family member┋friends	friends┋family member	family member┋friends	friends┋family member	family member	friends┋family member	family member┋friends	friends┋family member┋strangers	friends┋family member	family member	friends┋family member┋strangers	friends┋family member	friends	friends┋family member	family member┋friends	friends┋family member	family member┋friends	family member	none	none
308	2015/3/26 8:53:44	126seconds	218.76.48.26(湖南-长沙)	Recommender System	male	<=30	notComputer	friends	friends	none	none	none	none	none	friends	none	none	none	friends	friends	friends	none	none	none	none	none	none	none	friends	friends	none	none	none	none	none	none	none
309	2015/3/26 8:54:03	51seconds	101.75.129.61(河北-未知)	Recommender System	male	<=30	notComputer	none	none	none	none	none	none	none	none	none	none	none	none	none	none	none	none	none	none	none	none	none	none	none	none	none	none	none	none	none	none
310	2015/3/26 8:54:36	206seconds	175.17.148.131(吉林-吉林)	Recommender System	male	>30	Computer	none	none	family member	friends┋family member	friends	friends┋family member	family member┋friends	friends	friends┋family member	family member┋strangers┋friends	none	friends┋family member	none	none	none	none	friends┋family member	family member┋friends	friends┋family member	none	friends┋family member	none	none	friends┋family member	family member┋friends	friends┋family member┋strangers	friends┋family member	none	none	family member
311	2015/3/26 8:56:06	186seconds	183.230.17.172(重庆-重庆)	Recommender System	male	>30	notComputer	friends	none	none	none	none	none	none	none	none	none	none	friends	friends	friends	none	none	friends	friends	none	none	none	none	none	none	none	none	none	none	none	none
312	2015/3/26 9:02:30	192seconds	60.168.53.170(安徽-合肥)	Recommender System	male	>30	Computer	friends┋family member┋strangers	friends┋family member┋strangers	friends┋family member	family member┋strangers┋friends	family member┋friends	friends┋family member	family member┋strangers┋friends	family member┋strangers┋friends	family member┋strangers┋friends	family member┋strangers┋friends	family member┋friends	friends┋family member	family member┋strangers┋friends	family member┋strangers┋friends	family member┋friends	friends┋family member┋strangers	friends┋family member	family member┋strangers┋friends	family member┋strangers┋friends	family member┋friends	friends┋family member┋strangers	friends┋family member┋strangers	friends┋family member┋strangers	friends┋family member	family member┋strangers┋friends	family member┋strangers┋friends	family member┋strangers┋friends	family member┋friends	friends┋family member┋strangers	friends┋family member┋strangers
313	2015/3/26 9:08:32	126seconds	183.136.65.40(浙江-台州)	Recommender System	male	<=30	notComputer	none	none	none	none	friends	none	none	friends	none	none	friends	friends	none	none	none	none	none	friends	none	none	friends	none	none	none	none	friends	friends	none	none	none
314	2015/3/26 9:09:22	105seconds	221.208.90.170(黑龙江-哈尔滨)	Mobile Phone	femaile	<=30	notComputer	friends	friends	friends	friends	friends	friends	friends	strangers┋friends	friends	friends	friends	friends	friends	friends	friends	friends	friends┋family member	family member┋friends	friends┋family member	family member┋friends	friends┋family member	family member┋friends	friends┋family member	friends	friends┋family member	friends	friends	friends	friends	friends┋family member
315	2015/3/26 9:10:05	519seconds	219.243.84.235(天津-天津)	Recommender System	male	<=30	notComputer	none	none	family member	friends	friends	friends	family member	family member	family member	none	family member	none	family member	family member	family member	friends┋family member	family member	family member	family member	family member	none	none	none	none	family member	family member	family member	family member	family member	family member
316	2015/3/26 9:10:16	138seconds	61.183.227.8(湖北-武汉)	Recommender System	male	>30	notComputer	none	none	none	none	none	none	none	friends┋family member	none	none	friends┋family member	family member┋friends	none	friends┋family member	family member	friends┋family member	family member┋friends	friends┋family member	family member┋friends	family member	friends┋family member	family member	none	friends┋family member	family member┋friends	friends┋family member	family member┋friends	none	none	none
317	2015/3/26 9:11:43	84seconds	58.155.211.27(辽宁-大连)	Recommender System	femaile	<=30	notComputer	family member	family member	family member	none	none	none	none	friends┋family member	none	friends	friends┋family member	family member	family member	family member	family member	friends┋family member	family member	family member	family member	family member	family member	family member	family member	family member	family member	family member	family member	family member	none	none
318	2015/3/26 9:13:05	68seconds	180.85.0.199(四川-成都)	Recommender System	femaile	<=30	notComputer	friends┋family member┋strangers	friends┋family member┋strangers	friends┋family member	family member┋friends	friends┋family member	family member┋friends	friends┋family member	family member┋friends	friends┋family member	family member┋friends	friends┋family member	family member┋friends	friends┋family member	family member┋friends	friends┋family member	family member┋friends	friends┋family member	family member┋friends	friends┋family member	family member┋friends	friends┋family member┋strangers	friends┋family member	family member┋friends	friends┋family member	family member┋friends	friends┋family member	family member┋friends	friends┋family member	family member┋friends	friends┋family member
319	2015/3/26 9:15:17	47seconds	218.22.21.23(安徽-合肥)	Recommender System	male	<=30	notComputer	none	family member	family member	family member	family member	family member	family member	family member	family member	family member	family member	family member	family member	family member	family member	family member	family member	family member	family member	family member	family member	family member	family member	family member	family member	family member	family member	family member	family member	family member
320	2015/3/26 9:18:33	119seconds	115.57.254.164(河南-郑州)	Recommender System	male	>30	notComputer	friends	family member	friends	friends	friends	friends	friends	friends	friends	family member	friends	friends	friends	friends	friends	friends	friends	friends	friends	none	family member	friends	friends	friends	friends	friends	friends	friends	friends	friends
322	2015/3/26 9:20:21	47seconds	117.64.235.220(安徽-合肥)	Recommender System	male	<=30	notComputer	none	none	none	none	none	none	none	none	none	none	none	none	none	none	none	none	none	none	none	none	none	none	none	none	none	none	none	none	none	none
323	2015/3/26 9:20:58	44seconds	60.221.244.102(山西-临汾)	Recommender System	femaile	>30	notComputer	family member	family member	family member	family member	family member	family member	family member	family member	family member	family member	family member	family member	family member	family member	family member	family member	family member	family member	family member	family member	family member	family member	family member	family member	family member	family member	family member	family member	family member	family member
324	2015/3/26 9:26:26	227seconds	115.231.85.17(浙江-金华)	Mobile Phone	femaile	<=30	notComputer	family member	family member	none	family member	family member	none	none	friends┋family member	none	friends	friends┋family member┋strangers	friends┋family member	family member	friends┋family member	family member	friends┋family member┋strangers	friends┋family member	family member┋friends	family member	family member	friends┋family member	family member┋friends	friends┋family member┋strangers	friends┋family member	family member┋friends	friends┋family member┋strangers	friends┋family member┋strangers	family member	family member	family member
325	2015/3/26 9:26:59	149seconds	159.226.89.2(北京-北京)	Recommender System	male	<=30	notComputer	family member	friends	friends	strangers	strangers┋family member	family member	family member	none	friends	friends	family member	family member	strangers	family member	family member	none	family member	strangers	family member	family member	friends	family member	strangers	family member	none	strangers	family member	friends	strangers	friends
326	2015/3/26 9:28:24	148seconds	220.249.94.142(湖北-武汉)	Recommender System	male	>30	notComputer	none	none	none	friends┋family member	family member┋friends	none	none	friends┋family member	none	none	none	none	none	none	none	none	none	none	none	none	none	none	none	none	none	none	none	none	none	none
327	2015/3/26 9:29:28	112seconds	221.2.68.19(山东-临沂)	Recommender System	femaile	>30	notComputer	family member	family member	none	family member	none	none	none	friends┋family member	family member	family member	friends┋family member	family member┋friends	friends┋family member	family member┋friends	friends┋family member	family member┋friends	friends┋family member	family member┋friends	friends┋family member	family member	friends┋family member	family member┋friends	friends┋family member	family member┋friends	friends┋family member	family member┋friends	friends┋family member	family member┋friends	family member	friends┋family member
328	2015/3/26 9:30:22	126seconds	61.157.97.83(四川-绵阳)	Mobile Phone	femaile	<=30	notComputer	friends	friends	family member	family member	strangers┋friends	none	friends	none	none	none	friends┋family member	friends	friends	friends	none	friends	none	friends	none	none	none	none	family member	none	friends	friends	friends	none	none	none
329	2015/3/26 9:31:18	213seconds	120.219.232.71(北京-北京)	Mobile Phone	femaile	<=30	notComputer	friends	none	none	friends	friends┋family member	none	none	friends┋family member	none	none	friends┋family member	family member┋friends	friends┋family member	family member┋friends	friends┋family member	none	friends┋family member	family member┋friends	family member	family member	strangers┋friends	family member┋friends	friends┋family member┋strangers	friends┋family member	family member	friends┋family member┋strangers	friends┋family member┋strangers	friends┋family member	family member	none
330	2015/3/26 9:31:34	215seconds	113.140.6.195(陕西-西安)	Recommender System	male	>30	notComputer	none	family member	family member	family member	none	none	none	friends┋family member	family member┋friends	none	friends┋family member	family member┋friends	friends┋family member	family member┋strangers┋friends	family member	friends┋family member	family member┋friends	friends┋family member┋strangers	friends┋family member┋strangers	family member	friends┋family member┋strangers	family member	friends┋family member	family member	friends┋family member┋strangers	friends┋family member	family member┋friends	family member	none	family member
331	2015/3/26 9:33:48	38seconds	119.167.110.110(山东-青岛)	Recommender System	male	>30	notComputer	family member	family member	family member	family member	family member	family member	family member	family member	family member	family member	family member	family member	family member	family member	family member	family member	family member	family member	family member	family member	family member	family member	family member	family member	family member	family member	family member	family member	family member	family member
332	2015/3/26 9:33:52	135seconds	117.136.30.98(重庆-重庆)	Mobile Phone	femaile	<=30	notComputer	family member	friends┋family member	family member┋friends	none	none	none	none	friends┋family member	none	none	friends┋family member	family member┋friends	friends┋family member	family member┋friends	family member	friends┋family member	family member┋friends	friends┋family member	family member┋friends	family member	friends┋family member	family member┋friends	family member	friends┋family member	family member┋friends	friends┋family member	family member┋friends	friends┋family member	none	family member
333	2015/3/26 9:34:08	115seconds	220.170.143.11(湖南-郴州)	Recommender System	male	<=30	notComputer	friends	friends	none	friends	friends	friends	none	family member	family member	friends	friends	friends	friends	friends	friends	friends	friends	friends	friends	family member	friends	friends	friends	family member	friends	friends	friends	friends	friends	friends
334	2015/3/26 9:36:35	91seconds	115.236.9.84(浙江-杭州)	Recommender System	male	<=30	notComputer	friends┋family member	none	none	none	none	none	none	none	none	friends┋family member	none	family member	none	none	family member	none	family member	friends┋family member	none	none	none	none	none	none	family member	family member	family member	none	none	family member
335	2015/3/26 9:37:26	33seconds	119.78.98.86(北京-北京)	Recommender System	femaile	<=30	Computer	friends	strangers	friends	friends	friends	strangers	family member	family member	friends	family member	family member	family member	friends	friends	friends	friends	family member	friends	family member	strangers	none	friends	friends	family member	family member	friends	friends	strangers	friends	family member
336	2015/3/26 9:41:13	110seconds	125.41.237.193(河南-郑州)	Mobile Phone	femaile	<=30	notComputer	family member	friends	friends	family member	family member	friends	family member	family member	family member	friends	friends	friends	family member	family member	family member	family member	friends	friends	strangers	none	friends	friends	friends	friends	friends	family member	family member	strangers	none	none
337	2015/3/26 9:41:30	104seconds	202.106.52.126(北京-北京)	Recommender System	male	<=30	Computer	family member	friends	friends┋family member	family member┋friends	friends┋family member	none	none	none	none	none	none	friends┋family member	family member┋friends	family member	family member	none	friends┋family member	family member┋friends	friends┋family member	family member	friends┋family member	family member┋friends	none	none	none	none	none	none	none	family member
338	2015/3/26 9:43:06	158seconds	123.132.15.39(山东-济宁)	Recommender System	male	<=30	notComputer	friends┋family member	family member┋friends	none	friends┋family member	friends┋strangers	none	none	friends	friends┋family member	none	strangers	strangers	friends┋family member┋strangers	friends┋family member	family member┋friends	friends	friends┋family member	family member┋friends	friends┋family member┋strangers	family member	strangers	friends	none	none	none	friends┋family member┋strangers	friends	none	none	family member
339	2015/3/26 9:45:14	222seconds	112.86.86.51(江苏-苏州)	Mobile Phone	male	<=30	notComputer	friends┋family member	family member┋strangers┋friends	family member	friends┋family member	family member┋friends	friends┋family member	family member┋friends	friends┋family member┋strangers	friends┋family member┋strangers	friends┋family member	family member┋strangers┋friends	family member┋friends	friends┋family member	family member┋friends	family member	friends┋family member┋strangers	friends┋family member	family member┋strangers┋friends	family member┋strangers┋friends	family member	friends┋family member┋strangers	friends┋family member┋strangers	friends┋family member┋strangers	family member	friends┋family member┋strangers	friends┋family member┋strangers	friends┋family member┋strangers	family member	family member	none
340	2015/3/26 9:47:56	154seconds	223.104.20.189(河南-郑州)	Mobile Phone	femaile	<=30	notComputer	family member	family member	none	friends┋family member	family member┋friends	none	none	friends┋family member	family member┋friends	none	friends┋family member	family member┋friends	family member	friends┋family member	none	friends	friends┋family member	family member┋friends	family member	none	family member	friends┋family member	family member┋strangers┋friends	none	family member	friends┋family member	family member┋friends	family member	none	none
341	2015/3/26 9:49:19	130seconds	58.213.51.41(江苏-南京)	Recommender System	male	<=30	notComputer	family member	family member	family member	none	friends┋family member	family member┋friends	none	family member	none	none	none	family member	family member	family member	none	none	none	family member	family member	none	friends	family member	none	family member	friends┋family member	none	none	none	none	family member
342	2015/3/26 9:49:58	181seconds	112.65.124.206(上海-上海)	Mobile Phone	femaile	<=30	notComputer	friends	friends	none	family member	family member	none	friends	friends	none	none	family member	friends	friends	friends	friends	friends	friends	friends	friends	none	friends	friends	friends	none	friends┋family member	friends	friends	friends	none	none
343	2015/3/26 9:51:23	100seconds	223.104.20.189(河南-郑州)	Mobile Phone	femaile	<=30	notComputer	family member	family member	none	friends┋family member	family member┋friends	none	none	friends┋family member	family member┋friends	none	friends┋family member	family member┋friends	friends┋family member	family member┋friends	none	family member	friends┋family member	family member┋friends	none	none	friends┋family member	family member┋friends	friends┋family member┋strangers	family member	family member	friends	friends	friends	none	none
344	2015/3/26 9:56:59	93seconds	111.161.26.10(天津-天津)	Recommender System	femaile	>30	notComputer	friends┋family member	family member┋friends	friends	friends	friends	friends	friends	friends	friends	friends	friends	friends┋family member	family member┋friends	friends┋family member	family member┋friends	friends┋family member	family member┋friends	friends	friends┋family member	family member┋friends	friends┋family member	family member┋friends	friends┋family member	friends	friends	friends┋family member	family member┋friends	friends	friends	friends┋family member
345	2015/3/26 10:00:19	67seconds	61.138.177.10(吉林-长春)	Recommender System	femaile	<=30	notComputer	family member	family member	friends	friends	strangers	strangers	friends	friends	friends	family member	friends	family member	family member	family member	family member	friends	friends	friends	friends	family member	friends	family member	friends	friends	friends	family member	friends	family member	friends	family member
346	2015/3/26 10:00:43	170seconds	117.136.11.82(福建-福州)	Mobile Phone	femaile	<=30	notComputer	family member	family member	family member	friends	friends	friends	none	friends┋family member	none	none	friends	friends┋family member	family member	friends┋family member	family member	friends┋family member	family member┋friends	friends┋family member	family member┋friends	family member	friends┋family member	family member┋friends	friends┋family member	family member┋friends	friends┋family member	family member┋friends	friends┋family member	friends	none	family member
347	2015/3/26 10:01:20	108seconds	111.175.187.112(湖北-武汉)	Recommender System	male	<=30	notComputer	friends┋family member	none	none	friends┋family member	family member┋friends	none	none	friends┋family member	none	friends┋family member	family member┋friends	friends┋family member	family member┋friends	none	none	friends┋family member	family member┋strangers┋friends	family member┋strangers┋friends	family member┋friends	none	none	none	friends┋family member	family member┋friends	friends┋family member	family member┋friends	friends┋family member	none	none	none
348	2015/3/26 10:04:29	106seconds	171.113.194.118(湖北-武汉)	Mobile Phone	femaile	<=30	notComputer	friends┋family member	family member┋friends	friends┋family member	family member┋friends	none	none	none	none	none	none	none	none	none	none	none	friends┋family member┋strangers	none	friends┋family member┋strangers	none	none	none	none	none	none	none	friends┋family member┋strangers	friends┋family member┋strangers	none	none	none
350	2015/3/26 10:10:38	94seconds	182.119.78.240(河南-洛阳)	Recommender System	male	>30	notComputer	family member	friends	none	friends	none	none	none	none	friends	friends	friends┋family member	friends┋strangers	strangers	friends┋family member┋strangers	none	none	strangers┋friends	friends┋strangers	none	family member	none	none	none	friends┋family member	none	none	none	none	none	none
351	2015/3/26 10:13:46	136seconds	110.53.81.253(湖南-衡阳)	Mobile Phone	male	<=30	notComputer	friends┋family member	family member┋strangers┋friends	family member┋friends	family member	none	friends┋family member┋strangers	friends┋family member	family member┋strangers┋friends	friends	friends	friends┋family member┋strangers	friends┋family member┋strangers	none	friends┋family member	family member	friends┋family member┋strangers	friends┋family member┋strangers	friends┋family member┋strangers	friends┋family member┋strangers	family member	friends┋family member┋strangers	friends┋family member	family member┋strangers┋friends	none	none	friends┋family member┋strangers	friends┋family member┋strangers	friends┋family member	family member┋friends	none
352	2015/3/26 10:15:14	184seconds	115.60.10.219(河南-郑州)	Recommender System	femaile	<=30	notComputer	friends┋family member	family member┋friends	none	none	friends┋family member	family member┋friends	none	friends┋family member	friends	friends┋family member	family member┋friends	friends┋family member	family member┋friends	friends┋family member	family member┋friends	friends┋family member	family member┋friends	friends┋family member	family member┋friends	family member	strangers	friends┋family member	strangers	friends┋family member	strangers	strangers	strangers	friends┋family member	family member┋friends	friends┋family member
353	2015/3/26 10:17:33	121seconds	221.2.68.19(山东-临沂)	Recommender System	male	<=30	notComputer	friends┋family member	family member┋strangers┋friends	none	friends┋family member	family member	none	none	friends┋family member	none	none	family member	family member	family member	family member	family member	family member	family member	friends┋family member	family member┋friends	none	none	family member	none	none	family member	family member	family member	family member	none	none
354	2015/3/26 10:18:37	51seconds	124.130.168.10(山东-泰安)	Recommender System	male	<=30	notComputer	family member	family member	friends	family member	family member	family member	family member	family member	family member	family member	family member	family member	family member	friends┋family member	family member┋friends	family member	family member	family member	family member	family member	family member	family member	family member	friends	family member	family member	family member	family member	family member	family member
355	2015/3/26 10:20:00	53seconds	219.243.215.212(北京-北京)	Recommender System	femaile	<=30	notComputer	family member	friends	family member	friends	friends	friends	family member	friends	friends	friends	friends	family member	family member	family member	family member	family member	family member	family member	family member	family member	friends	family member	family member	family member	friends	family member	friends┋family member	family member	family member	friends
356	2015/3/26 10:21:39	55seconds	175.166.17.155(辽宁-本溪)	Recommender System	male	<=30	notComputer	none	none	none	none	none	none	none	none	none	none	none	none	none	none	none	none	none	none	none	none	none	none	none	none	none	none	none	none	none	none
359	2015/3/26 10:28:59	67seconds	182.37.236.188(山东-临沂)	Mobile Phone	male	<=30	notComputer	none	none	none	none	none	none	none	none	none	none	none	none	none	none	none	none	none	none	none	none	none	none	none	none	none	none	none	none	none	none
360	2015/3/26 10:31:51	85seconds	117.136.20.164(安徽-合肥)	Mobile Phone	male	<=30	Computer	family member	friends┋family member	family member┋friends	friends	friends┋family member	family member┋friends	friends	friends	strangers	friends	strangers┋friends	friends	friends	strangers	strangers	strangers	friends	friends	friends	friends	friends	friends	friends	strangers	strangers	strangers┋family member	family member┋friends	friends┋family member	family member┋friends	friends┋family member
361	2015/3/26 10:34:40	368seconds	222.82.246.50(新疆-乌鲁木齐)	Recommender System	femaile	<=30	notComputer	family member	family member	none	none	family member	none	none	none	none	none	none	none	none	none	none	family member	none	none	none	none	family member	none	none	none	none	none	none	none	none	none
362	2015/3/26 10:37:34	133seconds	165.21.122.226(未知-未知)	Recommender System	male	>30	notComputer	friends┋family member	family member┋friends	friends┋family member	family member┋friends	friends┋family member	none	friends┋family member	family member┋friends	friends┋family member	none	friends┋family member	family member┋friends	friends┋family member	family member┋friends	family member	friends┋family member	family member┋friends	friends┋family member	family member┋friends	none	friends┋family member	family member┋friends	none	none	none	friends┋family member	family member┋friends	none	none	none
363	2015/3/26 10:44:59	41seconds	27.17.53.80(湖北-武汉)	Recommender System	femaile	<=30	Computer	family member	family member	family member	family member	family member	family member	family member	family member	family member	none	none	none	none	none	none	none	none	none	none	none	none	none	none	none	none	none	none	none	none	none
364	2015/3/26 10:49:28	103seconds	119.165.173.46(山东-青岛)	Recommender System	male	>30	notComputer	family member	none	none	none	none	none	none	none	none	friends	friends	friends	friends	friends	family member	friends	none	friends┋family member	family member	none	none	none	none	none	friends	friends	friends	family member	none	none
365	2015/3/26 10:53:24	93seconds	42.48.187.74(湖南-长沙)	Recommender System	male	<=30	notComputer	strangers	strangers	strangers	strangers	strangers	strangers	strangers	strangers	strangers	strangers	strangers	none	none	strangers	none	strangers	none	strangers	strangers	none	strangers	none	strangers	none	none	strangers	strangers	none	none	none
366	2015/3/26 10:53:48	52seconds	210.72.12.103(上海-上海)	Recommender System	femaile	>30	notComputer	none	none	none	none	none	none	none	none	none	none	none	none	none	none	none	none	none	none	none	none	none	none	none	none	none	none	none	none	none	none
367	2015/3/26 10:54:57	76seconds	159.226.156.231(北京-北京)	Recommender System	male	<=30	notComputer	none	none	none	none	none	none	none	none	none	none	none	none	none	none	none	none	none	none	none	none	none	none	none	none	none	none	none	none	none	none
368	2015/3/26 10:58:42	68seconds	117.136.9.30(山东-济南)	Mobile Phone	male	<=30	notComputer	friends┋family member	family member	friends┋family member	family member┋friends	friends┋family member	family member┋friends	friends┋family member	family member┋friends	friends┋family member	family member┋friends	friends┋family member┋strangers	friends┋family member	family member┋strangers┋friends	family member┋strangers┋friends	family member┋friends	friends┋family member┋strangers	friends┋family member┋strangers	friends┋family member┋strangers	friends┋family member	family member┋friends	friends┋family member	family member┋friends	friends┋family member┋strangers	friends┋family member	family member┋friends	friends┋family member┋strangers	friends┋family member	family member┋strangers┋friends	family member┋friends	friends┋family member┋strangers
369	2015/3/26 11:01:35	109seconds	124.133.236.69(山东-济南)	Recommender System	male	>30	notComputer	family member	family member	none	none	none	friends	none	none	none	none	none	none	none	none	none	none	none	none	none	none	none	none	none	none	none	none	none	none	none	none
370	2015/3/26 11:02:37	79seconds	223.209.248.193(湖北-武汉)	Mobile Phone	male	<=30	notComputer	friends	friends	strangers	none	friends	friends┋family member	friends	strangers	friends┋family member	family member┋friends	friends	friends	friends	friends	friends	none	none	friends	none	family member	family member	friends	friends	family member	family member	friends	friends	friends	friends	family member
372	2015/3/26 11:09:36	39seconds	223.104.14.98(北京-北京)	Mobile Phone	male	<=30	Computer	friends	strangers┋friends	strangers	friends	friends	strangers	friends	strangers	friends	friends	strangers	strangers	strangers	friends	friends	strangers	strangers	friends	friends	strangers	strangers	strangers	strangers	strangers	strangers	strangers	friends	friends	friends	friends
373	2015/3/26 11:10:46	120seconds	116.249.58.165(云南-迪庆)	Recommender System	male	<=30	notComputer	none	family member	family member	none	none	none	family member	friends┋family member	none	none	friends┋family member	family member┋friends	family member	family member	family member	family member	family member	family member	family member	family member	friends┋family member	family member┋friends	family member	family member	friends┋family member	family member┋friends	family member	family member	none	family member
374	2015/3/26 11:16:05	89seconds	202.115.138.82(四川-成都)	Recommender System	femaile	<=30	Computer	none	none	friends┋family member	none	none	none	none	none	none	strangers	none	friends┋family member	friends	friends	none	none	none	friends┋family member	none	none	none	none	none	none	none	none	none	none	none	none
375	2015/3/26 11:17:20	39seconds	180.160.137.15(上海-上海)	Recommender System	male	<=30	Computer	family member	family member	family member	family member	family member	family member	family member	strangers┋friends	friends┋strangers	family member	strangers┋family member	family member	strangers┋family member	family member	family member	friends┋family member	family member	friends	friends	friends	strangers	strangers┋friends	friends	strangers	strangers	family member	none	strangers	friends┋family member	strangers
376	2015/3/26 11:17:53	157seconds	112.84.180.74(江苏-扬州)	Recommender System	male	>30	notComputer	friends	friends	family member	family member	friends┋family member	friends	family member	friends	friends	friends	family member	family member	family member	family member	friends┋family member	family member┋friends	friends┋family member	family member	family member	family member	family member	family member	family member	family member	friends┋family member	family member	family member	family member	family member	family member
377	2015/3/26 11:19:33	80seconds	211.161.165.19(湖北-武汉)	Recommender System	femaile	<=30	notComputer	friends┋family member	friends	family member	friends┋family member	friends	friends	friends	friends┋family member	none	friends┋family member	family member┋friends	friends┋family member	family member┋friends	friends	family member	friends	friends┋family member	family member	none	family member	friends┋family member	family member┋friends	friends┋family member	family member┋friends	friends┋family member	none	none	friends	none	none
378	2015/3/26 11:31:19	30seconds	125.83.176.125(重庆-重庆)	Recommender System	male	<=30	notComputer	none	none	none	none	none	none	none	none	none	none	none	none	none	none	none	none	none	none	none	none	none	none	none	none	none	none	none	none	none	none
379	2015/3/26 11:41:31	71seconds	223.69.113.20(北京-北京)	Recommender System	femaile	<=30	notComputer	none	friends	friends	friends	friends	friends	friends	friends	friends	friends	friends	friends	friends	friends	none	none	friends	friends	friends	none	friends	friends	friends	friends	friends	friends	friends	friends	friends	none
380	2015/3/26 11:44:46	59seconds	222.222.210.202(河北-石家庄)	Mobile Phone	male	<=30	notComputer	none	none	none	none	none	none	none	none	none	none	none	none	none	none	none	none	none	none	none	none	none	none	none	none	none	none	none	none	none	none
381	2015/3/26 11:45:26	90seconds	115.103.128.80(北京-北京)	Mobile Phone	male	<=30	notComputer	none	none	none	friends	friends	none	none	friends	friends	none	none	none	none	none	none	none	none	none	none	none	none	none	none	none	none	none	none	none	none	none
382	2015/3/26 12:10:11	121seconds	60.219.211.6(黑龙江-哈尔滨)	Mobile Phone	male	<=30	notComputer	none	friends┋family member	none	friends	friends	friends	none	friends┋family member	none	friends	friends┋family member┋strangers	friends┋family member┋strangers	friends┋family member┋strangers	friends┋family member┋strangers	family member	friends┋family member	family member┋strangers┋friends	family member┋strangers┋friends	family member┋strangers┋friends	none	none	none	none	friends┋family member	family member┋friends	friends┋family member	family member┋strangers┋friends	none	none	none
383	2015/3/26 12:21:54	119seconds	223.104.10.245(江西-南昌)	Mobile Phone	femaile	<=30	notComputer	family member	friends┋family member	family member	friends┋family member	family member┋friends	friends┋family member	family member	friends┋family member	family member┋friends	friends┋family member	family member	family member	family member	family member	family member	family member	friends	family member	family member	friends┋family member	family member	family member	friends┋family member	family member	family member	family member	family member	friends	friends	family member
384	2015/3/26 12:23:22	180seconds	223.86.182.6(四川-绵阳)	Recommender System	femaile	<=30	notComputer	none	family member	family member	none	none	none	none	none	none	none	friends	family member	family member	none	none	none	none	family member	none	none	none	none	none	family member	none	family member	friends	none	none	none
385	2015/3/26 12:23:42	146seconds	218.104.140.190(福建-厦门)	Recommender System	male	<=30	notComputer	family member	family member	none	friends┋family member	family member┋friends	none	none	friends┋family member	family member┋friends	none	friends┋family member	family member┋friends	friends┋family member	family member	family member	family member	family member	family member	family member	family member	friends┋family member┋strangers	family member	family member	family member	family member	friends┋family member	family member┋friends	family member	none	family member
386	2015/3/26 12:35:35	114seconds	218.199.3.39(湖北-武汉)	Recommender System	femaile	<=30	notComputer	friends	family member	family member	friends	strangers┋friends	friends	friends	strangers┋friends	friends	friends	friends┋family member	family member┋friends	friends┋family member	family member┋friends	friends┋family member	family member┋friends	friends┋family member	family member┋friends	friends┋family member	family member	friends	friends	family member	family member	friends	friends┋family member	family member┋friends	family member	family member	family member
387	2015/3/26 12:38:18	30seconds	59.67.0.196(天津-天津)	Recommender System	male	>30	notComputer	friends	friends	friends	friends	friends	friends	friends	friends	friends	friends	friends	friends	friends	friends	friends	friends	friends	friends	friends	friends	friends	friends	friends	friends	friends	friends	friends	friends	friends	friends
388	2015/3/26 12:40:30	185seconds	14.18.29.236(广东-广州)	WeChat	femaile	>30	notComputer	friends┋family member	family member	friends┋family member	family member	friends┋family member	none	none	friends┋family member	none	none	family member	family member	friends┋family member	family member	none	family member	family member	friends┋family member	family member	none	friends┋family member	family member	family member	family member	friends┋family member	family member┋friends	friends┋family member	none	none	none
389	2015/3/26 12:43:10	129seconds	112.132.102.111(安徽-阜阳)	Mobile Phone	male	<=30	notComputer	none	none	family member	friends┋family member	none	none	none	none	strangers	none	friends┋family member	family member┋friends	friends┋family member	family member┋friends	none	none	family member	friends┋family member	family member┋friends	none	none	friends┋family member	none	none	none	none	family member	none	none	none
390	2015/3/26 12:48:32	125seconds	123.139.17.85(陕西-西安)	Recommender System	male	<=30	notComputer	friends┋family member	family member┋friends	friends┋family member	family member┋strangers┋friends	friends	friends	none	friends	none	strangers	strangers	none	none	none	none	friends┋family member┋strangers	none	friends	friends	none	friends	none	strangers┋friends	none	none	strangers┋friends	strangers	none	none	none
391	2015/3/26 12:48:54	64seconds	110.181.246.166(山西-大同)	Mobile Phone	femaile	<=30	notComputer	none	family member	family member	family member	family member	friends┋family member	none	none	none	none	none	none	none	none	none	none	none	none	none	none	none	none	none	none	none	none	none	none	none	none
392	2015/3/26 12:52:14	87seconds	124.205.212.200(北京-北京)	Recommender System	male	<=30	notComputer	none	none	none	none	none	none	none	strangers	friends	none	none	none	none	none	none	none	none	none	none	none	none	none	none	none	none	none	none	none	none	none
393	2015/3/26 12:53:34	40seconds	113.251.173.233(重庆-重庆)	Recommender System	male	<=30	Computer	friends	strangers	strangers	strangers	strangers┋friends	friends	friends	strangers┋friends	friends	strangers	friends	strangers	friends	strangers	strangers┋friends	friends	strangers	strangers┋friends	strangers	strangers	friends	friends	friends	strangers	friends	friends	strangers	strangers	strangers	strangers
394	2015/3/26 12:57:14	60seconds	61.136.211.58(湖北-未知)	Recommender System	male	<=30	notComputer	family member	family member	family member	family member	family member	family member	none	none	none	none	none	none	none	none	none	none	none	none	none	none	none	none	none	none	none	none	none	none	none	none
395	2015/3/26 13:01:42	36seconds	124.152.240.202(甘肃-兰州)	Recommender System	male	<=30	notComputer	none	none	strangers	strangers	strangers	strangers	none	strangers	strangers	none	friends	friends	friends	none	friends	strangers	friends	friends	friends	strangers	strangers	friends	family member	strangers	friends	strangers	family member	strangers┋friends	friends	strangers
396	2015/3/26 13:05:35	148seconds	60.190.226.212(浙江-杭州)	Recommender System	male	>30	notComputer	friends┋family member	family member┋friends	friends┋family member	family member┋friends	friends┋family member	family member┋friends	none	friends┋family member	family member┋friends	friends┋family member	family member┋friends	friends┋family member	family member┋friends	family member	family member	friends┋family member	family member	family member	family member	family member	family member	friends┋family member	family member	none	family member	family member	friends┋family member	family member	none	none
397	2015/3/26 13:08:40	113seconds	159.226.216.1(北京-北京)	Recommender System	femaile	<=30	notComputer	none	none	friends┋family member	none	none	none	none	friends┋family member	none	none	none	none	none	none	none	none	none	none	none	none	none	none	none	none	none	none	none	none	none	none
398	2015/3/26 13:13:48	149seconds	10.195.159.215(未知-未知)	Mobile Phone	male	<=30	notComputer	none	none	none	none	friends	friends	none	friends	friends	none	friends┋family member	family member┋friends	none	none	none	none	family member	friends┋family member	family member	family member	friends	family member	none	none	none	friends	none	none	friends	family member
399	2015/3/26 13:26:29	144seconds	202.107.78.14(辽宁-锦州)	Mobile Phone	male	<=30	Computer	none	none	none	friends┋family member	family member┋friends	none	none	friends┋family member	none	friends	friends┋family member	family member┋friends	friends┋family member	family member┋friends	friends┋family member	family member┋friends	friends┋family member	family member┋friends	friends┋family member	family member	friends┋family member	family member┋friends	family member	family member	none	friends	friends	none	none	none
400	2015/3/26 14:24:23	89seconds	221.6.159.253(江苏-镇江)	Recommender System	femaile	<=30	notComputer	none	none	none	none	none	none	none	none	none	none	friends┋family member┋strangers	friends┋family member	family member┋friends	friends┋family member	family member┋strangers┋friends	none	friends┋family member┋strangers	friends┋family member┋strangers	none	none	friends┋family member┋strangers	friends┋family member	family member┋friends	friends┋family member	family member┋friends	friends┋family member	family member┋strangers┋friends	family member┋strangers┋friends	none	none
402	2015/3/26 14:42:11	166seconds	61.138.177.9(吉林-长春)	Recommender System	male	<=30	notComputer	friends	strangers	friends	none	friends	friends	none	friends	none	none	friends	friends	friends	friends	none	none	friends	strangers	strangers	none	strangers	friends	none	friends	none	none	strangers	none	none	none
403	2015/3/26 15:52:49	56seconds	58.246.161.121(上海-上海)	Recommender System	femaile	<=30	notComputer	family member	none	none	none	friends┋family member	none	none	friends┋family member	none	none	none	none	none	none	none	none	none	none	none	none	none	none	none	none	none	none	none	none	none	none
404	2015/3/26 15:54:51	119seconds	117.23.118.148(陕西-宝鸡)	Mobile Phone	male	<=30	notComputer	friends┋family member┋strangers	friends┋family member┋strangers	friends┋family member	family member┋strangers┋friends	family member┋friends	friends┋family member	family member┋strangers┋friends	family member┋friends	friends┋family member┋strangers	friends┋family member┋strangers	friends┋family member┋strangers	friends┋family member┋strangers	friends┋family member	family member┋strangers┋friends	family member	friends┋family member┋strangers	friends┋family member	family member┋friends	friends┋family member	none	friends┋family member	family member┋friends	friends┋family member	family member	friends┋family member	family member	friends┋family member	family member┋friends	friends┋family member	family member
405	2015/3/26 15:57:53	129seconds	218.94.124.41(江苏-南京)	Recommender System	femaile	<=30	notComputer	friends┋family member	family member┋friends	friends┋family member	family member┋friends	friends┋family member	none	none	friends┋family member	family member┋friends	family member	friends┋family member	family member┋friends	friends┋family member	family member┋friends	family member	friends┋family member	family member┋friends	friends┋family member	family member┋strangers┋friends	family member	friends┋family member	family member	friends┋family member	family member	friends┋family member	family member┋friends	friends┋family member	family member	family member	family member
406	2015/3/26 16:05:38	118seconds	111.9.35.143(四川-成都)	Recommender System	male	<=30	notComputer	friends	friends	friends	friends	friends	friends	friends	friends	friends	friends	friends	family member	friends	family member	family member	friends	friends	friends	friends	family member	friends	family member	friends	family member	friends	family member	friends	family member	family member	family member
407	2015/3/26 16:09:39	67seconds	221.2.85.19(山东-临沂)	Mobile Phone	male	<=30	notComputer	strangers	strangers	strangers	strangers	strangers	strangers	strangers	strangers	strangers	strangers	strangers	strangers	strangers	strangers	strangers	strangers	strangers	strangers	strangers	strangers	strangers	strangers	strangers	strangers	strangers	strangers	strangers	strangers	strangers	strangers
409	2015/3/26 16:36:06	83seconds	171.82.184.54(湖北-武汉)	Mobile Phone	male	<=30	notComputer	friends	family member	family member	family member	strangers	friends	family member	friends	family member	family member	friends	friends	friends	family member	family member	family member	friends	family member	family member	family member	friends	friends	none	none	none	none	friends	friends	family member	none
410	2015/3/26 16:36:17	96seconds	122.194.13.130(江苏-盐城)	Recommender System	male	<=30	notComputer	none	none	none	none	none	none	none	none	none	none	none	none	none	none	none	none	none	none	none	none	none	none	none	none	none	none	none	none	none	none
411	2015/3/26 16:37:27	116seconds	36.47.25.17(陕西-西安)	WeChat	male	<=30	notComputer	none	none	none	family member	family member	family member	none	friends	none	none	family member	family member	family member	family member	family member	family member	family member	family member	family member	none	family member	family member	family member	family member	family member	friends	friends	none	none	none
413	2015/3/26 16:38:42	69seconds	171.82.184.54(湖北-武汉)	Mobile Phone	male	<=30	Computer	strangers┋friends	friends	none	family member	friends	friends	family member	family member	friends	strangers┋friends	strangers	none	none	none	family member	family member	family member	family member	friends	none	friends┋family member	family member┋friends	family member	family member	friends┋family member	family member┋friends	friends┋family member	family member	family member	none
414	2015/3/26 16:38:59	30seconds	122.194.13.130(江苏-盐城)	Recommender System	male	<=30	Computer	family member	friends	strangers	none	strangers	friends	friends	friends	friends	friends	friends	strangers	strangers	strangers	friends	friends	strangers	strangers	strangers	strangers	friends	friends	strangers	none	strangers	strangers	strangers	strangers	friends	friends
415	2015/3/26 16:40:32	130seconds	61.158.176.146(河南-商丘)	Mobile Phone	femaile	<=30	notComputer	none	friends┋family member	none	none	friends	none	none	friends┋family member	none	none	friends┋family member	family member┋friends	friends┋family member┋strangers	friends┋family member	family member┋friends	friends┋family member┋strangers	friends┋family member┋strangers	friends┋family member┋strangers	strangers	family member	strangers	friends	friends┋family member┋strangers	friends┋family member	family member┋strangers┋friends	family member┋strangers┋friends	family member┋strangers┋friends	family member┋strangers┋friends	family member┋strangers┋friends	family member┋friends
416	2015/3/26 16:41:09	85seconds	218.29.46.39(河南-新乡)	Recommender System	male	<=30	notComputer	friends	none	none	friends	friends	family member	family member	friends	friends	friends	family member	family member	friends	family member	family member	friends	family member	friends	friends	family member	friends	friends	family member	family member	friends	friends	friends	family member	friends	family member
417	2015/3/26 17:09:02	89seconds	106.38.154.96(北京-北京)	Mobile Phone	femaile	<=30	notComputer	none	none	none	none	none	none	none	friends	none	none	none	none	none	none	none	none	none	none	none	none	none	none	none	none	none	none	none	none	none	none
418	2015/3/26 17:09:44	123seconds	210.83.228.3(广东-深圳)	Recommender System	male	>30	notComputer	friends	friends	none	none	none	none	none	none	none	friends	friends	friends	friends	none	none	none	none	friends	none	none	friends	none	none	none	none	none	none	none	none	none
419	2015/3/26 17:11:55	26seconds	222.139.6.153(河南-安阳)	Mobile Phone	male	<=30	notComputer	family member	family member	family member	family member	family member	family member	family member	family member	family member	family member	family member	family member	family member	family member	family member	family member	family member	family member	family member	family member	family member	family member	family member	family member	family member	family member	family member	family member	family member	family member
420	2015/3/26 17:14:57	45seconds	218.108.128.131(浙江-杭州)	Recommender System	male	<=30	notComputer	family member	none	none	none	none	none	none	none	none	none	none	none	none	none	none	none	none	none	none	none	none	none	none	none	none	none	none	none	none	none
421	2015/3/26 17:16:52	65seconds	114.248.163.230(北京-北京)	Recommender System	femaile	<=30	notComputer	none	none	none	none	none	none	none	none	none	none	none	none	none	none	none	none	none	none	none	none	none	none	none	none	none	none	none	none	none	none
422	2015/3/26 17:23:55	51seconds	220.185.166.77(浙江-台州)	Recommender System	male	<=30	notComputer	none	none	none	none	none	none	none	none	none	none	none	none	none	none	none	none	none	none	none	none	none	none	none	none	none	none	none	none	none	none
423	2015/3/26 17:29:39	76seconds	101.5.219.114(北京-北京)	Recommender System	male	<=30	notComputer	family member	friends	family member	family member	family member	friends	family member	friends	family member	family member	friends	friends	friends	family member	family member	friends	friends	friends	friends	family member	friends	friends	friends	family member	friends	friends	friends	friends	friends	friends
424	2015/3/26 17:32:30	86seconds	114.225.120.161(江苏-无锡)	Mobile Phone	male	<=30	notComputer	none	friends	friends	none	strangers┋friends	none	none	none	none	none	none	none	none	none	none	none	none	none	none	none	none	none	none	none	none	none	none	none	none	none
425	2015/3/26 17:34:40	139seconds	110.205.212.21(湖南-怀化)	Recommender System	male	<=30	notComputer	friends	friends	none	friends┋family member	friends	none	none	friends┋family member	none	none	friends	friends┋family member	family member┋friends	none	none	none	friends┋family member	friends	friends┋family member	none	friends┋family member	friends	friends	none	friends	none	friends	none	none	none
426	2015/3/26 17:48:28	80seconds	175.0.175.194(湖南-长沙)	Mobile Phone	male	<=30	notComputer	none	none	none	none	none	none	none	none	none	none	none	none	none	none	none	none	none	none	none	none	none	none	none	none	none	none	none	none	none	none
427	2015/3/26 18:00:33	97seconds	119.62.24.246(云南-昆明)	Mobile Phone	femaile	<=30	notComputer	friends┋family member	family member┋friends	friends┋family member	family member┋friends	friends┋family member	family member┋friends	family member	friends┋family member	family member┋friends	friends┋family member	family member┋friends	friends┋family member	family member	family member	family member	family member	family member	family member	friends	family member	family member	family member	friends	family member	friends	friends	friends	friends┋family member	family member┋friends	family member
428	2015/3/26 18:13:41	43seconds	123.149.182.33(河南-洛阳)	Recommender System	male	<=30	notComputer	family member	family member	family member	family member	family member	family member	family member	family member	family member	family member	family member	family member	family member	family member	family member	family member	family member	family member	family member	family member	family member	family member	family member	family member	family member	family member	family member	family member	family member	family member
430	2015/3/26 18:30:21	35seconds	221.181.104.200(上海-上海)	Mobile Phone	femaile	<=30	notComputer	family member	family member	family member	family member	family member	family member	family member	family member	family member	family member	family member	family member	family member	family member	family member	family member	family member	family member	family member	family member	family member	family member	family member	family member	family member	family member	family member	family member	family member	family member
431	2015/3/26 18:43:45	83seconds	223.104.20.33(河南-郑州)	Mobile Phone	femaile	<=30	notComputer	friends	friends	family member	friends	friends	friends	friends	friends	friends	friends	none	none	none	none	none	none	friends	friends	friends	family member	friends	friends	friends	friends	friends	friends	friends	friends	friends	friends
432	2015/3/26 19:03:49	98seconds	27.223.6.70(山东-青岛)	Recommender System	male	<=30	notComputer	friends	friends	strangers┋friends	family member┋friends	strangers┋family member	friends	friends	none	none	none	none	none	friends┋family member	none	none	none	none	friends	friends	none	none	none	none	none	none	none	friends	none	none	none
433	2015/3/26 19:12:35	110seconds	58.23.8.146(福建-厦门)	Recommender System	femaile	>30	notComputer	family member	friends┋family member	family member┋friends	friends┋family member	family member┋friends	friends┋family member	family member┋friends	friends┋family member	family member┋friends	friends┋family member	family member┋friends	friends┋family member	family member┋friends	friends┋family member	family member┋friends	friends┋family member	family member┋friends	friends┋family member	family member┋friends	friends┋family member	family member┋friends	friends┋family member	family member┋friends	friends┋family member	family member┋friends	friends┋family member	family member┋friends	friends┋family member	family member┋friends	friends┋family member
434	2015/3/26 19:13:38	43seconds	124.15.141.113(福建-厦门)	Recommender System	male	<=30	notComputer	none	none	none	none	none	none	none	none	none	none	none	none	none	none	none	none	none	none	none	none	none	none	none	none	none	none	none	none	none	none
435	2015/3/26 19:31:45	94seconds	218.4.228.230(江苏-苏州)	Recommender System	male	<=30	notComputer	friends	friends	none	none	none	none	none	none	none	none	friends	friends	none	none	none	none	none	none	none	none	none	none	none	none	none	none	none	none	none	none
436	2015/3/26 19:33:42	120seconds	183.184.227.32(山西-太原)	Recommender System	male	<=30	Computer	friends	friends	friends	friends	friends	friends	family member	friends┋family member┋strangers	strangers┋friends	friends┋strangers	friends┋family member┋strangers	friends	friends	strangers┋friends	family member	strangers┋friends	friends	strangers	friends	none	friends	family member	friends	strangers	friends	friends	friends┋family member┋strangers	friends	friends┋family member	family member
437	2015/3/26 19:37:19	153seconds	39.71.45.63(山东-济南)	Recommender System	male	>30	notComputer	none	none	family member	family member	family member	family member	family member	family member	none	family member	family member	family member	family member	friends	none	family member	friends	friends	friends	none	family member	family member	family member	none	family member	family member	family member	family member	none	none
438	2015/3/26 19:38:39	59seconds	180.95.224.249(甘肃-兰州)	Recommender System	male	>30	Computer	none	none	family member	family member	family member	family member	family member	family member	family member	none	none	none	none	none	none	none	none	none	none	none	none	none	none	none	none	none	none	none	none	none
439	2015/3/26 19:44:45	145seconds	117.136.9.140(山东-济南)	Mobile Phone	femaile	<=30	notComputer	friends┋family member	friends	friends┋family member	none	none	friends┋family member	family member┋friends	family member	none	none	friends┋family member	family member┋friends	friends┋family member	family member┋friends	friends┋family member	family member┋friends	friends┋family member	family member┋strangers┋friends	family member┋strangers┋friends	none	family member	family member	family member	family member	friends┋family member┋strangers	family member	family member	family member	family member	none
440	2015/3/26 19:44:48	62seconds	120.201.41.8(辽宁-抚顺)	Mobile Phone	femaile	<=30	notComputer	family member	family member	friends	friends	friends	none	none	friends┋family member┋strangers	friends┋family member┋strangers	friends┋family member┋strangers	friends┋family member┋strangers	family member	family member	family member	family member	friends┋family member	family member	friends┋family member	family member┋friends	family member	friends┋family member	family member┋friends	friends┋family member	family member	family member	family member	family member	family member	family member	family member
441	2015/3/26 19:59:33	56seconds	49.77.231.80(江苏-南京)	Recommender System	male	<=30	Computer	family member	family member	family member	family member	family member	family member	family member	friends	friends	friends	friends	friends	friends	friends	family member	friends	friends	friends	friends┋family member	friends	friends	friends	friends	friends	friends	friends	friends	friends	friends	friends
442	2015/3/26 20:38:50	87seconds	223.104.4.33(江苏-南京)	Mobile Phone	femaile	<=30	notComputer	friends┋family member	friends	none	none	none	none	none	friends┋family member	none	none	friends	friends	friends	friends	none	friends	none	none	none	none	none	none	none	none	none	none	none	none	none	none
443	2015/3/26 20:44:09	189seconds	219.150.53.86(天津-天津)	Recommender System	male	<=30	notComputer	family member	friends┋family member	none	friends	friends┋family member	none	none	friends┋family member┋strangers	none	family member	friends┋family member┋strangers	family member	none	friends┋family member	family member	family member	friends┋family member	family member┋strangers┋friends	family member	family member	friends┋family member┋strangers	friends┋family member	none	family member	family member	friends	friends	none	none	family member
444	2015/3/26 20:46:53	50seconds	124.16.171.239(北京-北京)	Recommender System	male	<=30	notComputer	none	none	none	none	none	none	none	none	none	none	none	none	none	none	none	none	none	none	none	none	none	none	none	none	none	none	none	none	none	none
446	2015/3/26 20:51:30	86seconds	60.190.58.162(浙江-宁波)	CrowdSourcing	femaile	<=30	Computer	friends	friends	friends	none	none	none	none	none	none	none	none	friends	none	none	none	none	none	none	none	none	none	none	none	none	none	none	none	none	none	none
447	2015/3/26 20:54:03	43seconds	222.190.117.216(江苏-南京)	Poster Link	male	<=30	notComputer	none	none	none	none	none	none	none	none	none	friends	friends	friends	family member	family member	family member	family member	family member	family member	family member	family member	family member	family member	family member	family member	family member	family member	family member	family member	family member	family member
448	2015/3/26 20:54:53	243seconds	124.235.202.208(吉林-长春)	Mobile Phone	femaile	<=30	notComputer	none	none	friends	friends┋family member	family member┋friends	friends	none	friends┋family member	family member┋strangers┋friends	friends	friends┋family member┋strangers	friends┋family member	family member	friends┋family member	family member┋friends	friends┋family member	family member┋friends	friends┋family member┋strangers	friends┋family member	family member	none	none	none	none	none	none	none	none	none	none
449	2015/3/26 20:56:02	295seconds	183.62.57.174(广东-广州)	Recommender System	femaile	<=30	notComputer	none	friends	none	friends	friends	none	none	friends	none	none	friends	friends	none	none	none	none	friends	friends	friends	none	friends	none	none	none	none	none	none	none	none	none
450	2015/3/26 20:58:21	119seconds	117.136.0.170(北京-北京)	Mobile Phone	femaile	<=30	notComputer	friends┋family member	family member┋friends	friends┋family member	family member┋friends	friends┋family member	family member┋friends	friends┋family member	family member┋friends	friends┋family member	family member┋friends	friends┋family member	family member┋friends	friends┋family member	family member┋friends	family member	friends┋family member	family member┋friends	friends┋family member	family member┋friends	family member	friends┋family member	family member┋friends	friends┋family member	family member┋friends	friends┋family member	family member┋friends	friends┋family member	family member┋friends	friends┋family member	family member
451	2015/3/26 20:58:53	110seconds	125.41.237.139(河南-郑州)	Mobile Phone	femaile	<=30	notComputer	none	family member	none	friends┋family member	family member┋friends	family member	family member	friends┋family member	family member┋friends	family member	friends┋family member	family member┋friends	family member	family member	family member	family member	friends┋family member	family member┋friends	friends┋family member	family member	friends┋family member	family member	family member	family member	family member	family member	family member	family member	none	none
452	2015/3/26 21:04:10	159seconds	211.162.81.95(江苏-南京)	Mobile Phone	male	<=30	notComputer	family member	family member	family member	family member	family member	none	none	family member	family member	none	friends	friends	friends	family member	family member	friends	family member	friends	friends	none	friends	friends	family member	family member	family member	family member	family member	family member	none	none
453	2015/3/26 21:11:37	121seconds	159.226.238.154(北京-北京)	Recommender System	femaile	<=30	notComputer	none	family member	none	none	none	friends	none	friends	none	none	none	none	none	none	none	none	family member	family member	family member	none	none	family member	family member	family member	none	none	none	none	none	none
454	2015/3/26 21:13:37	133seconds	111.127.86.122(内蒙古-包头)	Recommender System	femaile	<=30	notComputer	none	family member	family member	strangers	none	none	none	strangers	none	strangers	friends	family member	friends┋family member	family member┋friends	friends┋family member	family member┋friends	none	friends┋family member	strangers	none	strangers	family member	none	family member	friends	friends┋family member	family member┋friends	none	none	none
455	2015/3/26 21:15:43	79seconds	221.212.176.51(黑龙江-哈尔滨)	Recommender System	male	<=30	notComputer	family member	family member	friends┋family member	none	none	none	family member	friends┋family member	none	family member	family member	family member	family member	family member	none	none	friends┋family member	family member┋friends	family member	none	none	family member	family member	family member	none	family member	none	none	none	none
457	2015/3/26 21:21:57	41seconds	59.72.112.116(吉林-长春)	Recommender System	femaile	<=30	notComputer	none	none	none	none	none	none	none	none	none	none	none	none	none	none	none	none	none	none	none	none	none	none	none	none	none	none	none	none	none	none
458	2015/3/26 21:23:41	46seconds	112.4.139.114(江苏-南京)	Recommender System	male	<=30	notComputer	none	none	none	none	none	none	none	friends┋family member	none	none	none	none	none	none	none	none	none	none	none	none	none	none	none	none	none	none	none	none	none	none
459	2015/3/26 21:26:24	47seconds	111.197.84.198(北京-北京)	Mobile Phone	male	<=30	notComputer	none	none	none	none	none	none	none	none	none	none	none	none	none	none	none	none	none	none	none	none	none	none	none	none	none	none	none	none	none	none
460	2015/3/26 21:26:25	102seconds	140.207.29.68(上海-上海)	Recommender System	male	<=30	notComputer	friends┋family member┋strangers	friends┋family member┋strangers	friends┋family member┋strangers	family member	family member	friends	family member	friends	strangers	friends	family member	friends	strangers┋family member	friends	strangers┋family member	friends	strangers┋family member	friends	friends	strangers┋family member	friends	strangers┋family member	friends	strangers┋family member	friends	strangers	friends	strangers	friends	family member
461	2015/3/26 21:28:47	150seconds	58.19.2.127(湖北-武汉)	Mobile Phone	femaile	<=30	notComputer	friends┋family member	family member┋friends	none	friends┋family member	family member┋friends	none	none	friends┋family member┋strangers	friends┋family member┋strangers	friends┋family member┋strangers	friends┋family member┋strangers	friends┋family member	family member┋friends	friends┋family member	family member	friends┋family member┋strangers	friends┋family member	family member┋friends	friends┋family member	none	friends┋family member	family member┋friends	friends┋family member	family member	friends┋family member	family member┋friends	friends┋family member	none	none	none
462	2015/3/26 21:38:20	33seconds	27.201.254.250(山东-济南)	Recommender System	male	<=30	notComputer	friends	strangers	strangers	friends	friends	strangers	strangers	strangers	strangers	family member	family member	friends	friends	strangers	strangers	friends	strangers	strangers	none	family member	friends	family member	strangers	strangers	strangers	strangers┋friends	friends	friends	friends	strangers┋family member
463	2015/3/26 21:48:50	69seconds	223.11.22.128(山西-太原)	Mobile Phone	male	<=30	notComputer	family member	friends	friends	friends	friends	friends	friends	family member	family member	friends	strangers	strangers	strangers	friends	friends	friends	friends	friends	family member	friends	friends	friends	strangers	friends	friends	friends	friends	strangers	none	strangers
464	2015/3/26 21:54:06	78seconds	111.37.5.124(山东-临沂)	Mobile Phone	male	<=30	notComputer	strangers	strangers	strangers	strangers	strangers	strangers	strangers	strangers	strangers	strangers	strangers	strangers	strangers	strangers	strangers	strangers	strangers	strangers	strangers	strangers	strangers	strangers	strangers	strangers	strangers	strangers	strangers	strangers	strangers	strangers
465	2015/3/26 21:57:03	58seconds	218.197.119.103(湖北-武汉)	Mobile Phone	femaile	<=30	notComputer	none	none	none	none	none	none	none	none	none	none	none	none	none	none	none	none	none	none	none	none	none	none	none	none	none	none	none	none	none	none
466	2015/3/26 22:00:41	66seconds	111.202.57.234(北京-北京)	Mobile Phone	male	>30	notComputer	friends	friends	friends	friends	friends	friends	friends	friends	friends	friends	friends	friends	friends	friends	friends	friends	friends	friends	friends	friends	friends	friends	friends	friends	friends	friends	friends	friends	friends	friends
467	2015/3/26 22:01:23	152seconds	61.183.192.4(湖北-武汉)	Recommender System	male	<=30	notComputer	friends┋family member	family member┋friends	none	friends┋family member	family member┋friends	friends┋family member	none	friends┋family member	family member┋friends	friends┋family member	family member┋strangers┋friends	family member┋friends	friends┋family member	family member┋friends	friends┋family member	family member┋friends	friends┋family member	family member┋friends	friends┋family member	family member	friends┋family member	family member┋friends	friends┋family member	family member┋friends	friends	friends	friends┋family member	family member┋friends	none	none
468	2015/3/26 22:03:09	89seconds	123.139.16.170(陕西-西安)	Recommender System	femaile	>30	notComputer	none	friends	friends	none	none	none	none	friends	none	friends	friends	friends	friends	friends	none	none	friends	friends	friends	none	friends	none	none	none	none	friends	friends	none	none	none
470	2015/3/26 22:04:54	94seconds	124.205.212.183(北京-北京)	Mobile Phone	male	<=30	notComputer	friends┋family member	family member┋friends	friends┋family member	family member┋friends	friends┋family member	none	none	none	none	none	none	none	none	none	none	friends┋family member┋strangers	friends┋family member┋strangers	friends┋family member┋strangers	friends┋family member┋strangers	none	family member	family member	family member	family member	family member	family member	family member	family member	family member	family member
472	2015/3/26 22:13:45	189seconds	180.201.4.163(山东-济南)	Recommender System	male	<=30	notComputer	friends┋family member	family member┋strangers┋friends	none	friends┋family member	none	none	family member	friends┋family member┋strangers	friends┋family member	family member┋friends	family member	family member	family member	friends┋family member	family member	family member	friends┋family member	family member┋strangers┋friends	family member	family member	friends┋family member	family member┋friends	family member	family member	family member	family member	family member	none	none	family member
473	2015/3/26 22:27:53	80seconds	218.2.100.81(江苏-南京)	Recommender System	male	>30	notComputer	friends┋family member	family member┋friends	friends┋family member	none	none	none	none	friends┋family member┋strangers	none	none	friends┋family member	family member┋strangers┋friends	family member┋strangers┋friends	family member┋strangers┋friends	none	none	none	friends┋family member┋strangers	friends┋family member	none	friends┋family member┋strangers	friends┋family member	none	none	none	friends┋family member	friends┋strangers	strangers┋friends	none	none
474	2015/3/26 22:29:10	145seconds	61.180.205.129(黑龙江-齐齐哈尔)	Mobile Phone	male	<=30	notComputer	friends┋family member	family member┋friends	none	friends┋family member┋strangers	friends┋family member	none	friends┋family member	family member┋strangers┋friends	family member┋friends	friends┋family member	family member┋strangers┋friends	family member┋strangers┋friends	family member┋friends	friends┋family member	family member┋friends	friends┋family member	family member┋friends	friends┋family member	family member┋friends	friends┋family member	none	none	friends┋family member	family member┋friends	friends┋family member	family member┋friends	friends┋family member	none	none	friends┋family member
475	2015/3/26 22:39:37	129seconds	122.88.17.45(江苏-南京)	Recommender System	femaile	>30	notComputer	none	none	none	none	none	none	none	none	none	none	none	none	none	none	none	none	none	none	none	family member	none	none	family member	family member	friends┋family member	family member┋friends	none	none	none	family member
476	2015/3/26 22:42:55	93seconds	223.96.224.131(山东-菏泽)	Mobile Phone	femaile	<=30	notComputer	family member	family member	family member	strangers	none	none	family member	family member	none	none	family member	family member	family member	family member	family member	family member	family member	family member	family member	family member	family member	family member	family member	family member	none	family member	family member	family member	family member	none
477	2015/3/26 22:47:51	50seconds	180.110.104.67(江苏-南京)	Mobile Phone	male	<=30	notComputer	strangers	friends	friends	strangers	friends	friends	strangers	friends	friends	strangers┋friends	family member	friends	strangers	friends	family member	friends	strangers	strangers	friends	friends	strangers	friends	friends	strangers	strangers	friends	strangers	friends	strangers	friends
478	2015/3/26 22:52:05	108seconds	111.4.18.71(湖北-武汉)	Mobile Phone	femaile	<=30	notComputer	family member	none	none	none	none	none	none	family member	none	none	friends┋family member	family member┋strangers┋friends	none	friends┋family member	family member┋friends	friends┋family member┋strangers	friends┋family member┋strangers	friends┋family member	family member┋friends	friends┋family member	family member┋friends	friends┋family member	family member┋friends	friends┋family member	family member┋friends	friends┋family member	family member┋friends	none	none	none
479	2015/3/26 23:12:57	148seconds	218.201.105.220(山东-潍坊)	Mobile Phone	femaile	<=30	notComputer	friends┋family member	none	none	none	friends┋family member┋strangers	none	none	friends┋family member	none	none	friends┋family member┋strangers	friends┋family member	family member┋friends	friends┋family member	family member	family member	family member	friends	friends	family member	friends	friends	friends	friends	friends	friends	friends	family member	family member	family member
480	2015/3/26 23:25:28	49seconds	128.104.69.177(未知-未知)	Recommender System	male	<=30	notComputer	friends	friends	friends	friends	friends	friends	friends	friends	friends	none	none	none	friends	friends	none	none	none	none	none	none	none	none	none	none	none	none	none	none	none	none
482	2015/3/26 23:58:22	108seconds	222.78.86.149(福建-龙岩)	Mobile Phone	male	<=30	notComputer	family member	family member	friends┋family member	friends	friends	none	none	none	none	none	strangers	none	none	none	none	friends┋family member	family member┋friends	friends┋family member	family member┋friends	none	friends┋family member	family member┋friends	friends┋family member	family member┋friends	family member	friends┋family member	friends	friends	none	none
483	2015/3/27 0:05:42	51seconds	117.136.45.119(江苏-南京)	Mobile Phone	femaile	<=30	notComputer	none	none	none	none	none	none	none	none	none	none	none	none	none	none	none	none	none	none	none	none	none	none	none	none	none	none	none	none	none	none
484	2015/3/27 0:08:48	123seconds	111.37.12.76(山东-济南)	Mobile Phone	femaile	<=30	notComputer	friends	friends	none	none	none	none	strangers	friends	friends	none	family member	family member	family member	family member	none	strangers	family member	family member	family member	family member	family member	family member	family member	family member	strangers	strangers	friends	friends	strangers	strangers
485	2015/3/27 0:14:26	141seconds	218.201.115.244(山东-潍坊)	Mobile Phone	male	<=30	notComputer	friends┋family member	family member┋friends	friends	friends	friends	none	none	friends┋family member	friends	none	friends┋family member	family member┋friends	friends┋family member	family member┋friends	friends┋family member	friends	friends┋family member	family member┋friends	friends┋family member	family member	friends┋family member	family member┋friends	friends┋family member	none	friends┋family member	family member┋friends	friends┋family member	none	none	none
486	2015/3/27 0:22:53	118seconds	139.205.39.123(四川-成都)	Mobile Phone	male	<=30	notComputer	friends┋family member	family member┋friends	friends┋family member	family member┋friends	friends	friends┋family member┋strangers	friends┋family member┋strangers	friends┋family member┋strangers	friends┋family member┋strangers	friends┋family member┋strangers	friends┋family member┋strangers	friends┋family member	family member┋friends	friends┋family member	family member	friends┋family member┋strangers	friends┋family member┋strangers	friends┋family member┋strangers	friends┋family member┋strangers	family member	friends┋family member┋strangers	friends┋family member	family member┋strangers┋friends	family member	friends┋family member	family member┋strangers┋friends	family member┋strangers┋friends	family member	none	family member
487	2015/3/27 0:43:35	241seconds	123.247.218.214(辽宁-沈阳)	Mobile Phone	male	<=30	notComputer	family member	friends┋family member┋strangers	none	friends┋family member	family member┋friends	none	none	none	none	none	family member	family member	family member	friends┋family member	family member┋friends	none	friends┋family member	family member┋strangers┋friends	family member	family member	friends┋family member┋strangers	family member	family member	family member	family member	friends┋family member	family member┋strangers┋friends	family member	none	none
489	2015/3/27 1:25:25	171seconds	162.221.124.7(未知-未知)	Recommender System	male	<=30	notComputer	family member	friends┋family member┋strangers	family member	family member	family member	family member	family member	family member	family member	friends┋family member┋strangers	friends┋family member┋strangers	family member	family member	family member	family member	friends┋family member	family member┋friends	friends┋family member	family member┋strangers┋friends	family member	friends┋family member┋strangers	friends┋family member	family member	family member	family member	family member	friends┋family member	family member	friends┋family member	family member
490	2015/3/27 1:26:14	108seconds	182.242.225.37(云南-昆明)	Recommender System	male	<=30	notComputer	none	family member	family member	friends	friends	none	none	friends	none	none	friends	family member	family member	family member	none	none	family member	family member	none	none	family member	family member	none	none	none	none	friends	none	none	none
491	2015/3/27 1:39:00	95seconds	175.0.169.158(湖南-长沙)	Poster Link	male	<=30	notComputer	none	none	family member	family member	friends┋family member	family member	friends┋family member	family member┋strangers┋friends	family member┋friends	friends┋family member	family member┋strangers┋friends	family member┋friends	friends┋family member	family member┋friends	family member	friends┋family member	family member┋friends	friends┋family member	family member┋friends	family member	friends┋family member	family member┋friends	family member	family member	family member	friends┋family member	family member┋friends	family member	family member	family member
492	2015/3/27 5:58:09	237seconds	139.226.130.87(上海-上海)	Mobile Phone	male	<=30	notComputer	friends┋family member	family member┋strangers┋friends	family member┋friends	friends┋family member┋strangers	friends	none	none	friends┋family member	friends	none	none	friends┋family member	friends	none	friends┋family member	none	strangers┋family member	family member┋strangers┋friends	none	none	none	none	none	none	friends┋family member	family member┋strangers┋friends	family member┋friends	none	friends┋family member	none
493	2015/3/27 6:09:59	180seconds	211.161.249.83(上海-上海)	WeChat	femaile	<=30	notComputer	friends┋family member	family member┋friends	friends┋family member	family member┋friends	friends┋family member	family member┋friends	none	friends┋family member	family member┋friends	friends┋family member	family member┋friends	friends┋family member	family member┋friends	family member	family member	friends┋family member	family member┋friends	friends┋family member	family member┋friends	family member	friends┋family member	family member┋friends	friends┋family member	family member	friends┋family member	friends	friends	family member	none	none
494	2015/3/27 6:30:02	63seconds	113.229.61.141(辽宁-葫芦岛)	Recommender System	femaile	<=30	Computer	family member	friends	family member	friends	family member	friends	family member	family member	family member	family member	family member	family member	family member	family member	family member	family member	family member	family member	family member	family member	family member	family member	family member	family member	friends┋family member	family member┋friends	friends	family member	family member	friends
495	2015/3/27 6:43:15	148seconds	123.171.233.151(山东-济南)	Mobile Phone	male	>30	notComputer	family member	family member	none	none	none	none	none	friends┋family member┋strangers	none	none	friends┋family member┋strangers	friends┋family member	family member	friends┋family member	none	none	friends┋family member	family member┋strangers┋friends	family member┋strangers┋friends	none	friends┋family member	family member	family member	none	family member	family member	friends┋family member	none	none	none
496	2015/3/27 7:04:38	140seconds	220.249.74.77(湖北-武汉)	Recommender System	femaile	>30	notComputer	family member	family member	family member	family member	family member	family member	family member	family member	none	none	friends┋family member	family member┋friends	friends┋family member	family member┋friends	friends┋family member┋strangers	family member	friends┋family member	family member┋strangers┋friends	family member┋friends	family member	friends┋family member┋strangers	family member	family member	family member	friends┋family member	family member┋friends	friends┋family member	family member	none	family member
498	2015/3/27 7:21:26	41seconds	123.129.50.171(山东-东营)	Mobile Phone	femaile	<=30	notComputer	friends	strangers	strangers	friends	none	strangers	family member	family member	friends	friends	friends	friends	friends	friends	strangers	strangers	strangers	strangers	friends	friends	friends	friends	friends	strangers┋friends	strangers	strangers	strangers	strangers	strangers	strangers
499	2015/3/27 7:50:05	65seconds	58.20.114.7(湖南-长沙)	Mobile Phone	male	<=30	notComputer	friends┋family member	family member┋friends	friends┋family member	family member┋friends	friends┋family member	family member┋friends	friends┋family member	family member┋strangers┋friends	family member┋friends	friends┋family member	family member┋strangers┋friends	family member┋friends	friends┋family member	family member┋friends	friends┋family member	family member┋strangers┋friends	family member┋strangers┋friends	family member┋strangers┋friends	family member┋friends	friends┋family member	family member┋friends	friends┋family member	family member┋friends	friends┋family member	family member┋friends	friends┋family member	family member┋friends	family member	family member	family member
500	2015/3/27 7:54:46	42seconds	222.161.50.182(吉林-长春)	Recommender System	femaile	<=30	notComputer	friends┋family member	family member┋friends	none	none	none	none	none	none	none	none	none	none	friends┋family member	none	none	none	none	none	none	none	none	none	none	none	none	none	none	none	none	none
501	2015/3/27 7:56:07	115seconds	117.136.9.218(山东-济南)	Mobile Phone	femaile	<=30	Computer	none	none	none	none	none	none	none	none	none	none	friends┋family member	family member┋friends	friends┋family member	family member	none	none	none	friends┋family member	family member	none	none	none	none	none	none	none	none	none	none	none
502	2015/3/27 8:01:07	29seconds	123.129.50.171(山东-东营)	Mobile Phone	femaile	<=30	notComputer	friends	friends	friends	friends	friends	friends	friends	friends	friends	strangers	strangers	strangers	strangers	strangers	strangers	strangers	strangers	strangers	strangers	strangers	strangers	strangers	strangers	strangers	strangers	strangers	strangers	strangers	strangers	strangers
503	2015/3/27 8:03:50	64seconds	221.207.235.34(黑龙江-哈尔滨)	Recommender System	male	<=30	notComputer	friends┋family member	family member┋friends	none	none	friends┋family member	none	none	none	none	none	none	none	none	none	none	none	none	none	none	none	none	none	none	none	none	none	none	none	none	none
504	2015/3/27 8:05:42	123seconds	112.65.223.16(上海-上海)	Recommender System	male	<=30	notComputer	family member	family member	none	none	friends┋family member	none	none	friends┋family member┋strangers	friends┋family member┋strangers	none	none	family member	family member	none	none	none	friends┋family member	family member┋strangers┋friends	none	none	friends┋family member┋strangers	friends┋family member┋strangers	none	none	none	none	none	none	none	none
505	2015/3/27 8:11:29	121seconds	111.4.183.215(湖北-武汉)	Mobile Phone	male	<=30	notComputer	none	friends	family member	family member	family member	friends	friends	friends	friends	friends	friends	friends	friends	friends	friends	friends┋family member	family member	friends┋family member	family member┋friends	family member	strangers┋family member	strangers	strangers┋friends	strangers	strangers	strangers┋friends	family member┋strangers	friends┋family member	friends	friends┋family member
506	2015/3/27 8:16:12	164seconds	117.136.36.201(江苏-南京)	Mobile Phone	femaile	<=30	notComputer	none	friends┋family member	none	friends┋family member	family member┋friends	none	none	friends┋family member	none	friends┋family member	family member┋friends	friends┋family member	family member┋friends	friends┋family member	family member	friends┋family member	family member┋friends	friends┋family member	family member┋friends	family member	friends┋family member	family member┋friends	family member	family member	friends┋family member	family member┋friends	friends┋family member	friends	none	family member
507	2015/3/27 8:16:16	143seconds	219.238.229.201(北京-北京)	Recommender System	male	<=30	notComputer	friends┋family member	family member┋friends	friends┋family member	family member┋friends	friends┋family member	none	none	friends┋family member┋strangers	none	friends┋family member	family member┋friends	friends┋family member	family member┋friends	friends┋family member	none	none	friends┋family member┋strangers	friends┋family member	family member┋strangers┋friends	none	none	none	none	none	friends┋family member	family member┋friends	friends┋family member┋strangers	friends┋family member	none	none
508	2015/3/27 8:16:24	134seconds	58.58.52.51(山东-济宁)	Recommender System	male	<=30	notComputer	friends	friends	family member	friends	friends	family member	family member	friends	friends	friends	friends	friends	friends	friends	family member	friends	family member	friends	family member	family member	friends	family member	friends	family member	family member	friends	friends	family member	family member	family member
509	2015/3/27 8:19:07	64seconds	61.142.9.102(广东-东莞)	Recommender System	male	<=30	Computer	family member	friends┋family member	family member┋friends	friends┋family member	family member┋friends	family member	family member	friends┋family member	family member┋friends	family member	family member	friends┋family member	friends	friends┋family member	family member┋friends	friends┋family member	family member	family member	family member	family member	family member	family member	family member	friends	friends	family member	family member	family member	family member	family member
510	2015/3/27 8:19:52	85seconds	27.17.29.164(湖北-武汉)	Recommender System	male	<=30	notComputer	family member	family member	family member	friends	friends	friends	none	friends	friends	none	none	none	none	none	none	none	none	none	none	none	family member	family member	family member	none	none	family member	family member	friends	none	none
511	2015/3/27 8:27:15	199seconds	222.223.200.141(河北-石家庄)	Recommender System	male	>30	notComputer	friends┋family member	family member┋friends	family member	family member	family member	family member	family member	friends┋family member	family member┋friends	family member	family member	family member	friends┋family member	family member┋friends	family member	family member	family member	family member	family member	family member	family member	family member	family member	family member	family member	family member	family member	family member	family member	family member
513	2015/3/27 8:28:36	149seconds	220.163.11.181(云南-昆明)	Recommender System	male	<=30	notComputer	friends┋family member	family member┋friends	family member	family member	friends┋family member	family member┋friends	none	friends┋family member	family member┋friends	friends┋family member	family member┋friends	friends┋family member	family member┋friends	friends┋family member	family member	friends┋family member	family member┋friends	friends┋family member	family member┋friends	friends┋family member	family member┋friends	friends┋family member	family member┋friends	friends┋family member	family member┋friends	friends┋family member	family member┋friends	none	none	none
515	2015/3/27 8:42:11	114seconds	140.243.35.220(福建-福州)	WeChat	male	<=30	notComputer	friends┋family member┋strangers	friends┋family member┋strangers	family member	none	none	none	none	friends┋family member	none	none	friends┋family member┋strangers	friends┋family member	family member┋friends	friends┋family member	family member┋friends	friends┋family member	family member┋strangers┋friends	family member┋strangers┋friends	family member┋strangers┋friends	family member┋friends	friends┋family member	none	none	none	none	none	none	none	none	none
516	2015/3/27 8:43:19	149seconds	210.77.76.186(甘肃-兰州)	Recommender System	male	>30	notComputer	family member	friends┋family member	family member	family member	family member	none	none	friends┋family member	family member┋friends	none	family member	family member	family member	family member	family member	friends┋family member	family member	friends┋family member	none	none	friends┋family member┋strangers	family member	family member	none	family member	family member	family member	family member	none	none
517	2015/3/27 8:45:52	150seconds	117.114.145.2(北京-北京)	Mobile Phone	male	<=30	notComputer	none	none	none	friends┋family member	family member┋friends	friends┋family member	none	friends┋family member	none	friends┋family member	family member┋friends	friends┋family member	family member┋friends	friends┋family member	family member┋friends	friends	friends┋family member	family member┋friends	friends┋family member	family member	friends┋family member	family member┋friends	friends┋family member	family member┋friends	friends┋family member	family member┋friends	friends┋family member	none	none	none
518	2015/3/27 8:47:10	70seconds	113.200.77.9(陕西-西安)	Mobile Phone	femaile	<=30	notComputer	none	none	none	none	none	none	none	none	none	none	none	friends┋family member┋strangers	none	none	none	none	none	none	none	none	none	none	none	none	none	none	family member	none	none	none
519	2015/3/27 8:58:09	124seconds	210.77.75.168(甘肃-兰州)	Recommender System	femaile	<=30	notComputer	none	friends	none	none	none	none	none	none	none	none	friends	friends	friends	friends	none	friends	friends	friends	friends	none	none	friends	none	friends	friends	family member	none	none	none	none
520	2015/3/27 9:10:21	88seconds	166.111.114.69(北京-北京)	Recommender System	femaile	>30	notComputer	friends	family member	friends┋family member	family member	family member	friends	family member	family member	family member	family member	family member	friends	family member	friends	friends	friends	friends	friends	friends	friends┋family member	friends	family member	family member	friends	family member	friends┋family member	friends	family member	friends	family member
521	2015/3/27 9:26:18	134seconds	221.215.218.87(山东-青岛)	Recommender System	male	>30	notComputer	none	none	none	none	none	none	family member	friends	none	none	friends	friends	friends	friends	family member	family member	friends┋family member	family member┋friends	family member	family member	family member	friends┋family member	none	family member	family member	family member	none	none	none	family member
522	2015/3/27 9:33:41	50seconds	60.247.46.150(北京-北京)	WeChat	male	<=30	notComputer	friends	friends	family member	family member	friends	family member	friends	family member	family member	friends	friends	friends┋family member	friends	friends┋family member	friends	friends	friends	friends	family member	family member	family member	friends	strangers	strangers	friends	strangers	friends	friends	strangers	friends
523	2015/3/27 9:41:58	120seconds	111.37.3.30(山东-烟台)	Mobile Phone	male	<=30	notComputer	none	friends	none	family member	friends	none	none	family member	friends	friends	friends	friends	friends	friends┋family member	family member┋friends	friends	friends	strangers	friends	none	friends	friends	friends	friends	friends	friends	friends	friends	friends	friends
524	2015/3/27 9:49:56	31seconds	60.7.248.93(河北-秦皇岛)	Recommender System	male	<=30	notComputer	friends	friends	friends	friends	friends	friends	friends	friends	friends	family member	family member	family member	family member	family member	family member	family member	family member	family member	family member	family member	family member	family member	family member	family member	family member	family member	family member	family member	family member	family member
525	2015/3/27 9:58:09	56seconds	106.120.213.14(北京-北京)	Recommender System	male	<=30	notComputer	friends	friends	family member	friends	friends	friends	friends	friends	friends	friends	friends	friends	friends	friends	friends	friends	friends	family member	friends	family member	friends	friends	friends	friends┋family member	family member┋friends	friends┋family member	family member┋friends	friends┋family member	family member┋friends	friends┋family member
527	2015/3/27 10:02:16	131seconds	58.251.166.8(广东-深圳)	Recommender System	male	<=30	Computer	none	none	none	friends	friends┋family member	none	none	friends┋family member┋strangers	friends	none	friends┋family member┋strangers	friends┋family member	family member┋friends	friends┋family member	family member┋friends	family member	friends┋family member	family member┋friends	friends┋family member	none	family member	friends┋family member	family member┋friends	family member	none	friends	friends	none	none	none
528	2015/3/27 10:06:59	125seconds	222.220.210.222(云南-玉溪)	Recommender System	male	<=30	notComputer	friends┋family member	family member┋strangers┋friends	family member┋friends	friends┋family member┋strangers	friends┋family member	family member┋friends	friends┋family member	family member┋strangers┋friends	family member┋friends	friends┋family member	family member┋friends	friends┋family member	family member┋friends	friends┋family member	family member┋friends	friends┋family member	family member┋friends	friends┋family member	family member┋strangers┋friends	family member┋friends	friends┋family member	family member┋friends	friends┋family member	family member┋friends	friends┋family member┋strangers	friends┋family member┋strangers	friends┋family member┋strangers	friends┋family member	family member┋friends	friends┋family member
529	2015/3/27 10:09:19	103seconds	222.85.110.51(河南-郑州)	Recommender System	male	<=30	notComputer	friends┋family member	family member	family member	friends┋family member┋strangers	friends┋family member	none	none	friends┋family member┋strangers	none	none	friends┋family member	family member┋friends	friends┋family member	family member┋friends	none	none	none	friends┋family member┋strangers	none	none	none	none	none	none	none	none	friends┋family member	none	none	none
530	2015/3/27 10:14:43	65seconds	202.107.78.247(辽宁-锦州)	Recommender System	male	<=30	notComputer	friends┋family member	family member┋friends	friends	friends	friends	friends	friends	friends	friends	family member	family member	family member	friends	friends	friends	friends	friends	friends┋family member	family member┋friends	friends┋family member	family member┋friends	friends	friends	friends	friends	friends	friends	friends	friends	friends
531	2015/3/27 10:15:09	160seconds	218.104.69.114(安徽-合肥)	Recommender System	male	>30	notComputer	friends┋family member	family member┋friends	friends┋family member	family member┋friends	friends┋family member	family member┋friends	family member	friends┋family member┋strangers	friends┋family member	family member┋friends	friends┋family member	family member┋friends	friends┋family member	family member	friends┋family member	family member┋friends	friends┋family member	family member┋friends	friends┋family member	family member	friends┋family member	family member┋friends	friends┋family member	family member	friends┋family member	family member┋friends	friends┋family member	family member┋friends	family member	family member
532	2015/3/27 10:15:14	147seconds	60.217.106.119(山东-威海)	Recommender System	male	<=30	Computer	friends┋family member	family member┋friends	family member	friends┋family member	family member	none	none	none	none	none	friends┋family member	family member┋friends	friends┋family member	family member┋friends	family member	none	family member	friends┋family member	family member┋friends	family member	family member	friends┋family member	family member┋friends	friends┋family member	family member┋friends	friends┋family member	family member┋friends	family member	family member	family member
533	2015/3/27 10:15:20	220seconds	118.186.158.60(北京-北京)	Mobile Phone	femaile	<=30	notComputer	friends┋family member	none	friends	friends	friends	friends	none	friends┋family member	friends	none	friends	friends┋family member	family member┋friends	friends┋family member	family member┋friends	friends┋family member	family member┋friends	friends┋family member	family member┋friends	family member	friends┋family member	family member┋friends	friends	none	friends┋family member	friends	friends	none	none	family member
534	2015/3/27 10:30:18	100seconds	202.101.92.13(贵州-贵阳)	Recommender System	male	<=30	notComputer	none	none	friends	strangers	friends	strangers	friends	friends	friends	family member	family member	family member	friends	friends	family member	strangers	strangers	strangers	strangers	friends	friends	friends	friends	strangers	strangers	strangers	friends	friends	strangers	none
535	2015/3/27 10:32:07	69seconds	140.207.196.4(上海-上海)	Recommender System	male	<=30	notComputer	friends┋family member	family member┋friends	none	none	none	none	none	none	none	none	none	none	none	none	none	none	none	none	none	none	none	none	none	none	none	none	none	none	none	none
536	2015/3/27 10:35:46	178seconds	210.75.225.1(北京-北京)	Recommender System	male	<=30	Computer	friends┋family member	none	friends┋family member	none	friends┋family member	none	none	family member	none	none	none	friends┋family member	family member┋friends	family member	none	family member	friends┋family member	family member┋friends	none	none	friends┋family member	family member┋friends	friends┋family member	none	friends┋family member	family member┋friends	friends┋family member	none	none	none
537	2015/3/27 10:37:44	133seconds	42.49.109.169(湖南-湘潭)	Recommender System	male	<=30	notComputer	none	none	none	none	none	none	none	none	none	none	friends┋family member	family member┋friends	friends┋family member	family member┋friends	family member	friends	friends┋family member	family member┋friends	friends┋family member	none	friends┋family member┋strangers	friends┋family member	family member┋strangers┋friends	none	friends┋family member	family member┋friends	friends┋family member	family member┋friends	none	none
538	2015/3/27 10:44:21	114seconds	120.6.111.168(河北-秦皇岛)	Mobile Phone	male	<=30	notComputer	friends┋family member	family member┋friends	friends┋family member	none	none	none	none	friends┋family member┋strangers	none	none	friends┋family member┋strangers	friends┋family member┋strangers	friends┋family member┋strangers	family member	friends┋family member	family member┋friends	friends┋family member	family member┋strangers┋friends	family member┋strangers┋friends	family member	friends┋family member	friends	friends	friends	friends	friends	friends	family member	family member	family member
539	2015/3/27 10:45:20	132seconds	218.89.188.230(四川-成都)	Recommender System	femaile	<=30	notComputer	none	none	none	none	none	none	none	none	none	none	none	none	none	none	family member	none	friends┋family member	family member┋friends	none	none	none	none	none	none	none	none	none	none	none	none
540	2015/3/27 10:46:25	48seconds	119.79.142.231(湖北-武汉)	Recommender System	male	>30	notComputer	family member	family member	family member	family member	family member	family member	family member	family member	family member	family member	family member	family member	family member	family member	family member	family member	family member	family member	family member	family member	family member	family member	family member	family member	family member	family member	family member	family member	family member	family member
542	2015/3/27 10:51:01	174seconds	114.251.216.17(北京-北京)	Recommender System	femaile	<=30	notComputer	family member	family member	family member	family member	family member	family member	family member	family member	family member	family member	friends┋family member┋strangers	friends┋family member	family member┋friends	family member	family member	friends┋family member┋strangers	friends┋family member┋strangers	friends┋family member┋strangers	friends┋family member┋strangers	none	none	family member	family member	friends┋family member	family member	family member	family member	none	none	none
543	2015/3/27 10:54:05	120seconds	223.104.8.35(辽宁-沈阳)	Mobile Phone	male	<=30	notComputer	none	none	none	none	none	none	none	friends┋family member	none	none	friends	friends	family member	family member	family member	friends	friends┋family member	family member┋friends	friends┋family member	family member	friends┋family member┋strangers	friends┋family member	family member	family member	friends┋family member	family member┋friends	friends	family member	none	family member
544	2015/3/27 10:54:41	75seconds	182.148.111.27(四川-成都)	Mobile Phone	male	<=30	notComputer	none	strangers	friends	none	friends	friends	none	friends	strangers	friends	family member	strangers	family member	none	friends	family member	none	strangers	none	friends	strangers	family member	strangers	friends	strangers	strangers	friends	strangers	friends	friends
545	2015/3/27 10:56:32	95seconds	124.152.59.165(甘肃-兰州)	Mobile Phone	male	<=30	notComputer	family member	family member	family member	family member	family member	none	none	none	none	none	none	none	none	none	none	none	none	none	none	none	none	none	none	none	none	none	family member	none	none	none
546	2015/3/27 10:59:00	88seconds	159.226.149.189(北京-北京)	Recommender System	male	>30	notComputer	friends┋family member	family member	none	family member	none	none	family member	friends┋family member	family member	none	friends┋family member	family member	family member	family member	family member	family member	family member	family member	family member	family member	friends┋family member	family member	family member	family member	family member	family member	family member	family member	none	family member
547	2015/3/27 11:05:09	166seconds	58.242.186.178(安徽-芜湖)	Recommender System	male	<=30	notComputer	none	none	none	none	friends┋family member	family member┋friends	none	friends┋family member	none	friends┋family member	none	friends┋family member	none	friends┋family member	none	none	friends┋family member	family member┋friends	none	family member	none	friends┋family member	none	friends┋family member	family member┋friends	friends┋family member	family member┋friends	none	none	none
548	2015/3/27 11:07:40	207seconds	117.151.19.198(湖北-宜昌)	Mobile Phone	femaile	<=30	notComputer	none	friends┋family member	none	friends┋family member	family member┋friends	none	none	friends┋family member	friends	none	friends┋family member┋strangers	friends┋family member┋strangers	friends┋family member	family member┋friends	friends┋family member	friends	friends┋family member	family member┋friends	friends┋family member	family member	friends┋family member	friends	friends	none	friends┋family member	family member┋friends	friends┋family member	friends	none	none
549	2015/3/27 11:09:40	75seconds	180.99.180.255(江苏-南京)	Mobile Phone	male	<=30	notComputer	none	none	none	none	none	none	none	none	none	none	none	none	none	none	none	none	none	none	none	none	none	none	none	none	none	none	none	none	none	none
550	2015/3/27 11:11:53	103seconds	183.33.212.10(广东-珠海)	Recommender System	male	<=30	notComputer	friends┋family member	family member	family member	family member	friends	friends	friends┋family member	family member┋friends	family member	friends┋family member	family member┋friends	friends┋family member	family member┋friends	friends┋family member	family member┋friends	friends┋family member	family member┋friends	friends┋family member	family member┋friends	family member	friends┋family member	family member┋friends	family member	family member	friends┋family member	family member┋friends	friends┋family member	family member	family member	family member
551	2015/3/27 11:12:17	106seconds	10.32.8.168(未知-未知)	Mobile Phone	male	<=30	notComputer	family member	family member	family member	family member	family member	family member	family member	family member	family member	family member	family member	family member	family member	family member	family member	family member	family member	family member	family member	family member	family member	family member	family member	family member	family member	family member	family member	family member	family member	family member
553	2015/3/27 11:13:45	201seconds	111.200.92.96(北京-北京)	WeChat	male	<=30	notComputer	friends┋family member	family member┋strangers┋friends	family member┋strangers┋friends	family member┋strangers┋friends	family member┋strangers┋friends	none	friends┋family member	family member┋strangers┋friends	family member┋strangers┋friends	family member┋strangers┋friends	family member┋strangers┋friends	family member┋strangers┋friends	family member┋friends	friends┋family member	family member┋friends	friends┋family member┋strangers	friends┋family member┋strangers	friends┋family member┋strangers	friends┋family member┋strangers	friends┋family member	family member┋strangers┋friends	family member	friends┋family member┋strangers	family member	family member	friends┋family member┋strangers	friends┋family member┋strangers	friends┋family member┋strangers	family member	none
554	2015/3/27 11:15:33	86seconds	180.175.65.160(上海-上海)	Recommender System	male	>30	notComputer	friends	friends	family member	family member	family member	family member	family member	family member	family member	friends	friends	friends	friends	friends	family member	friends	friends	friends	friends	family member	family member	family member	family member	family member	family member	friends	friends	friends	none	family member
555	2015/3/27 11:16:33	187seconds	59.48.59.186(山西-忻州)	Mobile Phone	femaile	<=30	notComputer	friends┋family member	family member┋strangers┋friends	family member┋friends	none	none	none	none	friends┋family member	none	none	friends┋family member	family member┋friends	friends┋family member	family member	family member	friends┋family member	family member┋friends	friends┋family member	family member┋friends	none	friends┋family member┋strangers	family member	friends┋family member	none	none	friends┋family member	friends	none	none	none
556	2015/3/27 11:16:44	107seconds	121.207.35.119(福建-泉州)	Mobile Phone	male	<=30	Computer	friends┋family member	family member┋friends	friends┋family member	family member┋friends	friends┋family member	family member┋friends	friends┋family member	family member┋strangers┋friends	family member┋friends	friends┋family member	family member┋friends	friends┋family member	family member┋strangers┋friends	family member┋strangers┋friends	none	friends┋family member	family member┋strangers┋friends	family member┋strangers┋friends	family member┋strangers┋friends	none	friends┋family member	family member┋friends	friends┋family member	none	friends┋family member	family member┋friends	friends┋family member	none	none	none
557	2015/3/27 11:19:23	109seconds	222.204.54.29(江西-南昌)	Recommender System	male	<=30	notComputer	family member	none	none	friends	friends	none	none	friends	none	none	friends┋family member	family member┋friends	friends┋family member	family member┋friends	none	none	none	none	none	none	friends	none	friends	none	friends┋family member	friends	friends	none	none	none
559	2015/3/27 11:24:40	119seconds	140.206.255.101(上海-上海)	Mobile Phone	male	<=30	notComputer	friends	friends	friends	family member	family member	none	none	friends	none	none	friends	friends	friends	friends	none	friends	friends	friends	friends	family member	friends	friends	family member	family member	family member	family member	friends	none	none	none
560	2015/3/27 11:33:12	152seconds	210.35.99.247(上海-上海)	Recommender System	male	<=30	notComputer	friends	family member	family member	none	none	none	none	none	none	none	friends	friends	friends	friends	family member	friends	friends	friends	friends	family member	friends	friends	friends	family member	family member	friends	friends	family member	none	family member
561	2015/3/27 11:33:34	79seconds	113.57.228.234(湖北-武汉)	Recommender System	male	<=30	notComputer	family member	family member	none	none	none	none	none	none	none	none	none	none	none	none	none	none	none	none	none	none	none	none	none	none	none	none	none	none	none	none
562	2015/3/27 11:33:36	56seconds	124.126.89.0(北京-北京)	Recommender System	male	<=30	notComputer	friends	friends	friends	friends	friends	friends	friends	friends	friends	friends	friends	friends	friends	friends	family member	friends	strangers	family member	friends	friends	friends	friends	friends	friends	family member	friends	friends	family member	friends	friends
563	2015/3/27 11:42:01	56seconds	210.41.216.14(四川-成都)	Recommender System	male	<=30	notComputer	none	none	none	none	none	none	none	none	none	none	none	none	none	none	none	none	none	none	none	family member	none	none	family member	none	none	family member	none	none	none	none
564	2015/3/27 11:44:39	66seconds	42.95.106.161(甘肃-兰州)	Mobile Phone	femaile	<=30	notComputer	none	friends	friends	friends	friends	friends	friends	friends┋family member	friends	friends	friends┋family member	family member┋friends	friends┋family member	family member┋friends	friends┋family member	friends	friends	friends┋family member	family member┋friends	friends┋family member	friends	friends	friends	friends	friends	friends	friends	friends	friends	friends
565	2015/3/27 11:54:32	203seconds	120.201.47.57(辽宁-抚顺)	Recommender System	femaile	<=30	notComputer	friends┋family member	family member┋friends	friends┋family member	family member┋friends	friends┋family member	family member┋friends	friends┋family member	family member┋friends	friends┋family member	family member┋friends	friends┋family member┋strangers	friends┋family member┋strangers	friends┋family member┋strangers	friends┋family member	family member┋friends	friends┋family member	family member┋friends	friends┋family member┋strangers	friends┋family member┋strangers	family member	friends┋family member┋strangers	friends┋family member	family member┋friends	friends┋family member	family member┋friends	friends┋family member	family member┋friends	family member	friends┋family member	family member
566	2015/3/27 11:56:01	81seconds	61.136.211.58(湖北-未知)	Mobile Phone	male	<=30	notComputer	family member	family member	family member	family member	family member	family member	family member	family member	family member	family member	family member	family member	family member	family member	family member	family member	family member	family member	family member	family member	family member	family member	friends	family member	family member	friends	friends	friends	friends	friends
567	2015/3/27 12:06:12	46seconds	218.76.28.46(湖南-长沙)	Recommender System	male	<=30	notComputer	family member	family member	family member	family member	friends	family member	friends	friends	family member	family member	family member	friends┋family member	friends	strangers┋friends	family member	friends	friends┋family member	family member	family member	family member	friends	friends	family member	family member	family member	friends	friends	family member	friends┋family member	family member┋friends
568	2015/3/27 12:11:14	86seconds	118.186.252.146(北京-北京)	WeChat	femaile	<=30	Computer	family member	family member	family member	family member	family member	family member	family member	family member	family member	family member	friends┋family member	family member	family member	family member	family member	friends┋family member	family member┋friends	friends┋family member	family member┋friends	family member	family member	friends┋family member	family member┋friends	family member	friends┋family member	family member	family member	friends┋family member	family member	family member
569	2015/3/27 12:49:06	114seconds	111.16.199.190(山东-威海)	Mobile Phone	femaile	<=30	notComputer	family member	none	none	none	none	none	none	friends┋family member	none	none	friends┋family member	family member┋friends	friends┋family member	family member┋friends	friends┋family member	none	friends┋family member	family member┋friends	friends┋family member	none	none	none	none	friends┋family member	family member┋friends	friends┋family member	family member┋friends	none	none	none
570	2015/3/27 12:49:14	88seconds	58.60.1.62(广东-深圳)	Mobile Phone	male	<=30	notComputer	family member	friends	friends┋family member	none	none	friends	friends	family member	friends	friends	none	strangers	friends	family member	family member	friends	friends	friends	family member	family member	family member	family member	friends	friends	friends	family member	family member	friends┋family member	friends	friends
571	2015/3/27 12:49:30	60seconds	58.246.161.124(上海-上海)	Recommender System	male	<=30	notComputer	none	none	none	strangers	strangers	strangers	strangers	strangers	strangers	friends	friends	friends	friends	friends	friends	friends	friends	friends	friends	friends	friends	family member	family member	family member	family member	family member	family member	family member	family member	family member
573	2015/3/27 13:04:30	164seconds	220.175.105.167(江西-南昌)	Mobile Phone	male	<=30	notComputer	strangers┋friends	strangers	none	none	none	none	none	friends	friends┋family member	family member┋friends	strangers┋friends	family member┋friends	friends┋family member	family member┋friends	friends┋family member	friends	friends	friends	none	none	friends	friends	friends	none	friends	none	none	none	none	none
575	2015/3/27 13:17:37	107seconds	112.64.207.114(上海-上海)	Recommender System	male	<=30	Computer	none	friends┋family member┋strangers	none	none	friends┋family member	none	none	friends┋family member	none	none	friends┋family member	family member┋friends	friends┋family member	family member┋friends	friends┋family member	none	friends┋family member	family member┋friends	friends┋family member	family member	friends┋family member	none	none	none	none	none	none	none	none	none
576	2015/3/27 13:26:20	65seconds	139.227.93.119(上海-上海)	Recommender System	femaile	<=30	notComputer	none	none	none	none	none	none	none	none	none	none	none	none	none	none	none	none	none	none	none	none	none	none	none	none	none	none	none	none	none	none
577	2015/3/27 13:30:11	67seconds	223.104.2.11(山东-青岛)	Mobile Phone	femaile	<=30	notComputer	friends┋family member	family member┋strangers┋friends	family member┋friends	friends┋family member	family member┋friends	friends	friends┋family member	friends┋strangers	strangers	strangers	family member	friends	strangers	none	family member	friends	strangers	none	family member	friends	strangers	none	family member	friends	strangers	none	family member	friends	strangers	none
578	2015/3/27 13:47:16	145seconds	1.202.239.120(北京-北京)	Recommender System	male	>30	notComputer	friends┋family member	family member┋friends	friends┋family member	none	none	none	none	friends┋family member	none	friends┋family member	family member┋friends	friends┋family member	family member┋friends	friends┋family member	none	none	none	friends┋family member	none	none	friends┋family member	none	none	family member	none	none	friends┋family member	none	none	none
579	2015/3/27 14:13:56	121seconds	119.78.132.47(山东-未知)	Recommender System	femaile	<=30	notComputer	family member	none	none	friends┋family member	family member┋friends	friends┋family member	none	friends┋family member	family member┋friends	none	friends┋family member	family member┋friends	friends┋family member	family member┋friends	family member	friends┋family member	family member┋friends	friends┋family member	none	family member	friends┋family member	family member┋friends	friends┋family member	family member	family member	friends	friends	none	none	family member
580	2015/3/27 14:14:42	37seconds	60.29.153.22(天津-天津)	Recommender System	femaile	<=30	notComputer	none	none	none	none	none	none	none	none	none	none	none	none	none	none	none	none	none	none	none	none	none	none	none	none	none	none	none	none	none	none
581	2015/3/27 14:27:21	1909seconds	223.104.21.139(河南-郑州)	Mobile Phone	male	<=30	notComputer	strangers	none	strangers	none	strangers	none	strangers	none	strangers	none	strangers	none	strangers	none	strangers	none	strangers	none	strangers	none	strangers	none	strangers	none	strangers	none	strangers	none	strangers	none
582	2015/3/27 14:29:35	105seconds	117.136.19.4(江苏-南京)	Mobile Phone	male	<=30	notComputer	none	friends┋family member	family member┋friends	friends┋family member	family member┋friends	friends┋family member	family member┋friends	friends┋family member	family member┋friends	friends┋family member	family member┋friends	friends┋family member	family member┋friends	family member	none	friends┋family member	family member┋friends	friends┋family member	none	family member	friends┋family member	family member┋friends	friends┋family member	family member┋friends	family member	friends┋family member	family member┋friends	friends┋family member	family member┋friends	family member
583	2015/3/27 14:31:42	35seconds	122.193.143.37(江苏-无锡)	Recommender System	male	<=30	notComputer	none	none	none	none	none	none	none	none	none	none	none	none	none	none	none	none	none	none	none	none	none	none	none	none	none	none	none	none	none	none
584	2015/3/27 14:54:17	65seconds	118.186.158.60(北京-北京)	Mobile Phone	male	<=30	notComputer	strangers┋friends	family member┋friends	friends	strangers┋friends	friends┋strangers	strangers┋friends	friends	strangers┋family member	strangers	friends	strangers┋friends	friends	friends	strangers┋family member	friends┋strangers	strangers┋family member	strangers	strangers┋friends	family member┋strangers	strangers┋friends	friends┋strangers	strangers┋friends	friends	friends	friends┋family member	friends┋strangers	strangers┋friends	strangers	strangers┋friends	strangers
585	2015/3/27 15:03:58	93seconds	125.39.51.192(天津-天津)	Recommender System	femaile	<=30	notComputer	friends┋family member	family member┋friends	friends┋family member	none	friends	friends	family member	friends┋family member	friends	friends	friends	friends	friends	friends	friends	friends	friends┋family member	friends	friends	family member	friends	friends	friends	friends	friends	friends┋family member	family member┋friends	friends┋family member	none	family member
586	2015/3/27 15:20:30	104seconds	182.18.105.115(北京-北京)	Recommender System	femaile	<=30	notComputer	family member	friends	family member	family member	family member	family member	family member	family member	family member	family member	family member	family member	family member	family member	family member	family member	family member	family member	family member	family member	family member	family member	family member	family member	family member	family member	family member	family member	family member	family member
587	2015/3/27 15:21:00	93seconds	111.175.187.103(湖北-武汉)	Recommender System	male	<=30	notComputer	friends┋family member	family member┋friends	friends┋family member	family member┋friends	none	none	none	friends┋family member	none	none	none	none	friends┋family member	family member	family member	family member	family member	friends┋family member	family member┋friends	none	friends┋family member	family member┋friends	friends┋family member	none	none	friends┋family member	family member┋friends	none	none	none
588	2015/3/27 15:25:26	66seconds	218.64.17.228(江西-南昌)	Recommender System	male	>30	notComputer	friends┋family member	friends	friends	friends	friends	friends	friends	friends	friends	friends┋family member	friends	friends	friends	friends	friends	friends	friends	friends	friends	friends	friends	friends	friends	friends	friends	friends	friends	friends	friends	friends
589	2015/3/27 15:30:40	70seconds	117.136.35.6(江苏-南京)	Mobile Phone	femaile	<=30	notComputer	family member	family member	family member	family member	family member	family member	family member	family member	family member	family member	family member	family member	family member	family member	family member	family member	family member	family member	family member	family member	family member	friends┋family member	family member	friends┋family member	family member┋friends	friends┋family member	friends	friends┋family member	family member┋friends	friends┋family member
590	2015/3/27 15:38:22	63seconds	114.246.125.56(北京-北京)	Recommender System	male	<=30	notComputer	friends	friends	none	none	none	none	none	friends	none	none	none	none	none	none	none	none	none	none	none	none	none	none	none	none	none	none	none	none	none	none
591	2015/3/27 15:42:45	125seconds	124.16.70.179(北京-北京)	Recommender System	male	<=30	notComputer	friends	none	none	none	none	none	none	family member	none	none	friends	friends	friends	family member	family member	friends	friends	friends	friends	family member	family member	friends	friends	friends	none	none	none	none	none	none
592	2015/3/27 15:49:48	55seconds	202.204.198.21(北京-北京)	Recommender System	male	<=30	notComputer	none	none	none	none	none	none	none	none	none	none	none	none	none	none	none	none	none	none	none	none	none	none	none	none	none	none	none	none	none	none
593	2015/3/27 15:50:16	131seconds	180.160.20.80(上海-上海)	Recommender System	male	<=30	notComputer	friends	friends	family member	friends	friends	friends	friends	friends	friends	friends	strangers┋friends	friends	friends	friends┋family member┋strangers	family member	friends	friends	friends	friends	family member	friends┋family member┋strangers	none	friends	none	none	friends	friends	none	none	none
594	2015/3/27 15:58:22	66seconds	223.81.98.180(山东-青岛)	Mobile Phone	femaile	<=30	notComputer	none	none	none	none	none	none	none	none	none	none	none	none	none	none	none	none	none	none	none	none	none	none	none	none	none	none	none	none	none	none
596	2015/3/27 16:39:53	119seconds	122.193.143.40(江苏-无锡)	Recommender System	male	<=30	notComputer	friends┋family member	family member┋friends	none	friends	none	strangers	friends	friends┋family member	strangers	friends	friends	family member	family member	family member	family member	friends	family member	friends┋family member	family member	family member	friends	family member	family member	none	friends	friends	friends	none	none	none
597	2015/3/27 16:41:03	180seconds	223.81.192.26(山东-青岛)	Recommender System	femaile	<=30	notComputer	none	friends┋family member┋strangers	friends┋family member	family member┋strangers┋friends	family member┋friends	friends┋family member	none	none	none	none	none	friends┋family member	family member┋friends	family member	family member	none	friends┋family member	family member┋friends	none	family member	friends┋family member┋strangers	none	none	friends┋family member	family member	none	friends┋family member	none	none	none
598	2015/3/27 16:43:57	78seconds	59.46.158.70(辽宁-大连)	Recommender System	male	<=30	notComputer	friends┋family member	family member┋friends	none	none	friends┋family member┋strangers	none	none	none	none	none	friends┋family member	family member┋friends	friends┋family member	none	none	none	friends┋family member	family member┋friends	friends┋family member	none	none	none	none	none	none	none	none	none	none	none
599	2015/3/27 16:44:04	90seconds	223.81.192.26(山东-青岛)	Recommender System	femaile	<=30	notComputer	none	friends┋family member┋strangers	none	none	friends┋family member	none	none	none	none	none	friends┋family member	family member┋friends	friends┋family member	family member	family member	none	friends┋family member	family member┋friends	none	family member	friends┋family member┋strangers	none	none	friends┋family member	family member┋friends	friends┋family member	family member┋friends	none	none	none
600	2015/3/27 16:45:47	73seconds	222.133.182.210(山东-日照)	Recommender System	male	<=30	notComputer	none	none	none	none	none	none	none	none	none	none	none	friends┋family member	family member┋friends	none	none	none	none	none	none	none	none	none	none	none	none	none	none	none	none	none
601	2015/3/27 16:51:45	139seconds	106.39.41.161(北京-北京)	Recommender System	male	<=30	notComputer	family member	friends	none	friends┋family member	family member┋friends	friends┋family member	none	friends┋family member┋strangers	friends┋family member┋strangers	friends┋family member	family member┋strangers┋friends	family member┋friends	family member	friends┋family member	family member	friends┋family member┋strangers	friends┋family member	family member┋friends	friends┋family member	none	friends┋family member┋strangers	family member	family member	family member	family member	friends┋family member	family member┋strangers┋friends	family member	none	none
603	2015/3/27 16:58:43	90seconds	115.150.224.110(江西-南昌)	Recommender System	femaile	<=30	notComputer	family member	family member	none	none	friends	none	none	friends	none	none	family member	family member	family member	family member	family member	family member	family member	friends	family member	none	family member	family member	family member	friends	friends	family member	none	none	none	family member
604	2015/3/27 17:01:53	79seconds	61.132.138.212(安徽-合肥)	Recommender System	male	<=30	notComputer	family member	friends	friends	friends	friends	friends	friends	friends	friends	family member	friends	friends	friends	friends	friends	friends	friends	friends	friends	family member	friends	friends	friends	friends	friends	friends	friends	friends	friends	friends
605	2015/3/27 17:43:01	93seconds	39.64.212.163(山东-济南)	Recommender System	femaile	<=30	notComputer	none	none	none	none	none	none	none	none	family member	none	none	none	none	none	none	none	none	none	none	none	none	none	none	family member	none	none	none	family member	family member	none
606	2015/3/27 17:46:36	61seconds	113.227.14.102(辽宁-大连)	Mobile Phone	male	<=30	notComputer	none	none	none	none	none	none	none	none	none	none	none	none	none	none	none	none	none	none	none	none	none	none	none	none	none	none	none	none	none	none
607	2015/3/27 18:10:51	123seconds	61.136.211.59(湖北-未知)	Recommender System	male	<=30	notComputer	none	none	none	friends	friends	none	none	friends┋family member┋strangers	none	none	none	none	none	none	none	friends┋family member	family member┋friends	none	none	none	none	none	none	none	friends┋family member	family member┋friends	friends	none	none	none
608	2015/3/27 18:13:10	132seconds	111.117.112.1(辽宁-大连)	Recommender System	femaile	<=30	notComputer	family member	friends┋family member	family member	family member	friends┋family member	none	friends┋family member	family member	none	none	friends┋family member┋strangers	friends┋family member	family member┋friends	friends┋family member	family member┋friends	friends┋family member	family member┋friends	friends┋family member	family member┋strangers┋friends	family member	none	none	none	none	none	none	none	none	none	none
609	2015/3/27 18:15:11	113seconds	134.158.92.95(未知-未知)	Recommender System	male	<=30	notComputer	friends┋family member	family member┋friends	friends┋family member	none	none	none	none	friends┋family member	none	none	friends┋family member	family member┋friends	friends┋family member	none	none	none	friends┋family member	family member┋strangers┋friends	family member┋friends	none	friends┋family member┋strangers	none	none	none	none	friends┋family member┋strangers	friends┋family member	none	none	none
610	2015/3/27 18:28:00	69seconds	122.80.243.44(山东-潍坊)	Mobile Phone	femaile	<=30	notComputer	none	none	none	none	none	none	none	none	none	none	none	none	none	none	none	none	none	none	none	none	none	none	none	none	none	none	none	none	none	none
611	2015/3/27 18:50:02	56seconds	219.147.0.9(山东-淄博)	Recommender System	male	<=30	notComputer	none	none	none	family member	none	none	none	none	none	none	none	none	none	none	none	none	none	none	none	none	none	none	none	none	none	none	none	none	none	none
612	2015/3/27 18:55:51	54seconds	117.151.44.242(湖北-宜昌)	Recommender System	male	<=30	notComputer	family member	family member	family member	family member	family member	family member	family member	family member	family member	family member	family member	family member	family member	family member	family member	family member	family member	family member	family member	family member	family member	family member	family member	family member	family member	family member	family member	family member	family member	family member
614	2015/3/27 19:49:51	118seconds	221.224.9.35(江苏-苏州)	Recommender System	femaile	<=30	notComputer	none	none	none	none	none	none	none	none	none	none	none	none	none	none	none	none	none	none	none	none	none	none	none	none	none	none	none	none	none	none
615	2015/3/27 20:03:13	102seconds	125.38.65.99(天津-天津)	Recommender System	male	<=30	notComputer	friends┋family member	family member┋friends	friends┋family member	family member┋friends	friends┋family member	family member┋friends	friends┋family member	family member┋friends	friends┋family member	family member┋friends	friends┋family member	family member┋friends	friends┋family member	family member┋friends	friends┋family member	family member┋friends	friends┋family member	family member┋friends	friends┋family member	family member	family member	family member	family member	family member	family member	family member	family member	family member	family member	family member
616	2015/3/27 20:04:02	214seconds	221.181.104.200(上海-上海)	Mobile Phone	male	<=30	notComputer	none	friends┋family member	none	friends	friends┋family member	none	none	friends┋family member	strangers	none	strangers	strangers	none	none	none	friends┋family member	family member┋strangers┋friends	strangers	strangers	none	strangers	none	none	none	none	none	strangers	none	none	none
617	2015/3/27 20:05:41	128seconds	180.111.138.68(江苏-南京)	Recommender System	male	<=30	notComputer	friends	friends	family member	family member	family member	friends	none	family member	none	none	strangers	strangers	strangers	strangers	family member	none	strangers	strangers	strangers	family member	strangers	none	none	family member	none	friends	friends	none	none	none
618	2015/3/27 20:12:51	173seconds	58.243.47.201(安徽-合肥)	Mobile Phone	male	<=30	notComputer	friends┋family member	family member┋friends	friends┋family member	family member┋friends	friends┋family member┋strangers	friends┋family member	family member┋friends	friends┋family member	family member┋friends	friends┋family member	family member┋strangers┋friends	family member┋friends	friends┋family member	family member┋friends	family member	friends┋family member┋strangers	friends┋family member	family member┋strangers┋friends	family member┋strangers┋friends	family member┋friends	friends┋family member┋strangers	friends┋family member	family member┋strangers┋friends	family member	friends┋family member┋strangers	friends┋family member┋strangers	friends┋family member┋strangers	friends┋family member	family member	family member
619	2015/3/27 20:26:01	105seconds	183.64.203.221(重庆-重庆)	Recommender System	male	<=30	notComputer	friends┋family member	family member┋friends	friends┋family member	none	friends┋family member	family member┋friends	friends┋family member	family member┋friends	friends┋family member	family member┋friends	friends┋family member	family member┋friends	friends┋family member	family member┋friends	friends┋family member	family member┋friends	friends┋family member	family member┋friends	friends┋family member	family member┋friends	friends┋family member	family member	friends┋family member	family member	friends┋family member	family member┋friends	friends┋family member	family member	none	family member
620	2015/3/27 20:46:38	61seconds	159.226.159.204(北京-北京)	Recommender System	male	<=30	notComputer	family member	family member	family member	family member	family member	family member	friends	friends	friends	family member	friends	friends	friends	friends	friends	friends	friends	friends	friends	family member	strangers	friends	friends	friends	friends	friends	friends	friends	family member	family member
621	2015/3/27 20:50:37	113seconds	117.135.212.20(贵州-贵阳)	Recommender System	femaile	<=30	notComputer	friends	friends	none	none	none	none	none	friends	none	none	none	friends	friends	none	none	none	none	friends	none	none	none	none	none	none	none	none	none	none	none	none
623	2015/3/27 21:25:52	162seconds	222.169.202.135(吉林-长春)	Recommender System	male	<=30	notComputer	none	none	none	none	friends┋family member	none	none	friends┋family member	none	none	strangers	friends┋family member	family member	none	none	friends	friends┋family member	family member┋friends	none	none	family member	family member	friends┋family member	none	friends┋family member	family member┋friends	friends┋family member	none	none	none
624	2015/3/27 21:44:10	90seconds	111.37.7.128(山东-菏泽)	Mobile Phone	male	<=30	notComputer	none	none	none	none	none	none	none	none	none	none	none	none	none	none	none	none	none	none	none	none	none	none	none	none	none	none	none	none	none	none
625	2015/3/27 21:46:10	57seconds	111.37.7.128(山东-菏泽)	Mobile Phone	male	<=30	notComputer	none	none	none	none	none	none	none	none	none	none	none	none	none	none	none	none	none	none	none	none	none	none	none	none	none	none	friends	none	none	none
626	2015/3/27 22:32:37	61seconds	27.19.61.80(湖北-武汉)	Recommender System	male	<=30	notComputer	friends	none	none	friends	strangers	strangers	strangers	strangers	friends	friends	family member	family member	strangers	none	friends	strangers	strangers	friends	friends	friends	strangers	friends	strangers	strangers	friends	strangers	strangers	strangers	strangers	strangers
627	2015/3/27 22:35:58	47seconds	180.124.140.198(江苏-徐州)	Mobile Phone	male	>30	notComputer	family member	family member	family member	family member	family member	family member	family member	family member	family member	family member	family member	family member	friends	friends	family member	family member	friends	friends	friends	friends	friends	friends	family member	friends	family member	family member	friends	strangers┋family member	strangers	strangers
628	2015/3/27 23:09:41	73seconds	126.87.126.221(未知-未知)	Mobile Phone	male	>30	notComputer	none	none	strangers	none	strangers	friends	friends	friends	strangers	strangers	strangers	friends	strangers┋friends	friends	friends	friends	friends	friends	friends	friends	strangers	strangers	friends	friends	friends	friends	strangers┋friends	strangers	strangers┋friends	friends
629	2015/3/27 23:12:39	34seconds	175.0.172.34(湖南-长沙)	Recommender System	male	<=30	Computer	family member	family member	family member	family member	family member	family member	family member	family member	family member	family member	friends	friends	friends	friends	friends	friends	friends	friends	friends	family member	family member	family member	family member	family member	family member	family member	family member	family member	family member	family member
630	2015/3/27 23:51:23	102seconds	106.46.242.104(河南-郑州)	WeChat	femaile	<=30	notComputer	none	none	none	none	friends	friends	none	none	none	none	none	none	none	none	none	none	none	none	none	none	none	none	none	none	none	none	none	none	none	none
631	2015/3/27 23:54:23	76seconds	218.106.145.9(福建-福州)	Recommender System	femaile	<=30	notComputer	family member	family member	family member	friends┋family member	friends	none	none	none	none	none	none	none	none	none	none	none	friends	friends	none	none	none	none	none	none	friends	friends	none	friends	none	none
632	2015/3/27 23:55:24	48seconds	118.206.226.231(湖南-长沙)	Recommender System	male	<=30	notComputer	none	none	none	none	none	none	none	none	none	none	none	none	none	none	none	none	none	none	none	none	none	none	none	none	none	none	none	none	none	none
633	2015/3/28 0:09:33	113seconds	117.45.226.16(江西-九江)	Mobile Phone	male	<=30	notComputer	friends	friends	friends	friends	none	none	none	none	none	none	strangers	strangers	friends	friends	friends	friends	friends	friends	friends	none	friends	strangers	friends	family member	friends	friends	friends	strangers	friends	none
635	2015/3/28 4:54:17	191seconds	112.224.67.214(山东-青岛)	Mobile Phone	male	>30	notComputer	friends┋family member	family member	family member	none	none	none	family member	family member	none	none	friends┋family member	family member┋friends	friends┋family member	none	none	friends┋family member	family member┋friends	friends┋family member	none	none	none	friends┋family member	none	none	none	friends┋family member	family member┋friends	none	none	none
636	2015/3/28 5:35:45	63seconds	129.93.97.199(未知-未知)	Recommender System	femaile	>30	notComputer	none	none	none	none	none	none	none	none	none	none	none	none	none	none	none	none	none	none	none	none	none	none	none	none	none	none	none	none	none	none
637	2015/3/28 5:58:59	124seconds	223.104.10.75(江西-南昌)	Mobile Phone	male	<=30	notComputer	friends┋family member	friends	none	none	none	none	none	friends┋family member	none	none	none	none	none	friends	none	none	none	none	none	none	none	none	none	none	none	none	none	none	none	none
639	2015/3/28 6:19:08	48seconds	120.4.248.170(河北-唐山)	Recommender System	male	>30	notComputer	family member	friends	friends	friends	friends	friends	friends	friends	friends	family member	family member	family member	family member	family member	family member	family member	family member	family member	family member	family member	family member	family member	family member	family member	family member	family member	family member	family member	family member	family member
640	2015/3/28 6:30:52	116seconds	60.23.41.244(辽宁-锦州)	Recommender System	male	>30	notComputer	family member	family member	friends┋family member	family member	family member	none	none	none	none	none	none	none	none	none	none	none	none	none	none	none	none	none	none	none	none	none	none	none	none	none
641	2015/3/28 6:43:58	131seconds	60.171.124.72(安徽-马鞍山)	Recommender System	male	>30	notComputer	none	family member	family member	family member	friends	family member	family member	family member	family member	family member	family member	family member	friends	friends	family member	friends	friends	family member	strangers	none	friends	friends	friends	strangers	friends	friends	friends	family member	friends	friends
642	2015/3/28 7:37:45	238seconds	10.37.230.248(未知-未知)	Mobile Phone	male	<=30	notComputer	none	none	none	none	none	none	none	friends	none	none	none	none	none	family member	family member	none	friends	friends	friends	family member	none	none	none	friends┋family member	family member	friends	friends	none	none	none
643	2015/3/28 7:41:33	138seconds	120.194.5.211(河南-郑州)	Mobile Phone	femaile	<=30	notComputer	none	none	none	friends	friends┋family member	friends	friends┋family member	family member┋friends	friends┋family member	family member┋friends	friends┋family member┋strangers	friends┋family member	family member	friends┋family member	none	friends	friends┋family member	family member┋friends	friends┋family member	none	friends┋family member┋strangers	friends┋family member	family member┋friends	none	friends┋family member	family member┋friends	friends┋family member	family member	none	none
644	2015/3/28 7:44:43	99seconds	124.205.212.218(北京-北京)	Mobile Phone	femaile	<=30	notComputer	friends┋family member	family member┋strangers┋friends	family member┋friends	friends┋family member	family member┋strangers┋friends	family member┋friends	family member	friends┋family member┋strangers	friends┋family member	family member┋friends	friends┋family member	family member┋strangers┋friends	family member┋friends	friends┋family member	family member┋friends	friends┋family member	family member┋friends	friends┋family member	family member┋friends	friends┋family member	family member┋strangers┋friends	family member┋friends	friends┋family member	family member┋friends	friends┋family member	family member┋friends	friends┋family member	family member┋friends	friends┋family member	family member┋friends
645	2015/3/28 8:04:06	136seconds	223.104.2.204(山东-青岛)	Mobile Phone	male	<=30	Computer	friends┋family member	family member┋strangers┋friends	none	friends┋family member┋strangers	friends┋family member	family member┋friends	family member	friends┋family member┋strangers	friends┋family member	family member┋friends	friends┋family member	family member┋friends	friends┋family member	family member┋friends	friends┋family member	family member┋friends	friends┋family member	family member┋friends	friends┋family member	family member┋friends	friends┋family member	family member┋friends	friends┋family member	family member┋friends	friends┋family member	family member┋friends	family member	family member	family member	family member
646	2015/3/28 8:04:20	127seconds	221.204.162.89(山西-太原)	Mobile Phone	male	<=30	notComputer	friends┋family member┋strangers	friends┋family member┋strangers	family member	none	none	none	none	friends┋family member┋strangers	none	none	none	none	none	none	none	none	strangers┋friends	friends	none	none	none	none	none	friends┋family member┋strangers	none	friends┋family member┋strangers	none	none	none	none
647	2015/3/28 8:18:14	94seconds	115.154.100.3(陕西-西安)	Mobile Phone	male	<=30	notComputer	friends	friends	friends	friends	family member	friends	family member	friends	friends	friends	friends	friends	friends	friends	friends	friends	friends	friends	friends	friends	friends	friends	friends	friends	friends	friends	friends	friends	friends	friends
648	2015/3/28 8:36:44	73seconds	60.29.153.55(天津-天津)	Mobile Phone	male	<=30	notComputer	strangers	strangers	friends	friends	family member	friends	strangers	strangers┋friends	strangers	friends	strangers	friends	friends	strangers	friends	strangers┋friends	friends	friends	strangers	friends	friends	strangers┋friends	friends	friends	friends	friends	friends	strangers	strangers	friends
649	2015/3/28 8:46:05	237seconds	119.87.77.54(重庆-重庆)	Mobile Phone	male	<=30	Computer	friends┋family member	friends	friends	strangers	friends	friends	friends	friends┋family member	family member┋friends	friends┋family member	friends┋strangers	strangers┋friends	friends┋strangers	strangers┋friends	friends┋strangers	strangers┋friends	friends	strangers┋friends	friends┋strangers	family member	friends┋family member	family member┋friends	friends	friends	friends	friends	friends	strangers	strangers	family member
651	2015/3/28 9:43:27	97seconds	125.39.156.9(天津-天津)	Mobile Phone	femaile	<=30	notComputer	family member	friends	none	family member	family member	none	none	friends┋family member┋strangers	friends┋family member	family member	friends┋family member┋strangers	friends┋family member	family member┋friends	friends┋family member	family member┋friends	friends┋family member	family member┋friends	friends┋family member	family member┋friends	family member	family member	family member	family member	family member	family member	family member	friends┋family member	friends	friends	family member
652	2015/3/28 10:49:14	74seconds	123.151.21.22(天津-天津)	Recommender System	male	<=30	notComputer	none	none	none	none	none	none	none	friends	friends	none	friends	friends	friends	friends	friends	friends	friends	friends	friends	none	friends	friends	friends	friends	friends	friends	friends	friends	friends	friends
653	2015/3/28 11:08:35	66seconds	113.140.84.100(陕西-西安)	Recommender System	male	<=30	notComputer	friends	friends	friends	friends	friends	friends	friends	friends	friends	friends	friends	friends	friends	friends	friends	friends	friends	friends	friends	none	friends	friends	friends	friends	friends	friends	friends	friends	friends	friends
654	2015/3/28 11:16:54	144seconds	36.36.104.102(广东-深圳)	Recommender System	male	<=30	notComputer	none	family member	friends	family member	family member	none	friends┋family member	friends	none	family member	friends┋family member	family member┋friends	friends┋family member	family member┋friends	friends┋family member	none	friends┋family member	friends	friends┋family member	none	none	friends	none	family member	friends┋family member	family member┋friends	friends┋family member	friends	none	none
655	2015/3/28 11:25:09	94seconds	101.5.241.1(北京-北京)	Recommender System	male	<=30	notComputer	friends┋family member	family member	none	none	none	none	none	none	none	friends┋family member	family member┋friends	friends┋family member	family member┋friends	friends┋family member	family member┋friends	friends┋family member┋strangers	friends┋family member	family member┋strangers┋friends	family member┋strangers┋friends	none	none	none	none	none	none	none	friends┋family member┋strangers	none	none	none
656	2015/3/28 11:31:29	144seconds	125.211.210.197(黑龙江-哈尔滨)	Mobile Phone	male	<=30	notComputer	none	none	none	none	none	friends	none	none	none	none	none	friends	family member	friends┋family member	family member┋friends	none	friends┋family member	family member┋strangers┋friends	none	none	none	none	none	none	none	none	none	none	none	none
657	2015/3/28 12:07:36	118seconds	123.124.183.253(北京-北京)	Recommender System	femaile	<=30	notComputer	family member	none	family member	none	friends	none	none	friends┋family member	none	none	none	none	none	friends┋family member	none	none	none	none	friends┋family member	none	none	none	none	none	none	friends┋family member	friends	none	none	none
658	2015/3/28 12:09:49	46seconds	159.226.182.15(北京-北京)	Recommender System	male	<=30	Computer	friends	friends	friends	friends	none	none	none	none	none	none	none	none	none	none	none	none	none	none	none	none	none	none	none	none	none	none	none	none	none	none
659	2015/3/28 12:45:39	58seconds	36.48.108.66(吉林-长春)	Recommender System	male	<=30	notComputer	none	none	none	none	none	none	none	none	none	none	friends	none	none	none	none	none	none	none	none	none	none	none	none	none	none	none	none	none	none	none
660	2015/3/28 12:49:47	298seconds	111.37.6.132(山东-济南)	Mobile Phone	femaile	<=30	notComputer	family member	strangers	none	friends┋family member	friends	friends┋family member	none	friends┋family member┋strangers	friends	friends┋family member	family member┋strangers┋friends	family member┋friends	friends┋family member	family member┋friends	family member	none	family member	friends┋family member	none	none	friends┋family member┋strangers	friends┋family member	friends	none	none	none	friends┋family member	none	none	none
661	2015/3/28 12:49:58	109seconds	111.225.57.4(河北-保定)	Mobile Phone	male	<=30	notComputer	family member	family member	none	family member	family member	none	none	friends	family member	friends	friends	friends	friends	family member	family member	family member	family member	friends	family member	friends	friends	family member	family member	friends	friends	family member	friends	family member	none	none
662	2015/3/28 12:59:44	239seconds	61.138.125.6(内蒙古-包头)	Mobile Phone	male	<=30	notComputer	friends	friends	none	family member	strangers┋friends	friends	friends	strangers	strangers	friends	none	family member	family member	friends┋family member	family member	friends	friends	friends	friends┋family member	family member	none	friends┋family member	family member	none	none	friends┋family member	family member┋friends	none	none	none
663	2015/3/28 13:15:32	81seconds	106.39.41.144(北京-北京)	Recommender System	femaile	<=30	notComputer	friends┋family member	family member┋friends	none	friends┋family member	family member┋friends	none	friends	friends	friends	none	friends┋family member	family member┋friends	friends	friends┋family member	family member	family member	family member	family member	family member	family member	family member	family member	family member	family member	family member	family member	family member	family member	friends	family member
664	2015/3/28 13:41:08	151seconds	133.60.10.148(未知-未知)	Recommender System	male	<=30	notComputer	none	none	none	friends┋family member	none	none	none	friends┋family member	none	none	friends┋family member	family member	none	none	none	none	family member	family member	none	none	none	none	none	none	none	none	family member	none	none	none
665	2015/3/28 13:53:32	107seconds	171.112.96.51(湖北-随州)	Recommender System	femaile	<=30	notComputer	family member	none	none	friends┋family member	none	friends	none	friends┋family member	none	none	friends┋family member┋strangers	none	friends┋family member┋strangers	friends┋family member	family member┋friends	none	friends┋family member	family member┋friends	friends┋family member	none	none	none	none	friends┋family member	family member┋friends	none	none	none	none	none
666	2015/3/28 14:23:02	97seconds	202.115.150.6(四川-成都)	Recommender System	male	<=30	notComputer	family member	family member	friends┋family member	family member┋friends	family member	family member	friends┋family member	family member┋strangers┋friends	friends	friends┋family member	family member┋strangers┋friends	family member┋friends	friends┋family member	family member┋friends	family member	family member	friends┋family member	family member┋friends	family member	family member	family member	family member	family member	family member	friends┋family member	family member┋friends	friends┋family member	family member┋friends	friends┋family member	family member
667	2015/3/28 14:23:16	106seconds	111.180.188.164(湖北-十堰)	Recommender System	male	>30	notComputer	family member	friends	none	none	none	none	none	none	none	none	none	friends	friends	none	none	friends	none	none	none	none	none	none	none	none	none	friends	friends	none	none	none
669	2015/3/28 14:31:17	100seconds	221.180.226.225(辽宁-沈阳)	Mobile Phone	femaile	<=30	notComputer	family member	family member	family member	friends	friends	family member	none	none	friends	none	friends	none	strangers	friends	friends	strangers	strangers	friends	friends	friends	friends	family member	friends	friends	family member	family member	family member	friends	family member	family member
670	2015/3/28 14:37:14	144seconds	202.114.39.187(湖北-武汉)	Recommender System	femaile	<=30	notComputer	none	none	none	none	none	none	none	friends┋family member	none	none	friends┋family member	family member┋strangers┋friends	family member┋friends	friends┋family member	family member┋friends	none	friends┋family member┋strangers	friends┋family member┋strangers	friends┋family member	family member	friends┋family member┋strangers	none	none	none	friends	friends┋family member	family member┋friends	friends	none	family member
672	2015/3/28 15:13:15	83seconds	117.136.23.171(湖北-武汉)	Mobile Phone	femaile	<=30	notComputer	none	family member	family member	family member	family member	family member	none	friends┋family member	family member┋friends	family member	friends┋family member	family member┋friends	family member	none	none	family member	friends┋family member	family member┋friends	friends┋family member	none	friends┋family member	family member┋friends	friends┋family member	none	none	friends┋family member	family member┋friends	family member	none	none
673	2015/3/28 16:33:56	112seconds	223.104.3.146(北京-北京)	WeChat	male	<=30	notComputer	family member	friends	friends┋family member	friends	friends	friends	friends	strangers	friends	family member	friends	friends	friends	friends	friends	strangers┋friends	strangers	strangers	friends	strangers	friends	friends	friends	strangers	friends	friends	strangers	strangers	strangers	strangers
674	2015/3/28 16:38:07	111seconds	36.60.23.253(安徽-合肥)	WeChat	male	<=30	notComputer	friends┋family member	family member┋friends	friends┋family member	family member┋friends	friends┋family member	none	none	friends┋family member┋strangers	none	none	friends┋family member	family member┋friends	friends┋family member	family member┋friends	family member	friends┋family member┋strangers	friends┋family member	family member┋friends	family member	none	friends┋family member	family member┋friends	friends┋family member	family member	friends┋family member	family member┋strangers┋friends	family member┋friends	none	none	none
675	2015/3/28 16:58:14	99seconds	1.207.240.114(贵州-铜仁)	Recommender System	femaile	<=30	notComputer	family member	friends┋family member┋strangers	none	friends	none	none	none	friends┋family member┋strangers	friends	none	friends┋family member	family member┋friends	family member	family member	family member	family member	family member	friends┋family member	family member	none	friends┋family member	family member	family member	family member	family member	friends┋family member	family member┋friends	friends	none	family member
676	2015/3/28 17:02:03	129seconds	180.117.15.188(江苏-苏州)	Mobile Phone	male	<=30	notComputer	none	friends┋family member┋strangers	none	none	none	none	friends┋family member	family member┋friends	friends┋family member	friends	friends┋family member	family member┋friends	friends┋family member	family member┋friends	friends┋family member	family member┋friends	friends	friends	friends	none	none	friends	none	friends┋family member	family member┋friends	friends┋family member	family member┋friends	friends┋family member	family member┋friends	family member
677	2015/3/28 17:05:52	152seconds	223.104.13.156(河北-石家庄)	Mobile Phone	male	<=30	notComputer	friends┋family member	family member┋strangers┋friends	none	friends┋family member	none	none	none	friends┋family member┋strangers	friends┋family member┋strangers	friends┋family member┋strangers	friends┋family member┋strangers	friends┋family member┋strangers	family member	friends┋family member	family member	none	friends┋family member	family member┋strangers┋friends	family member┋strangers┋friends	family member	friends┋family member	family member	family member	friends┋family member	family member┋friends	friends┋family member┋strangers	family member	none	friends┋family member	family member
678	2015/3/28 18:26:03	153seconds	218.4.189.22(江苏-苏州)	Recommender System	femaile	<=30	notComputer	family member	family member	none	friends	none	none	family member	family member	friends	friends	friends	friends	friends	friends	family member	friends	friends	friends	friends	none	friends	friends┋family member	family member┋friends	friends┋family member	friends	friends┋family member	family member┋friends	none	friends┋family member	none
679	2015/3/28 18:56:37	119seconds	122.142.77.202(吉林-四平)	Recommender System	femaile	<=30	notComputer	friends┋family member	friends	none	friends┋family member	friends	none	none	friends┋family member	none	none	friends┋family member	family member┋friends	friends┋family member	family member	family member	none	family member	family member	friends┋family member	family member	family member	family member	family member	family member	family member	none	none	none	none	family member
681	2015/3/28 19:30:28	88seconds	182.18.108.32(北京-北京)	Recommender System	male	<=30	notComputer	friends┋family member	family member┋friends	friends┋family member	family member┋friends	none	none	friends┋family member	family member┋friends	friends┋family member	family member┋friends	friends┋family member	family member┋friends	friends┋family member	family member┋friends	family member	friends┋family member	family member┋friends	friends┋family member	family member	family member	family member	family member	family member	family member	family member	family member	family member	family member	family member	family member
682	2015/3/28 19:30:36	101seconds	222.173.220.227(山东-烟台)	Recommender System	male	<=30	notComputer	friends┋family member	family member┋friends	family member	friends┋family member┋strangers	friends┋family member	none	family member	friends┋family member	family member┋strangers┋friends	family member┋friends	friends┋family member┋strangers	friends┋family member	family member┋friends	friends┋family member	family member	friends┋family member┋strangers	friends┋family member	family member┋friends	friends┋family member	family member	family member	family member	friends	strangers	friends┋family member	family member┋strangers┋friends	family member┋friends	strangers┋family member	none	none
683	2015/3/28 19:46:19	74seconds	118.81.174.52(山西-太原)	Recommender System	male	<=30	notComputer	friends	friends	friends	friends	friends	none	none	friends	friends	none	friends	friends	friends	friends	friends	friends	friends	friends	family member	friends	friends	friends	friends	friends	friends	friends┋family member	friends	none	none	none
684	2015/3/28 20:31:54	53seconds	219.226.91.229(山西-太原)	Mobile Phone	male	<=30	Computer	friends	friends	strangers	strangers	friends	strangers	friends	friends	friends	friends	friends	friends	friends	friends	friends	strangers	strangers	friends	friends	strangers	friends	strangers	friends	strangers	friends	friends	strangers	strangers	strangers	strangers
685	2015/3/28 20:43:39	163seconds	42.58.59.227(辽宁-沈阳)	Recommender System	femaile	<=30	notComputer	none	none	none	none	none	none	none	none	none	none	friends	friends	friends	friends	family member	none	friends	strangers	none	none	strangers	friends	none	none	none	none	none	none	none	none
686	2015/3/28 20:50:30	113seconds	117.173.0.13(四川-绵阳)	Recommender System	femaile	<=30	notComputer	none	friends┋family member┋strangers	none	friends┋family member	family member┋friends	friends┋family member	none	friends┋family member	family member┋friends	friends┋family member	family member┋friends	friends┋family member	family member┋friends	friends┋family member	family member	family member	friends┋family member	family member┋friends	friends┋family member	none	friends┋family member	family member┋friends	friends┋family member	family member	friends┋family member	family member┋friends	friends┋family member	family member┋friends	none	none
687	2015/3/28 21:02:45	102seconds	222.36.56.5(天津-天津)	Recommender System	femaile	<=30	notComputer	none	none	none	none	friends	friends	friends	friends	none	friends	strangers	friends┋family member┋strangers	friends┋family member	family member	friends┋family member	family member┋friends	friends┋family member┋strangers	friends┋family member┋strangers	friends┋family member┋strangers	friends┋family member	family member┋friends	friends┋family member	family member┋friends	friends┋family member	family member┋friends	friends┋family member	family member┋friends	friends┋family member	family member┋friends	friends┋family member
688	2015/3/28 22:19:19	102seconds	118.81.82.255(山西-太原)	Mobile Phone	male	<=30	notComputer	family member	family member	family member	friends	family member	strangers	friends	friends	family member	strangers	friends	friends	none	none	friends	none	friends	strangers	friends	friends	friends	strangers	strangers	strangers	strangers	strangers	friends	friends	friends	friends
689	2015/3/28 23:03:35	149seconds	222.212.86.149(四川-成都)	Mobile Phone	male	<=30	notComputer	friends┋family member	family member┋friends	none	none	none	none	friends┋family member	family member┋friends	none	none	friends┋family member	family member┋friends	friends┋family member	family member┋friends	friends┋family member	family member┋friends	friends┋family member	family member┋friends	friends┋family member	none	friends┋family member	family member┋friends	friends┋family member	family member┋friends	friends┋family member	family member┋friends	friends┋family member	none	none	none
690	2015/3/29 0:17:15	128seconds	10.41.212.87(未知-未知)	Mobile Phone	femaile	<=30	notComputer	none	none	none	none	none	none	none	none	none	none	friends┋family member┋strangers	friends┋family member	family member┋friends	friends┋family member	family member	none	friends┋family member	family member┋friends	friends┋family member	family member	friends┋family member	family member	friends┋family member	family member┋friends	friends┋family member	family member	family member	none	none	none
691	2015/3/29 0:39:47	50seconds	110.177.89.163(山西-太原)	Recommender System	male	<=30	notComputer	none	none	none	none	none	none	none	none	none	none	none	none	none	none	none	none	none	none	none	none	none	none	none	none	none	none	none	none	none	none
692	2015/3/29 0:58:02	67seconds	36.35.34.186(安徽-合肥)	Mobile Phone	male	<=30	notComputer	friends	family member	friends	strangers┋friends	family member	friends┋family member	family member┋friends	friends┋family member	friends	family member	friends	family member	friends	family member	friends	family member	family member	friends	friends	friends	friends	friends	friends	friends	friends	friends	friends┋family member	friends	friends	family member
695	2015/3/29 2:31:27	422seconds	140.206.88.86(上海-上海)	Mobile Phone	male	<=30	notComputer	friends	friends	friends	friends	friends	friends	friends	friends	friends	friends	friends	friends	friends	friends	family member	friends	friends	friends	friends	none	friends	friends	friends	none	friends	friends	friends	none	none	family member
696	2015/3/29 6:22:44	171seconds	218.30.101.47(北京-北京)	Mobile Phone	femaile	<=30	notComputer	friends┋family member┋strangers	friends┋family member┋strangers	none	friends┋family member	family member┋friends	none	friends┋family member	family member┋friends	friends┋family member	family member┋friends	friends┋family member	family member┋friends	friends┋family member	family member┋friends	none	friends┋family member	family member┋friends	friends┋family member	family member┋friends	none	none	none	friends┋family member	none	friends┋family member	family member┋friends	friends┋family member	family member┋friends	none	none
697	2015/3/29 6:26:36	107seconds	112.96.130.80(广东-广州)	Mobile Phone	male	<=30	notComputer	friends┋family member┋strangers	friends┋family member	family member	friends┋family member	family member┋friends	none	none	friends┋family member	none	none	friends┋family member	family member┋friends	friends┋family member	family member┋friends	none	none	friends┋family member	family member┋friends	friends┋family member	none	none	none	none	none	none	friends┋family member	family member┋friends	none	none	none
698	2015/3/29 6:41:15	146seconds	36.40.72.188(陕西-西安)	Mobile Phone	male	<=30	notComputer	friends┋family member	family member┋friends	friends┋family member	none	none	none	none	none	none	none	friends┋family member	family member┋friends	friends┋family member	family member┋friends	friends┋family member	none	friends┋family member	family member┋friends	friends┋family member	family member	none	family member	family member	family member	friends┋family member	none	none	none	none	none
699	2015/3/29 7:00:49	221seconds	122.136.106.168(吉林-延边)	Recommender System	femaile	>30	notComputer	family member	family member	friends┋family member	none	none	friends┋family member	none	none	none	none	none	none	none	none	none	none	none	none	none	none	none	none	none	family member	none	friends┋family member	none	none	family member	none
700	2015/3/29 7:11:08	139seconds	111.36.224.227(山东-临沂)	Mobile Phone	male	<=30	notComputer	friends┋family member	family member	none	friends┋family member┋strangers	friends┋family member	none	none	friends┋family member	family member┋friends	none	friends┋family member	family member┋friends	friends┋family member	family member┋friends	friends┋family member	family member┋friends	friends┋family member	family member┋friends	friends┋family member	family member	friends┋family member	family member┋friends	none	none	friends┋family member	family member┋friends	friends┋family member	none	none	none
702	2015/3/29 7:51:19	245seconds	60.164.127.234(甘肃-张掖)	Mobile Phone	femaile	<=30	notComputer	strangers┋friends	family member┋strangers┋friends	none	friends┋family member	family member┋friends	none	friends┋family member┋strangers	friends┋family member┋strangers	friends┋family member┋strangers	friends┋family member┋strangers	friends┋family member┋strangers	friends	strangers	friends┋family member	family member┋strangers	friends┋family member┋strangers	family member	friends┋family member┋strangers	none	family member	friends┋family member┋strangers	friends┋family member┋strangers	friends┋family member┋strangers	none	family member	friends┋family member┋strangers	friends┋family member┋strangers	family member	none	none
703	2015/3/29 8:03:15	379seconds	121.248.29.246(江苏-南京)	Mobile Phone	male	<=30	notComputer	friends┋family member	family member┋friends	none	friends┋family member	family member┋friends	none	none	friends┋family member	family member┋friends	friends┋family member	strangers	strangers	none	friends┋family member	family member	friends┋family member	family member┋friends	friends┋family member	family member┋friends	none	none	none	friends┋family member	family member	none	family member	friends	none	none	family member
704	2015/3/29 8:20:17	82seconds	112.65.57.106(上海-上海)	Recommender System	male	<=30	Computer	family member	friends	strangers	strangers	friends	friends	family member	family member	friends	friends	strangers	strangers	friends	friends	strangers	friends	friends	strangers	family member	family member	strangers	family member	strangers	friends	strangers	none	family member	strangers	strangers	friends
705	2015/3/29 8:25:24	170seconds	14.219.208.115(广东-东莞)	Recommender System	male	>30	notComputer	none	friends┋family member┋strangers	friends┋family member┋strangers	none	none	none	none	none	none	none	none	none	none	friends┋family member	none	none	friends┋family member	family member┋friends	friends┋family member	none	none	none	none	none	none	friends┋family member┋strangers	none	none	none	none
707	2015/3/29 9:08:38	109seconds	1.194.187.34(河南-开封)	Recommender System	male	>30	notComputer	none	none	none	none	none	none	none	family member	none	family member	friends┋family member┋strangers	friends┋family member	family member┋friends	friends┋family member┋strangers	family member	friends┋family member	family member┋friends	friends┋family member┋strangers	friends┋family member┋strangers	family member	friends┋family member┋strangers	family member	family member	family member	family member	family member	family member	family member	family member	family member
708	2015/3/29 9:32:18	119seconds	202.98.152.244(四川-德阳)	WeChat	femaile	<=30	notComputer	none	none	none	none	none	none	none	none	none	none	none	none	none	none	none	none	friends┋family member	family member┋friends	none	none	none	none	family member	friends┋family member	family member┋friends	none	none	none	none	none
709	2015/3/29 9:33:33	94seconds	117.89.109.215(江苏-南京)	Mobile Phone	male	<=30	notComputer	friends	none	none	none	none	none	none	friends	none	none	friends	friends	friends	friends	friends	none	friends	friends	none	none	none	none	none	none	none	none	none	none	none	none
710	2015/3/29 9:38:15	178seconds	101.107.23.24(河南-郑州)	Recommender System	femaile	>30	notComputer	none	none	family member	friends┋family member	none	friends	none	none	friends	friends	friends	friends	friends	friends	none	none	friends	friends	friends	none	none	none	none	none	none	none	none	none	none	none
712	2015/3/29 10:10:10	78seconds	122.192.211.223(江苏-徐州)	WeChat	male	<=30	Computer	friends┋family member	friends	friends┋family member	friends	friends	none	none	strangers	strangers	none	none	none	none	none	none	friends	friends┋family member	family member┋friends	friends	none	none	none	none	none	none	friends	friends	none	none	none
713	2015/3/29 10:16:19	107seconds	61.180.200.244(黑龙江-齐齐哈尔)	Recommender System	femaile	<=30	Computer	friends┋family member	family member┋strangers┋friends	family member┋friends	friends┋family member	family member┋friends	none	none	none	none	none	friends┋family member	family member┋friends	friends┋family member	family member┋friends	friends┋family member	family member┋friends	friends┋family member	family member┋friends	friends┋family member	none	none	none	none	none	none	none	friends┋family member┋strangers	none	none	none
714	2015/3/29 10:27:06	114seconds	218.6.135.168(四川-雅安)	Recommender System	femaile	<=30	notComputer	family member	friends	none	family member	friends	none	none	none	family member	none	family member	friends	none	friends	none	strangers	strangers	strangers	strangers	none	strangers	none	strangers	none	strangers	strangers	none	none	none	none
715	2015/3/29 11:00:10	129seconds	106.39.19.237(北京-北京)	Recommender System	femaile	<=30	notComputer	friends┋family member	family member┋friends	friends┋family member	family member┋friends	friends	friends	friends	friends	friends	friends	friends	friends	friends	friends	friends┋family member	friends	friends┋family member	friends	friends	none	friends	friends	friends	friends┋family member	family member┋friends	friends	friends	friends	friends	none
716	2015/3/29 11:09:53	125seconds	171.34.111.122(江西-南昌)	Mobile Phone	male	<=30	notComputer	friends┋family member	family member┋friends	friends┋family member	family member┋friends	friends┋family member	family member┋friends	friends┋family member	family member┋friends	friends┋family member	family member┋friends	friends┋family member	family member┋friends	friends┋family member	family member┋friends	friends┋family member	family member┋friends	friends┋family member	family member┋friends	friends┋family member	family member┋friends	friends┋family member	family member┋friends	friends┋family member	family member┋friends	friends┋family member	family member┋friends	friends┋family member	family member┋friends	friends┋family member	family member┋friends
717	2015/3/29 11:24:44	70seconds	171.34.111.122(江西-南昌)	Mobile Phone	male	<=30	notComputer	strangers┋family member	friends	family member	friends	strangers	friends	family member	friends	strangers	friends	friends	friends	family member	friends	friends	family member	friends	friends	family member	friends	family member	strangers┋friends	friends	family member	friends	friends	family member	friends	family member	friends
718	2015/3/29 11:34:02	26seconds	123.163.18.36(河南-洛阳)	Recommender System	male	<=30	notComputer	family member	family member	family member	family member	family member	family member	family member	family member	family member	family member	family member	family member	family member	family member	family member	family member	family member	family member	family member	family member	family member	family member	family member	family member	family member	family member	family member	family member	family member	family member
720	2015/3/29 12:07:04	126seconds	210.51.42.154(上海-上海)	Recommender System	femaile	<=30	notComputer	friends	friends	friends	friends	friends	friends	friends	friends	friends	friends	family member	friends	friends	friends	friends	friends	friends	friends	friends	none	none	none	friends	friends	friends	friends┋family member	family member	family member	none	none
721	2015/3/29 12:23:00	131seconds	110.97.68.200(河北-邯郸)	Recommender System	male	<=30	notComputer	family member	friends┋family member	none	friends┋family member	family member┋strangers┋friends	none	none	friends┋family member┋strangers	friends┋family member	family member┋strangers┋friends	family member┋strangers┋friends	family member┋friends	friends┋family member	family member┋friends	family member	friends┋family member	family member┋friends	friends┋family member	family member┋friends	family member	friends┋family member┋strangers	friends┋family member	family member┋friends	family member	family member	friends┋family member┋strangers	friends┋family member┋strangers	family member	none	family member
722	2015/3/29 12:53:06	168seconds	117.136.2.69(河北-石家庄)	Mobile Phone	femaile	<=30	notComputer	family member	friends┋family member	family member┋friends	friends	strangers┋friends	friends┋strangers	friends┋family member	family member┋strangers┋friends	family member┋friends	friends┋family member┋strangers	friends┋family member	family member┋friends	friends┋family member	family member┋friends	friends┋family member	family member┋strangers┋friends	family member┋friends	friends┋family member┋strangers	friends┋family member	family member┋friends	friends┋family member	family member┋friends	friends┋family member┋strangers	friends┋family member	family member┋strangers┋friends	family member┋strangers┋friends	family member┋strangers┋friends	family member┋friends	friends┋family member	family member
723	2015/3/29 12:54:06	157seconds	182.91.38.97(广西-桂林)	Mobile Phone	femaile	<=30	notComputer	family member	none	friends	none	none	strangers	none	strangers	strangers	strangers	strangers	strangers	strangers	strangers	strangers	strangers┋friends	friends┋strangers	strangers┋friends	friends┋strangers	friends	friends	friends	friends	friends	friends	friends	friends	friends	friends	friends
724	2015/3/29 13:16:32	141seconds	118.186.158.231(北京-北京)	Mobile Phone	femaile	<=30	notComputer	none	friends┋family member┋strangers	none	friends┋family member	family member┋friends	none	none	none	friends	friends┋family member	family member┋strangers┋friends	none	none	friends┋family member	none	friends┋family member┋strangers	friends┋family member	family member┋strangers┋friends	family member┋strangers┋friends	none	friends┋family member┋strangers	friends┋family member	family member┋friends	none	friends┋family member	family member┋strangers┋friends	family member┋friends	none	none	none
727	2015/3/29 13:39:47	132seconds	113.240.238.212(湖南-长沙)	Recommender System	male	<=30	notComputer	friends┋family member	family member┋friends	friends┋family member	family member	family member	family member	family member	friends┋family member	family member┋friends	friends┋family member	family member	family member	family member	family member	family member	family member	family member	family member	family member	family member	family member	family member	family member	family member	family member	family member	family member	family member	family member	none
728	2015/3/29 13:41:25	52seconds	113.240.238.212(湖南-长沙)	Recommender System	male	<=30	notComputer	friends┋family member	family member	family member	family member	family member	friends┋family member	family member	family member	friends┋family member	family member	family member	family member	family member	family member	none	family member	family member	family member	none	family member	family member	family member	family member	family member	family member	family member	family member	family member	family member	none
729	2015/3/29 13:48:44	133seconds	115.103.131.181(北京-北京)	Recommender System	femaile	<=30	notComputer	friends┋family member	family member┋strangers┋friends	family member┋friends	friends	friends┋family member	none	none	friends┋family member	none	friends┋family member	family member┋friends	friends┋family member	family member┋friends	family member	family member	friends	friends┋family member	family member┋friends	friends┋family member	none	friends┋family member	none	friends	none	none	friends	friends	none	none	none
730	2015/3/29 13:52:27	97seconds	115.103.131.181(北京-北京)	Recommender System	femaile	<=30	notComputer	friends┋family member	family member┋friends	family member	friends	friends┋family member	none	none	friends┋family member	friends	friends┋family member	family member┋friends	friends┋family member	family member┋friends	family member	none	friends┋family member	family member	friends┋family member	family member┋friends	none	friends┋family member	none	friends	none	none	friends┋family member	family member┋friends	friends	none	none
731	2015/3/29 15:01:19	108seconds	222.197.71.227(四川-成都)	Recommender System	femaile	<=30	notComputer	friends┋family member	none	none	none	none	none	none	none	none	none	none	friends┋family member	family member┋friends	none	none	none	none	none	none	none	none	none	none	none	none	none	none	none	none	none
732	2015/3/29 15:57:41	86seconds	119.49.6.45(吉林-吉林)	Recommender System	male	<=30	notComputer	friends	family member	friends	friends	strangers	none	none	friends	friends	friends	none	friends	friends	friends	family member	friends	friends	friends	friends	none	none	none	none	none	family member	none	none	none	none	none
734	2015/3/29 16:42:59	221seconds	115.155.89.31(甘肃-兰州)	Recommender System	male	<=30	notComputer	friends┋family member	family member┋friends	friends┋family member	family member┋friends	friends┋family member	none	family member	friends┋family member	family member┋friends	friends┋family member	family member┋friends	friends┋family member	family member┋friends	friends┋family member	family member	none	friends┋family member	family member┋friends	friends┋family member	family member	family member	family member	family member	family member	friends┋family member	family member┋friends	friends┋family member	family member	none	family member
735	2015/3/29 16:49:30	279seconds	58.20.50.135(湖南-长沙)	Recommender System	male	<=30	Computer	none	family member	friends┋family member	none	none	none	none	family member	none	none	friends┋family member	family member	family member	family member	none	friends┋family member┋strangers	friends┋family member	family member┋friends	none	none	family member	family member	family member	none	family member	friends┋family member	family member┋friends	none	none	none
736	2015/3/29 17:30:52	148seconds	61.184.146.3(湖北-孝感)	Recommender System	male	<=30	notComputer	none	none	friends	none	friends┋family member	none	none	none	none	none	friends	friends	none	friends┋family member	none	none	none	friends┋family member	family member	none	strangers┋friends	family member┋friends	none	none	friends┋family member	friends	friends┋family member	friends	none	none
737	2015/3/29 18:28:09	113seconds	218.94.124.44(江苏-南京)	Recommender System	femaile	<=30	notComputer	family member	family member	family member	family member	none	none	none	friends┋family member	none	none	family member	family member	family member	family member	family member	family member	family member	family member	family member	family member	family member	family member	none	none	none	none	none	none	none	none
738	2015/3/29 18:39:45	37seconds	59.172.176.197(湖北-武汉)	Poster Link	femaile	>30	notComputer	family member	friends	friends	friends	friends	family member	family member	friends	friends	friends	friends	family member	family member	family member	family member	family member	family member	family member	family member	friends	friends	friends	friends	friends	friends	family member	friends	friends	friends	friends
739	2015/3/29 20:07:53	154seconds	112.36.226.202(山东-济南)	Mobile Phone	male	<=30	notComputer	friends	family member	none	strangers	none	none	none	friends┋family member	friends	friends	none	friends┋family member	family member┋friends	friends┋family member	family member	friends┋family member	family member┋friends	friends┋family member	family member┋friends	family member	friends┋family member┋strangers	friends┋family member	family member┋friends	family member	friends	friends	friends	family member	family member	family member
741	2015/3/29 22:04:13	132seconds	218.199.207.63(湖北-武汉)	Recommender System	male	<=30	notComputer	family member	none	family member	none	none	none	none	friends┋family member┋strangers	none	none	none	friends┋family member	family member	none	friends┋family member	none	friends┋family member	family member┋strangers┋friends	family member	none	none	none	none	friends┋family member	none	none	none	none	none	none
743	2015/3/29 23:56:21	169seconds	10.19.186.126(未知-未知)	Mobile Phone	femaile	<=30	notComputer	none	friends┋family member	friends	friends┋family member	family member┋friends	none	friends┋family member	none	none	none	friends┋family member┋strangers	friends┋family member	none	friends┋family member	family member┋friends	friends┋family member	family member┋friends	friends┋family member	family member┋friends	family member	none	none	none	family member	friends	none	none	family member	none	family member
744	2015/3/30 0:04:31	170seconds	59.48.247.122(山西-吕梁)	Mobile Phone	femaile	<=30	notComputer	friends┋family member	none	none	family member	family member	none	none	friends┋family member	family member	friends┋family member	family member┋friends	friends┋family member	family member┋friends	friends┋family member	family member	none	friends┋family member┋strangers	friends┋family member	family member┋friends	family member	friends┋family member┋strangers	friends┋family member	none	family member	family member	friends┋family member	family member┋friends	none	none	family member
746	2015/3/30 0:34:17	82seconds	119.103.177.57(湖北-武汉)	Mobile Phone	male	<=30	notComputer	family member	family member	family member	family member	family member	none	none	family member	none	none	family member	family member	family member	family member	family member	family member	family member	family member	family member	none	family member	family member	family member	family member	family member	family member	family member	none	none	none
747	2015/3/30 0:36:07	130seconds	111.37.5.202(山东-临沂)	Mobile Phone	femaile	<=30	notComputer	none	friends┋family member	none	friends┋family member	family member┋friends	friends┋family member	family member┋friends	friends┋family member	family member┋friends	friends┋family member	family member┋friends	friends┋family member	family member┋friends	friends┋family member	family member┋friends	friends┋family member	family member┋friends	friends┋family member	family member┋friends	friends┋family member	family member┋friends	friends┋family member	family member┋friends	friends┋family member	family member┋friends	friends┋family member	family member┋friends	friends┋family member	none	none
748	2015/3/30 0:50:24	144seconds	117.172.27.220(四川-成都)	Mobile Phone	male	>30	notComputer	family member	family member	family member	family member	family member	family member	family member	friends┋family member	family member	family member	friends┋family member┋strangers	friends┋family member	family member┋friends	friends┋family member┋strangers	family member	family member	friends┋family member	family member┋strangers┋friends	family member┋strangers┋friends	family member	friends┋family member┋strangers	family member	family member	family member	family member	friends┋family member	family member┋strangers┋friends	family member	family member	family member
749	2015/3/30 0:57:36	37seconds	114.116.100.69(广东-深圳)	Mobile Phone	male	<=30	notComputer	family member	family member	family member	family member	family member	family member	family member	family member	family member	family member	family member	family member	family member	family member	family member	family member	family member	family member	family member	family member	family member	family member	family member	family member	family member	family member	family member	family member	family member	family member
750	2015/3/30 0:57:40	64seconds	117.136.84.76(未知-未知)	Mobile Phone	male	<=30	notComputer	family member	family member	family member	family member	family member	family member	family member	family member	family member	family member	friends	family member	family member	family member	family member	family member	family member	family member	family member	family member	family member	family member	family member	family member	family member	family member	family member	family member	family member	family member
751	2015/3/30 0:58:02	234seconds	111.200.134.19(北京-北京)	Mobile Phone	male	<=30	notComputer	friends┋family member	family member┋friends	friends┋family member	friends	none	none	none	friends┋family member┋strangers	none	none	friends┋family member	family member┋friends	friends┋family member	family member	family member	none	family member	friends┋family member┋strangers	friends┋family member	none	friends┋family member	family member┋friends	friends┋family member	family member	family member	none	none	none	none	none
753	2015/3/30 1:01:02	181seconds	58.20.53.5(湖南-长沙)	Mobile Phone	male	<=30	notComputer	friends┋family member┋strangers	none	none	strangers┋friends	friends┋strangers	strangers┋friends	none	friends┋family member┋strangers	friends┋family member┋strangers	strangers┋friends	family member┋strangers┋friends	family member┋friends	friends┋family member	family member┋strangers┋friends	family member┋friends	strangers┋friends	family member┋strangers┋friends	family member┋strangers┋friends	family member┋strangers┋friends	family member	friends┋family member┋strangers	friends┋family member	family member┋strangers┋friends	family member	strangers┋family member	family member┋strangers┋friends	family member┋strangers┋friends	family member┋friends	friends┋family member┋strangers	family member
754	2015/3/30 1:02:14	239seconds	117.146.116.11(新疆-乌鲁木齐)	Mobile Phone	male	<=30	notComputer	none	none	none	friends┋family member┋strangers	none	none	none	none	friends┋family member┋strangers	none	friends┋family member	family member┋friends	friends┋family member	family member┋friends	none	none	friends┋family member	family member┋friends	friends┋family member┋strangers	none	friends┋family member┋strangers	friends┋family member	none	none	none	none	none	none	none	none
755	2015/3/30 1:02:22	84seconds	59.61.187.203(福建-福州)	Mobile Phone	male	<=30	Computer	none	none	none	none	none	none	none	friends┋family member	none	none	friends┋family member	none	none	none	none	none	friends┋family member	family member┋friends	none	none	friends┋family member┋strangers	none	none	none	none	none	none	none	none	none
756	2015/3/30 1:03:42	139seconds	101.27.247.135(河北-保定)	Mobile Phone	male	<=30	notComputer	friends┋family member	family member┋friends	none	friends┋family member	family member┋friends	friends┋family member	family member┋friends	friends┋family member┋strangers	friends	friends┋family member┋strangers	friends┋family member	family member┋friends	friends┋family member	family member┋friends	family member	friends┋family member	family member┋friends	friends┋family member┋strangers	friends┋family member	family member	friends┋family member	family member┋friends	friends┋family member	family member┋friends	friends┋family member	family member┋friends	friends┋family member	family member┋friends	friends┋family member	family member
757	2015/3/30 1:05:47	233seconds	58.135.67.98(北京-北京)	Mobile Phone	male	<=30	notComputer	friends	friends	none	none	friends	friends	friends	friends	friends	friends	friends┋family member┋strangers	friends┋family member┋strangers	friends┋family member┋strangers	friends┋family member	family member┋friends	friends┋family member┋strangers	friends┋family member┋strangers	friends┋family member┋strangers	friends┋family member┋strangers	friends┋family member	family member┋strangers┋friends	family member┋strangers┋friends	family member┋strangers┋friends	family member┋friends	friends┋family member	family member┋strangers┋friends	family member┋strangers┋friends	family member┋friends	family member	family member
758	2015/3/30 1:08:51	114seconds	111.20.240.139(陕西-汉中)	Mobile Phone	male	<=30	notComputer	none	none	none	none	none	none	none	none	none	none	none	none	none	none	none	none	none	none	none	none	none	none	none	none	none	none	none	none	none	none
759	2015/3/30 1:10:35	166seconds	183.221.14.85(四川-成都)	Mobile Phone	male	<=30	notComputer	friends┋family member	family member┋friends	friends┋family member	family member┋friends	friends┋family member	family member┋friends	friends┋family member	family member┋friends	friends┋family member	family member┋friends	friends┋family member	family member┋friends	friends┋family member	family member┋friends	friends┋family member	family member┋strangers┋friends	family member┋friends	friends┋family member┋strangers	friends┋family member	family member	friends┋family member	family member┋friends	friends┋family member	family member┋friends	friends┋family member	family member┋strangers┋friends	family member┋friends	friends┋family member	none	family member
761	2015/3/30 1:42:51	369seconds	123.152.245.103(浙江-宁波)	Mobile Phone	male	<=30	notComputer	friends┋family member	family member┋friends	none	friends┋family member	family member┋strangers┋friends	none	family member	friends┋family member┋strangers	none	none	friends┋family member┋strangers	friends┋family member	family member┋friends	friends┋family member	family member	none	friends┋family member	family member┋friends	friends┋family member┋strangers	family member	friends┋family member┋strangers	friends┋family member	none	family member	friends┋family member	family member┋strangers┋friends	family member┋strangers┋friends	family member	none	family member
762	2015/3/30 2:18:03	146seconds	117.136.14.41(广西-玉林)	Mobile Phone	femaile	<=30	notComputer	none	friends	family member	family member	none	strangers	none	none	none	none	family member	family member	family member	family member	strangers	friends	friends	family member	friends	friends	friends	family member	friends	friends	strangers	strangers	friends	friends	strangers	friends
763	2015/3/30 4:46:47	155seconds	221.213.17.17(云南-昆明)	Mobile Phone	male	>30	notComputer	none	none	none	none	friends	none	none	friends	none	none	family member	friends	friends	friends	family member	none	friends	friends	none	none	friends	friends	none	none	friends	friends┋family member	strangers	none	none	none
764	2015/3/30 5:56:31	227seconds	123.150.159.133(天津-天津)	Mobile Phone	male	<=30	notComputer	family member	family member	family member	friends┋family member	family member┋friends	family member	family member	friends┋family member┋strangers	friends┋family member	family member	friends┋family member┋strangers	friends┋family member┋strangers	friends┋family member┋strangers	friends┋family member	family member┋friends	friends┋family member	family member┋friends	friends┋family member┋strangers	friends┋family member┋strangers	friends┋family member	family member┋strangers┋friends	family member┋strangers┋friends	family member┋strangers┋friends	family member┋friends	friends┋family member	family member┋strangers┋friends	family member┋strangers┋friends	family member	family member	family member
767	2015/3/30 6:23:50	137seconds	121.237.99.1(江苏-南京)	Mobile Phone	male	<=30	notComputer	friends┋family member	family member┋friends	none	friends┋family member	family member┋friends	friends┋family member	family member┋friends	friends┋family member	family member┋friends	friends┋family member	friends	friends┋family member	family member┋friends	friends┋family member	family member┋friends	friends┋family member	family member┋friends	friends	friends┋family member	family member┋friends	friends┋family member	family member┋friends	friends┋family member	family member┋friends	friends┋family member	family member┋friends	friends┋family member	family member┋friends	friends┋family member	family member┋friends
768	2015/3/30 6:28:19	92seconds	39.64.87.56(山东-济南)	Mobile Phone	male	<=30	notComputer	family member	family member	family member	family member	family member	friends	friends	family member	family member	family member	family member	strangers	friends	strangers	friends	friends	friends	strangers	friends	family member	friends	family member	friends	friends	family member	friends	friends┋family member	family member	friends┋family member	friends
771	2015/3/30 6:35:17	106seconds	115.44.146.190(广东-深圳)	Mobile Phone	femaile	>30	notComputer	friends	none	friends┋family member	none	none	none	none	friends	none	none	none	friends	friends	friends	none	friends┋family member┋strangers	none	friends	none	none	none	none	none	none	friends┋family member┋strangers	strangers┋friends	none	none	none	none
772	2015/3/30 6:39:24	84seconds	42.225.188.236(河南-平顶山)	Mobile Phone	femaile	<=30	notComputer	friends┋family member	friends┋strangers	strangers┋friends	strangers	strangers┋friends	friends┋strangers	strangers┋friends	family member┋friends	friends	strangers	friends	strangers	strangers	friends	strangers	friends	friends┋family member	friends	friends	strangers┋friends	strangers	friends	strangers┋friends	friends┋strangers	strangers┋friends	friends┋strangers	strangers┋friends	friends┋strangers	strangers┋friends	friends┋strangers
773	2015/3/30 6:45:28	81seconds	175.164.52.47(辽宁-沈阳)	Mobile Phone	male	<=30	notComputer	none	none	none	none	none	none	none	none	none	none	none	none	none	none	none	none	none	none	none	none	none	none	none	none	none	none	none	none	none	none
775	2015/3/30 6:53:55	162seconds	10.73.15.94(未知-未知)	Mobile Phone	male	<=30	notComputer	none	none	family member	none	friends	none	none	friends	none	none	none	none	none	none	none	friends	none	friends	none	none	none	none	none	none	none	friends	friends	none	none	none
776	2015/3/30 6:55:18	113seconds	122.97.214.7(江苏-南京)	Mobile Phone	male	>30	notComputer	family member	family member	none	none	none	none	none	none	none	none	none	none	family member	none	none	none	none	none	none	none	none	none	none	none	none	none	none	none	none	none
777	2015/3/30 6:57:28	154seconds	125.76.5.38(甘肃-嘉峪关)	Mobile Phone	male	>30	notComputer	none	none	none	none	none	none	none	none	none	none	none	none	none	none	none	none	none	none	none	none	none	none	none	none	none	none	none	none	none	none
778	2015/3/30 6:58:23	41seconds	125.76.5.38(甘肃-嘉峪关)	Mobile Phone	male	>30	notComputer	none	none	none	none	none	none	none	none	none	none	none	none	none	none	none	none	none	none	none	none	none	none	none	none	none	none	none	none	none	none
779	2015/3/30 7:03:09	234seconds	124.236.203.120(河北-石家庄)	Mobile Phone	male	<=30	notComputer	friends┋family member	family member┋friends	friends┋family member	family member┋strangers┋friends	family member┋strangers┋friends	family member┋friends	none	friends┋family member┋strangers	none	none	friends┋family member	family member┋friends	friends┋family member┋strangers	friends┋family member	family member┋friends	friends	friends┋family member	family member┋strangers┋friends	family member┋strangers┋friends	none	friends┋family member┋strangers	friends┋family member	none	friends┋family member	family member┋friends	none	friends┋family member┋strangers	none	none	none
780	2015/3/30 7:03:10	122seconds	115.168.77.68(江西-南昌)	Mobile Phone	femaile	<=30	notComputer	friends┋family member	family member┋friends	family member	none	friends┋family member	none	family member	friends┋family member	none	friends┋family member	family member┋strangers┋friends	family member┋friends	friends┋family member	family member┋friends	friends┋family member	none	friends┋family member	family member┋friends	friends┋family member	family member	friends┋family member	family member┋friends	friends┋family member	family member	friends┋family member	family member┋friends	friends┋family member	family member┋friends	friends┋family member	family member
781	2015/3/30 7:14:46	73seconds	61.138.125.8(内蒙古-包头)	Mobile Phone	male	<=30	notComputer	none	family member	friends┋family member	none	none	family member	strangers	strangers	strangers	strangers	none	none	none	none	none	none	none	none	none	none	none	none	none	none	none	none	none	none	none	none
782	2015/3/30 7:17:16	97seconds	117.136.5.109(辽宁-沈阳)	Mobile Phone	femaile	<=30	notComputer	none	none	none	none	none	none	none	none	none	none	family member	family member	family member	family member	none	none	none	none	none	none	family member	family member	family member	none	none	none	none	none	none	none
786	2015/3/30 7:43:17	155seconds	223.104.25.100(重庆-重庆)	WeChat	femaile	<=30	notComputer	friends┋family member	family member┋friends	friends┋family member	family member┋friends	friends┋family member	family member┋friends	friends┋family member	family member┋friends	friends┋family member	family member┋friends	friends┋family member	family member┋friends	friends┋family member	family member┋friends	friends┋family member	family member┋friends	friends┋family member	family member┋friends	friends┋family member	family member┋friends	friends┋family member	family member┋friends	friends┋family member	family member┋friends	friends┋family member	family member┋friends	friends┋family member	family member┋friends	friends┋family member	family member┋friends
787	2015/3/30 7:43:37	131seconds	10.17.128.223(未知-未知)	Mobile Phone	male	<=30	notComputer	friends	friends	none	none	none	none	none	friends	friends	none	friends	friends	none	none	none	none	none	friends	friends	none	none	none	none	none	none	none	none	none	none	none
788	2015/3/30 7:44:40	160seconds	202.198.55.187(吉林-长春)	Mobile Phone	male	<=30	notComputer	friends┋family member	family member┋friends	friends┋family member	family member┋friends	friends┋family member	none	none	friends┋family member	strangers	none	friends┋family member	family member┋friends	none	friends┋family member	family member	friends┋family member	family member┋friends	friends┋family member	none	family member	none	none	friends┋family member	none	friends┋family member	family member┋friends	none	none	none	family member
789	2015/3/30 7:47:49	166seconds	58.20.50.131(湖南-长沙)	Mobile Phone	femaile	<=30	notComputer	none	friends┋family member	none	friends┋family member	family member┋strangers┋friends	none	none	friends┋family member┋strangers	none	none	friends┋family member┋strangers	friends┋family member	family member┋friends	friends┋family member	family member	friends	friends┋family member	family member┋strangers┋friends	none	none	friends┋family member┋strangers	friends┋family member	friends	friends	friends┋family member┋strangers	friends	friends	friends	none	none
790	2015/3/30 7:48:36	275seconds	10.221.152.73(未知-未知)	Mobile Phone	male	<=30	notComputer	family member	friends	friends┋family member	friends	friends	friends	friends┋family member	family member┋friends	friends	friends	friends┋family member	family member┋friends	friends┋family member	family member┋friends	friends┋family member	family member┋friends	friends┋family member	family member┋friends	friends┋family member	friends	friends┋family member	family member┋friends	family member	friends┋family member	family member┋friends	friends	friends	none	none	none
791	2015/3/30 7:49:40	148seconds	222.36.244.169(天津-天津)	Mobile Phone	male	<=30	notComputer	friends	none	none	friends	friends	friends	none	friends┋family member	friends	friends	friends┋family member	family member┋friends	friends	friends┋family member	family member┋friends	friends	friends	friends	friends	none	friends┋family member┋strangers	friends	friends	none	friends┋family member	friends	friends	friends	none	none
793	2015/3/30 7:57:16	190seconds	117.136.4.29(山西-太原)	Mobile Phone	male	<=30	notComputer	friends┋family member	family member┋friends	friends	friends	friends	none	friends┋family member	family member┋strangers┋friends	family member┋strangers┋friends	family member┋strangers┋friends	family member┋friends	friends┋family member	family member┋friends	friends┋family member	family member	friends┋family member┋strangers	friends┋family member┋strangers	friends┋family member┋strangers	friends┋family member	family member	friends┋family member┋strangers	friends┋family member	family member┋friends	family member	none	none	friends┋family member	family member┋friends	none	none
794	2015/3/30 8:25:09	178seconds	122.4.212.254(山东-潍坊)	Recommender System	male	<=30	notComputer	friends	friends	friends	friends	none	none	none	friends	friends	friends	friends┋family member┋strangers	friends┋family member	family member┋friends	friends┋family member	family member┋friends	friends┋family member	family member┋strangers┋friends	family member┋strangers┋friends	family member┋strangers┋friends	family member	friends┋family member┋strangers	friends┋family member	family member┋friends	family member	friends┋family member	family member┋friends	friends┋family member	none	none	family member
795	2015/3/30 9:15:54	110seconds	125.71.200.30(四川-成都)	Recommender System	male	<=30	notComputer	none	none	friends	friends┋family member	friends	friends	friends	friends	friends	friends	friends	friends	friends	strangers	friends	strangers┋friends	friends┋strangers	strangers┋friends	friends	family member	strangers┋friends	none	strangers┋friends	friends	friends	strangers	friends	strangers	strangers	friends
796	2015/3/30 9:19:04	208seconds	116.246.2.249(上海-上海)	Recommender System	femaile	<=30	notComputer	none	none	none	friends┋family member	family member┋friends	friends	none	friends┋family member	none	none	friends┋family member	family member┋friends	family member	friends┋family member	family member	none	none	family member	family member	family member	friends┋family member	family member┋friends	friends	friends┋family member	family member┋friends	friends	friends	friends	none	none
797	2015/3/30 9:29:16	67seconds	171.34.196.26(江西-南昌)	Recommender System	male	<=30	notComputer	none	friends┋family member	family member┋friends	none	none	none	none	none	none	none	none	none	none	none	none	none	none	none	none	none	none	none	none	none	none	none	none	none	none	none
798	2015/3/30 9:33:28	209seconds	218.201.115.243(山东-潍坊)	Recommender System	femaile	<=30	notComputer	none	none	friends┋family member	none	friends┋family member	none	none	friends┋family member	none	none	friends┋family member	family member┋friends	friends┋family member	family member┋friends	friends┋family member	family member┋friends	friends┋family member	family member┋friends	friends┋family member	family member┋friends	none	friends┋family member	family member┋friends	family member	friends┋family member	family member┋friends	friends┋family member	none	none	none
799	2015/3/30 9:51:12	97seconds	202.198.133.79(吉林-长春)	Mobile Phone	femaile	<=30	notComputer	friends┋family member┋strangers	friends┋family member┋strangers	none	friends┋family member┋strangers	none	none	none	friends┋family member┋strangers	none	none	friends┋family member┋strangers	friends┋family member	family member	family member	family member	friends┋family member┋strangers	family member	friends┋family member┋strangers	none	none	friends┋family member┋strangers	none	friends┋family member┋strangers	friends┋family member┋strangers	none	friends┋family member┋strangers	friends┋family member	none	none	none
800	2015/3/30 10:16:52	73seconds	211.30.223.247(未知-未知)	Recommender System	male	<=30	notComputer	family member	family member	family member	family member	family member	family member	family member	family member	family member	family member	family member	family member	family member	family member	family member	family member	family member	family member	family member	family member	family member	family member	family member	family member	family member	family member	family member	family member	family member	family member
801	2015/3/30 11:00:19	125seconds	180.175.237.144(上海-上海)	Recommender System	male	<=30	notComputer	friends┋family member	friends	friends┋family member	friends	friends┋family member	family member	family member	friends┋family member	family member	family member	friends┋family member	family member┋friends	friends┋family member	family member┋friends	family member	friends┋family member	family member┋friends	friends┋family member	family member┋friends	family member	family member	friends┋family member	family member	family member	friends┋family member	family member	friends┋family member	family member	none	friends┋family member
802	2015/3/30 11:00:37	130seconds	222.18.38.208(四川-成都)	Recommender System	male	<=30	notComputer	friends┋family member	family member┋strangers┋friends	family member┋friends	friends┋family member	none	none	friends┋family member	family member┋strangers┋friends	none	none	friends┋family member┋strangers	friends┋family member┋strangers	friends┋family member	family member┋friends	family member	friends┋family member	family member┋strangers┋friends	family member┋strangers┋friends	family member┋strangers┋friends	none	friends┋family member	family member┋friends	friends┋family member	family member┋friends	family member	friends┋family member┋strangers	friends┋family member┋strangers	none	none	none
803	2015/3/30 11:18:54	85seconds	117.89.221.161(江苏-南京)	Recommender System	male	<=30	notComputer	friends┋family member┋strangers	none	family member	friends┋family member	family member	family member	friends	friends	friends	friends	strangers	strangers	friends	friends	friends	strangers	strangers	strangers	friends	strangers┋friends	friends	strangers	strangers	strangers	strangers	strangers	friends	strangers┋friends	friends	friends
804	2015/3/30 11:36:32	132seconds	117.40.38.171(江西-南昌)	Mobile Phone	femaile	<=30	notComputer	none	none	none	none	none	none	none	friends┋family member┋strangers	none	none	friends┋family member	none	none	none	friends┋family member	family member	friends┋family member	none	none	none	none	none	none	none	none	friends┋family member	friends	none	none	none
805	2015/3/30 11:36:49	95seconds	58.248.180.252(广东-广州)	Recommender System	femaile	<=30	notComputer	none	none	none	friends┋family member	family member┋friends	family member	family member	friends┋family member	none	family member	none	none	none	none	none	none	none	friends┋family member	family member┋friends	none	none	none	none	none	none	friends┋family member	family member┋friends	friends┋family member	none	none
806	2015/3/30 12:52:20	128seconds	36.40.62.51(陕西-西安)	Recommender System	male	<=30	Computer	friends	friends	none	friends	friends	friends	none	friends	none	family member	friends	friends┋family member	friends	friends	none	friends┋family member	family member┋strangers┋friends	family member┋strangers┋friends	family member┋strangers┋friends	family member	friends┋family member┋strangers	friends	friends	friends┋family member	family member┋strangers┋friends	family member┋strangers┋friends	family member┋strangers┋friends	family member┋friends	none	family member
807	2015/3/30 12:52:43	119seconds	27.21.13.176(湖北-宜昌)	Recommender System	femaile	<=30	notComputer	family member	friends┋family member	none	friends	friends┋family member	none	none	friends┋family member	friends	none	family member	friends┋family member	family member┋friends	none	none	friends┋family member	family member┋friends	friends┋family member	friends	none	friends┋family member	family member	friends┋family member	none	none	friends┋family member	family member┋friends	none	none	none
808	2015/3/30 13:00:09	122seconds	117.136.77.221(未知-未知)	Mobile Phone	femaile	<=30	notComputer	friends┋family member	friends	friends┋family member	family member┋friends	friends┋family member	friends	friends┋family member	family member┋friends	friends	friends┋family member	family member	friends	friends	friends┋family member	family member	friends	friends┋family member	family member┋friends	friends┋family member	family member	friends┋family member	family member┋friends	friends┋family member	family member┋friends	friends┋family member	friends	friends┋family member	friends	friends	family member
809	2015/3/30 13:01:00	141seconds	111.36.239.108(山东-临沂)	Mobile Phone	femaile	<=30	notComputer	none	none	none	friends	friends	none	none	friends	friends	friends	friends	friends	none	friends	family member	none	friends	friends	none	family member	none	none	family member	none	friends┋family member	none	none	friends	none	none
810	2015/3/30 13:02:37	77seconds	117.88.155.31(江苏-南京)	Recommender System	male	>30	notComputer	family member	none	none	friends┋family member	friends	none	none	friends┋family member	friends	none	none	family member	family member	none	none	none	none	none	family member	none	none	none	none	none	friends	friends	friends	none	none	none
811	2015/3/30 13:12:27	100seconds	222.173.220.236(山东-烟台)	Recommender System	male	<=30	notComputer	friends┋family member	family member┋friends	friends┋family member	none	none	none	none	friends┋family member┋strangers	none	none	friends┋family member┋strangers	friends┋family member┋strangers	none	none	none	none	none	friends┋family member┋strangers	friends┋family member┋strangers	none	none	none	none	none	none	none	none	none	none	none
812	2015/3/30 14:19:27	124seconds	123.124.147.83(北京-北京)	Recommender System	male	<=30	notComputer	friends┋family member	family member┋friends	none	none	none	none	none	friends┋family member	none	none	friends┋family member	family member┋friends	friends┋family member	family member┋friends	friends┋family member	family member┋friends	friends┋family member	family member┋friends	friends┋family member	family member	friends┋family member	family member┋friends	friends┋family member	family member	friends┋family member	family member┋friends	friends┋family member	none	none	family member
813	2015/3/30 16:26:10	146seconds	124.16.171.188(北京-北京)	Recommender System	femaile	<=30	notComputer	family member	family member	friends	none	friends	none	none	friends	none	friends	friends	friends	family member	friends	none	friends	friends	friends	friends	none	friends	friends	friends	none	friends	friends	friends	family member	none	none
814	2015/3/30 16:48:31	151seconds	221.192.178.15(河北-石家庄)	Mobile Phone	femaile	<=30	notComputer	none	none	none	friends	friends	friends	friends	friends	none	none	friends	friends	friends	friends	friends	none	friends	friends	friends	none	friends┋family member	family member┋friends	friends┋family member	family member┋friends	friends┋family member	family member┋friends	friends┋family member	none	friends┋family member	none
815	2015/3/30 17:58:48	156seconds	61.242.59.51(广东-广州)	Recommender System	male	<=30	notComputer	none	friends┋family member┋strangers	friends┋family member	family member┋friends	friends┋family member	none	none	friends┋family member┋strangers	friends┋family member┋strangers	none	friends┋family member┋strangers	friends┋family member┋strangers	friends┋family member	family member	none	friends┋family member┋strangers	friends┋family member	family member┋friends	friends┋family member┋strangers	none	friends┋family member┋strangers	friends┋family member┋strangers	friends┋family member┋strangers	friends┋family member	family member┋friends	friends┋family member┋strangers	friends┋family member┋strangers	none	family member	family member
816	2015/3/30 18:23:03	142seconds	117.136.54.40(北京-北京)	Mobile Phone	male	<=30	notComputer	friends┋family member	none	none	none	friends┋family member	none	none	friends┋family member	none	none	friends┋family member	family member┋friends	friends┋family member	family member┋friends	family member	none	friends┋family member	family member┋friends	family member	family member	none	none	none	family member	family member	none	none	none	none	none
817	2015/3/30 18:26:59	42seconds	222.171.12.126(黑龙江-哈尔滨)	Recommender System	male	<=30	notComputer	family member	family member	family member	family member	none	none	none	none	none	family member	family member	family member	family member	family member	family member	family member	family member	family member	family member	family member	family member	family member	family member	family member	family member	family member	none	none	none	none
819	2015/3/30 18:38:35	102seconds	183.62.37.118(广东-广州)	Mobile Phone	femaile	<=30	notComputer	none	none	none	friends┋family member┋strangers	friends┋family member┋strangers	none	none	friends┋family member┋strangers	friends┋family member┋strangers	friends┋family member┋strangers	none	family member	family member	family member	none	none	none	none	none	none	none	none	none	none	none	family member	family member	family member	none	none
820	2015/3/30 18:41:04	152seconds	182.18.105.113(北京-北京)	Mobile Phone	male	<=30	notComputer	none	family member	friends	none	none	none	none	friends	none	none	friends	friends	none	friends	none	none	family member	friends┋family member	none	none	none	none	none	none	none	none	none	none	none	none
823	2015/3/30 19:51:04	100seconds	183.62.57.222(广东-广州)	Recommender System	male	>30	notComputer	none	none	none	none	none	none	none	friends	none	none	friends┋family member┋strangers	friends┋family member	family member┋friends	none	none	none	none	none	none	none	none	none	none	none	none	none	none	none	none	none
824	2015/3/30 21:03:59	163seconds	175.16.102.44(吉林-吉林)	Recommender System	male	<=30	notComputer	friends┋family member	family member┋friends	friends┋family member	friends	friends┋family member	friends	none	friends┋family member	none	none	friends┋family member┋strangers	friends┋family member	family member	friends┋family member┋strangers	none	friends┋family member┋strangers	friends┋family member┋strangers	friends┋family member┋strangers	friends┋family member┋strangers	family member	none	friends┋family member	family member┋friends	family member	friends┋family member	family member┋friends	friends┋family member	none	none	none
825	2015/3/30 21:43:48	854seconds	210.46.79.22(黑龙江-哈尔滨)	Recommender System	male	<=30	notComputer	none	family member	none	friends	friends	none	none	friends┋family member	friends	friends	friends┋family member	family member┋friends	none	friends┋family member	family member	friends┋family member	family member┋friends	friends┋family member	family member┋friends	none	none	none	friends	none	none	friends	friends┋family member	none	none	none
826	2015/3/30 22:07:37	77seconds	221.238.245.62(天津-天津)	Recommender System	femaile	<=30	notComputer	none	none	none	none	none	none	none	none	none	friends	friends	friends	friends	friends	none	none	none	none	none	none	none	none	none	none	none	none	none	none	none	none
827	2015/3/30 22:50:24	136seconds	152.7.224.4(未知-未知)	Recommender System	femaile	>30	notComputer	none	none	none	family member	friends	friends┋family member	none	friends┋family member	family member┋friends	friends┋family member	family member┋friends	friends┋family member	family member	friends┋family member	family member┋friends	friends	friends┋family member	family member┋friends	friends┋family member	family member	friends┋family member	family member┋friends	friends┋family member	family member┋friends	friends┋family member	friends	friends	friends	none	family member
828	2015/3/30 22:52:39	60seconds	183.157.162.33(浙江-杭州)	Mobile Phone	femaile	<=30	notComputer	friends┋family member	friends	family member	family member	family member	family member	family member	family member	family member	family member	family member	family member	family member	family member	family member	family member	family member	family member	family member	family member	family member	family member	family member	family member	family member	family member	family member	family member	family member	family member
829	2015/3/30 23:05:38	231seconds	117.136.9.253(山东-济南)	Mobile Phone	femaile	<=30	notComputer	strangers┋friends	family member┋strangers	strangers┋family member	family member┋friends	strangers┋family member	friends┋strangers	strangers┋family member	family member┋friends	strangers┋friends	friends┋strangers	friends┋family member	family member┋strangers	strangers┋friends	family member┋friends	friends┋family member	friends┋strangers	friends┋family member	friends┋strangers	friends┋family member	family member┋strangers	strangers┋family member	family member┋strangers	friends┋family member┋strangers	strangers┋friends	family member┋friends	strangers┋family member	friends┋strangers	strangers┋friends	friends┋strangers	friends┋family member┋strangers
830	2015/3/30 23:08:30	120seconds	106.39.223.137(北京-北京)	Recommender System	male	>30	notComputer	family member	friends	family member	family member	friends	family member	friends┋family member	strangers	strangers	friends	friends	friends	friends	friends	friends	friends	friends	strangers	family member	family member	family member	family member	family member	family member	family member	family member	family member	family member	family member	family member
831	2015/3/30 23:30:22	64seconds	111.36.236.25(山东-临沂)	Mobile Phone	femaile	<=30	notComputer	none	none	none	none	none	none	none	none	none	none	none	none	none	none	none	none	none	none	none	none	none	none	none	none	none	none	none	none	none	none
832	2015/3/31 0:15:19	38seconds	111.38.43.231(安徽-马鞍山)	Recommender System	femaile	>30	notComputer	none	none	none	none	none	none	none	none	none	none	none	none	none	none	none	none	none	none	none	none	none	none	none	none	none	none	none	none	none	none
833	2015/3/31 0:23:37	259seconds	180.160.173.201(上海-上海)	WeChat	male	<=30	notComputer	friends┋family member	friends	friends	friends	friends	friends	friends	friends┋family member┋strangers	friends	friends	friends	friends	family member	family member	family member	friends	friends	friends	friends	none	strangers	friends	friends	friends	friends	friends	friends	friends	friends	none
834	2015/3/31 1:45:54	45seconds	210.41.216.13(四川-成都)	Recommender System	male	<=30	notComputer	none	none	none	none	none	none	none	none	none	none	none	none	none	none	none	none	none	none	none	none	none	none	none	none	none	none	none	none	none	none
835	2015/3/31 1:52:29	123seconds	65.92.184.133(未知-未知)	Recommender System	male	>30	notComputer	none	family member	friends┋family member	none	none	friends┋family member	family member┋friends	none	none	family member	none	none	none	none	none	none	none	none	none	none	none	none	none	none	none	family member	family member	none	none	family member
836	2015/3/31 5:38:47	178seconds	115.231.85.17(浙江-金华)	Mobile Phone	femaile	<=30	notComputer	none	none	none	friends┋family member	family member┋friends	friends┋family member	none	friends┋family member┋strangers	none	friends┋family member	family member┋strangers┋friends	family member┋friends	none	friends┋family member	family member┋friends	friends┋family member┋strangers	friends┋family member	family member┋friends	none	friends┋family member	family member┋friends	friends┋family member	family member┋friends	friends┋family member	friends	friends┋family member	family member┋friends	none	none	none
837	2015/3/31 7:04:30	144seconds	221.217.126.179(北京-北京)	Recommender System	femaile	>30	notComputer	none	none	none	friends	strangers	none	none	strangers	none	friends	strangers	friends	strangers	none	friends	strangers	family member	strangers	friends	none	family member	strangers	friends	friends	strangers	friends	family member	friends	strangers	none
838	2015/3/31 8:15:53	48seconds	210.51.42.135(上海-上海)	Recommender System	male	<=30	notComputer	none	none	none	none	none	none	none	none	none	none	none	none	none	none	strangers	none	strangers	strangers	strangers	strangers	strangers	strangers	strangers	strangers	strangers	strangers	strangers	strangers	strangers	strangers
839	2015/3/31 9:06:14	116seconds	1.194.187.2(河南-开封)	Poster Link	male	>30	notComputer	friends┋family member	friends┋strangers	family member	friends┋family member	friends	family member	none	friends┋family member	none	none	friends┋family member	family member┋friends	friends┋family member	family member	none	family member	family member	friends┋family member	none	none	friends┋family member	family member┋strangers┋friends	family member┋friends	none	none	none	friends┋family member┋strangers	none	none	none
840	2015/3/31 9:25:32	80seconds	60.173.83.140(安徽-宣城)	Recommender System	male	<=30	notComputer	none	none	none	none	none	none	none	none	none	none	none	none	none	none	none	none	none	none	none	none	none	none	none	none	none	friends┋family member	family member┋friends	none	none	none
841	2015/3/31 9:31:36	175seconds	111.20.240.177(陕西-汉中)	Mobile Phone	male	<=30	notComputer	friends┋family member	friends	friends	family member	friends┋family member	none	none	friends┋family member	none	none	none	friends┋family member	family member┋friends	friends┋family member	family member	family member	friends┋family member	family member┋friends	family member	family member	none	none	none	family member	family member	friends	friends	none	none	none
842	2015/3/31 9:32:40	136seconds	210.41.243.25(四川-成都)	Recommender System	male	<=30	notComputer	none	family member	family member	friends┋family member	family member┋friends	friends┋family member	family member┋friends	friends┋family member	family member┋friends	friends┋family member	family member┋friends	friends┋family member	family member┋friends	friends┋family member	family member┋friends	friends┋family member	family member┋friends	friends┋family member	family member┋friends	none	friends┋family member	family member┋friends	friends┋family member	family member┋friends	friends┋family member	family member┋strangers┋friends	family member┋friends	friends┋family member	family member┋friends	friends┋family member
843	2015/3/31 9:33:54	134seconds	171.113.110.222(湖北-武汉)	Mobile Phone	male	<=30	notComputer	family member	none	none	friends	friends	none	family member	friends	friends	friends	strangers	strangers	friends	friends	family member	none	friends	friends	strangers	none	friends	friends	none	family member	family member	none	friends	none	none	none
844	2015/3/31 9:36:08	114seconds	117.136.45.140(江苏-南京)	Mobile Phone	femaile	<=30	notComputer	friends┋family member	family member┋friends	family member	family member	friends┋family member	none	none	friends┋family member	friends	friends	friends┋family member	family member┋friends	friends┋family member	family member┋friends	family member	friends┋family member┋strangers	friends┋family member	family member┋friends	friends┋family member	family member	friends┋family member	family member┋friends	family member	family member	friends┋family member	family member┋friends	friends┋family member	family member┋friends	none	family member
845	2015/3/31 9:51:57	69seconds	124.207.160.114(北京-北京)	Recommender System	femaile	>30	notComputer	none	none	none	none	none	none	none	none	none	none	none	none	none	none	none	none	none	none	none	none	none	none	none	none	none	none	none	none	none	none
846	2015/3/31 10:08:33	48seconds	124.205.212.27(北京-北京)	Mobile Phone	male	<=30	notComputer	family member	strangers┋friends	friends	friends	friends	friends	friends	friends	friends	friends	friends	friends	friends	friends	friends	friends	friends	friends	friends	friends	friends	friends	friends	friends	friends	friends	friends	friends	friends	friends
847	2015/3/31 10:33:33	51seconds	58.213.51.41(江苏-南京)	Recommender System	male	<=30	notComputer	friends┋family member	family member┋friends	friends┋family member	family member┋friends	friends┋family member	family member┋friends	friends┋family member	family member┋friends	friends┋family member	family member┋friends	friends┋family member	family member┋friends	friends┋family member	family member┋friends	friends┋family member	family member┋friends	friends┋family member	family member┋friends	friends┋family member	family member┋friends	friends┋family member	family member┋friends	friends┋family member	family member┋friends	friends┋family member	family member┋friends	friends┋family member	family member┋friends	friends┋family member	family member┋friends
849	2015/3/31 10:46:33	120seconds	60.213.4.218(山东-临沂)	Recommender System	male	>30	notComputer	family member	family member	family member	family member	none	none	family member	family member	none	family member	friends┋family member┋strangers	family member	family member	family member	family member	friends┋family member┋strangers	family member	friends┋family member	friends	family member	none	none	family member	none	none	none	none	none	none	none
850	2015/3/31 11:00:39	90seconds	117.28.251.177(福建-厦门)	Recommender System	male	<=30	notComputer	none	none	none	none	none	none	none	friends┋family member	none	family member	family member	family member	family member	family member	family member	friends┋family member	family member┋friends	friends┋family member	family member┋friends	none	none	none	none	none	none	none	none	none	none	none
851	2015/3/31 11:11:14	40seconds	222.185.140.141(江苏-常州)	Recommender System	male	<=30	notComputer	friends	friends	friends	friends	friends	friends	friends	friends	friends	friends	friends	friends	friends	friends	friends	friends	friends	friends	friends	family member	friends	friends	friends	friends	friends	friends	friends	friends	friends	friends
852	2015/3/31 16:14:27	96seconds	218.104.96.133(湖北-武汉)	Recommender System	male	<=30	notComputer	family member	none	none	none	none	none	none	family member	none	none	family member	friends┋family member	family member┋friends	friends┋family member	family member┋friends	family member	family member	friends┋family member┋strangers	family member	family member	friends┋family member┋strangers	friends┋family member┋strangers	none	none	none	friends┋family member	family member┋friends	family member	none	family member
853	2015/3/31 17:57:08	119seconds	106.46.120.110(河南-焦作)	Mobile Phone	male	<=30	Computer	none	none	none	none	none	none	friends┋family member	family member	family member	none	none	friends┋family member	family member	friends	none	none	family member	family member	family member	none	friends	none	none	none	none	none	none	none	none	none
854	2015/3/31 21:11:01	81seconds	42.229.57.96(河南-新乡)	Mobile Phone	male	<=30	notComputer	friends┋family member	family member┋friends	family member	friends┋family member	family member┋friends	none	none	friends┋family member	none	none	friends┋family member	family member┋friends	friends┋family member	family member┋friends	family member	friends┋family member	family member┋friends	friends┋family member	family member┋friends	none	friends┋family member	family member	family member	family member	friends┋family member	family member┋friends	friends┋family member┋strangers	family member	none	none
855	2015/4/1 0:16:59	96seconds	117.166.148.179(江西-未知)	Recommender System	femaile	>30	notComputer	family member	family member	family member	family member	family member	family member	friends	friends	friends	family member	family member	friends	friends	family member	friends	family member	friends	friends	family member	family member	family member	family member	family member	family member	family member	friends	friends	family member	family member	family member
856	2015/4/1 1:53:41	68seconds	130.232.144.157(未知-未知)	Recommender System	male	<=30	notComputer	friends┋family member	friends	friends┋family member	friends	friends┋family member	family member┋friends	friends	friends┋family member	friends	friends┋family member	friends	friends┋family member	friends	friends┋family member	friends	friends┋family member	friends	friends┋family member	friends	friends┋family member	friends	friends┋family member	friends	friends	friends	friends┋family member	friends	friends	friends┋family member	friends
857	2015/4/1 8:57:05	96seconds	106.39.120.110(北京-北京)	Recommender System	male	<=30	notComputer	none	none	none	none	none	none	none	friends	friends	none	none	none	none	none	none	friends	friends	friends	friends	none	friends	friends	friends	none	friends	friends	friends	none	none	none
858	2015/4/1 15:31:42	174seconds	150.255.36.150(海南-海口)	Mobile Phone	femaile	<=30	notComputer	friends┋family member┋strangers	friends┋family member	family member┋friends	none	none	none	none	friends┋family member	none	none	friends┋family member┋strangers	friends┋family member	family member┋friends	family member	friends┋family member	family member┋friends	family member	friends┋family member┋strangers	friends┋family member	family member	family member	family member	family member	family member	family member	none	none	friends┋family member	none	family member
859	2015/4/2 8:28:15	63seconds	112.97.36.104(广东-深圳)	Mobile Phone	male	<=30	notComputer	family member	family member	friends	family member	family member	family member	family member	friends	friends	family member	family member	friends	friends	family member	friends	friends	family member	friends	friends	friends	friends	friends	friends	friends	friends	friends	friends	friends	friends	friends
860	2015/4/2 8:30:08	60seconds	117.136.73.9(云南-昆明)	Mobile Phone	male	<=30	notComputer	none	friends	friends	strangers	friends	strangers	friends	strangers	friends	strangers	strangers	friends	strangers	friends	friends	strangers	friends	friends	friends	strangers	strangers	friends	strangers	strangers	strangers	strangers	none	friends	none	friends
